# Supplementary material for: Genome-wide identification and expression profiling of Alba gene family members in response to abiotic stress in tomato (Solanum lycopersicum L.)
Source: Research Square preprint supplement (doi:10.21203/rs.3.rs-701131/v1), 2021-07-12
Supplement: Supplementary file 1 [file db0ef205e7cfcba3ce3a553a.xlsx]

## Sheet: MiRNA targets
Table S6. Prediction of miRNA target sequences in tomato Alba genes
miRNA_Acc.	Target_Acc.	Expectation	UPE$	miRNA_start	miRNA_end	Target_start	Target_end	miRNA_aligned_fragment	alignment	Target_aligned_fragment	Inhibition	Target_Desc.	Multiplicity
aly-miR859-5p	SlAlba1	5	-1	1	21	354	374	UCUCUCCGUUGUAAAAUCAAA	::. :::.:.:::::::	GGUGGAUUUGCGACGGAGAAG	Cleavage	Nucleic acid binding protein (AHRD V1 *-*- D7L2W2_ARALY); contains Interpro domain(s) IPR014560 Uncharacterised conserved protein UCP030333, DNA/RNA-binding Alba-related	1
ata-miR171a-5p	SlAlba1	4.5	-1	1	20	482	501	UGGUAUUGUUUCGGCUCAUG	:::: : ::.::::::.:	GAUGACACCAAGCAAUACUA	Cleavage	Nucleic acid binding protein (AHRD V1 *-*- D7L2W2_ARALY); contains Interpro domain(s) IPR014560 Uncharacterised conserved protein UCP030333, DNA/RNA-binding Alba-related	1
ata-miR9863a-5p	SlAlba1	5	-1	1	21	366	386	UGUUAUGAUCUGCUUCUCAUC	:::::: ::.:. :::::	ACGGAGAAGAAGGUUUUAACA	Cleavage	Nucleic acid binding protein (AHRD V1 *-*- D7L2W2_ARALY); contains Interpro domain(s) IPR014560 Uncharacterised conserved protein UCP030333, DNA/RNA-binding Alba-related	1
ata-miR9863b-5p	SlAlba1	5	-1	1	21	366	386	UGUUAUGAUCUGCUUCUCAUC	:::::: ::.:. :::::	ACGGAGAAGAAGGUUUUAACA	Cleavage	Nucleic acid binding protein (AHRD V1 *-*- D7L2W2_ARALY); contains Interpro domain(s) IPR014560 Uncharacterised conserved protein UCP030333, DNA/RNA-binding Alba-related	1
ath-miR5640	SlAlba1	5	-1	1	21	48	68	UGAGAGAAGGAAUUAGAUUCA	: :::. :: :..::.:.:::	UUAAUUGAAAUUUUUUUUUCA	Cleavage	Nucleic acid binding protein (AHRD V1 *-*- D7L2W2_ARALY); contains Interpro domain(s) IPR014560 Uncharacterised conserved protein UCP030333, DNA/RNA-binding Alba-related	1
ath-miR8182	SlAlba1	5	-1	1	22	189	210	UUGUGUUGCGUUUCUGUUGAUU	:::. ::::: :.:::: ::	GCUCAGAAGAAAAGUAACAGAA	Translation	Nucleic acid binding protein (AHRD V1 *-*- D7L2W2_ARALY); contains Interpro domain(s) IPR014560 Uncharacterised conserved protein UCP030333, DNA/RNA-binding Alba-related	1
bdi-miR5057	SlAlba1	5	-1	1	21	40	60	AAAUUUCAAAUCAUUUUGACA	:::: : : :::::::::	CCCCAAAUUUAAUUGAAAUUU	Translation	Nucleic acid binding protein (AHRD V1 *-*- D7L2W2_ARALY); contains Interpro domain(s) IPR014560 Uncharacterised conserved protein UCP030333, DNA/RNA-binding Alba-related	1
bdi-miR5185a-3p	SlAlba1	4.5	-1	1	21	11	31	UUUGAGAAUUGAACUAGAAGC	.::.:: ::.:: :.:.:::	UUUUUUAAUUUAAAUUUUAAA	Cleavage	Nucleic acid binding protein (AHRD V1 *-*- D7L2W2_ARALY); contains Interpro domain(s) IPR014560 Uncharacterised conserved protein UCP030333, DNA/RNA-binding Alba-related	1
bdi-miR5185b-3p	SlAlba1	4.5	-1	1	21	11	31	UUUGAGAAUUGAACUAGAAGC	.::.:: ::.:: :.:.:::	UUUUUUAAUUUAAAUUUUAAA	Cleavage	Nucleic acid binding protein (AHRD V1 *-*- D7L2W2_ARALY); contains Interpro domain(s) IPR014560 Uncharacterised conserved protein UCP030333, DNA/RNA-binding Alba-related	1
bdi-miR7711-5p.1	SlAlba1	4.5	-1	1	24	721	744	UACUUAGCCUCUUUGACAAUCUUG	::.:.::::::::: ::	GUUAAAAGUUAGAGAGGCUAAAUA	Cleavage	Nucleic acid binding protein (AHRD V1 *-*- D7L2W2_ARALY); contains Interpro domain(s) IPR014560 Uncharacterised conserved protein UCP030333, DNA/RNA-binding Alba-related	1
bra-miR5721	SlAlba1	5	-1	1	21	676	696	AAAAAUGGAGUGAGAAAUGGA	..::::::.:.: .:::: :	AUUAUUUCUUAUUAUAUUUGU	Cleavage	Nucleic acid binding protein (AHRD V1 *-*- D7L2W2_ARALY); contains Interpro domain(s) IPR014560 Uncharacterised conserved protein UCP030333, DNA/RNA-binding Alba-related	1
bra-miR9556-5p	SlAlba1	5	-1	1	21	544	563	GUCAAUUGGUGAUAGUAGUUC	.: ::::::.::.::: :::	AGAAUACUAUUACUAAU-GAC	Cleavage	Nucleic acid binding protein (AHRD V1 *-*- D7L2W2_ARALY); contains Interpro domain(s) IPR014560 Uncharacterised conserved protein UCP030333, DNA/RNA-binding Alba-related	1
cre-miR1160.2	SlAlba1	5	-1	1	21	232	252	UGACAAGGAAGCAGAGCGGAU	: :: ::.: ::::. :::::	AACCACUUUUCUUCUAUGUCA	Cleavage	Nucleic acid binding protein (AHRD V1 *-*- D7L2W2_ARALY); contains Interpro domain(s) IPR014560 Uncharacterised conserved protein UCP030333, DNA/RNA-binding Alba-related	1
csi-miR3949	SlAlba1	5	-1	1	22	809	830	UGAUGUUGAGGCAAAAAUGUAG	.: . :::::::::: :.:: :	UUUUUUUUUUGCCUCCAUAUAA	Cleavage	Nucleic acid binding protein (AHRD V1 *-*- D7L2W2_ARALY); contains Interpro domain(s) IPR014560 Uncharacterised conserved protein UCP030333, DNA/RNA-binding Alba-related	1
csi-miR3950	SlAlba1	4.5	-1	1	21	443	463	UUUUUCGGCAACAUGAUUUCU	::.:: .::::: ::::.:.	UGAGAUAGUGUUGACGAAGAG	Cleavage	Nucleic acid binding protein (AHRD V1 *-*- D7L2W2_ARALY); contains Interpro domain(s) IPR014560 Uncharacterised conserved protein UCP030333, DNA/RNA-binding Alba-related	1
gma-miR1533	SlAlba1	3.5	-1	1	19	681	699	AUAAUAAAAAUAAUAAUGA	:. ::::::: :::.::::	UUCUUAUUAUAUUUGUUAU	Cleavage	Nucleic acid binding protein (AHRD V1 *-*- D7L2W2_ARALY); contains Interpro domain(s) IPR014560 Uncharacterised conserved protein UCP030333, DNA/RNA-binding Alba-related	1
gma-miR4351	SlAlba1	4.5	-1	1	22	617	638	AUUGGGAUUCAGUUGGAGUUGG	:. :.::. :::: :::.::.:	CUCAUUCUUACUGUAUCUCAGU	Cleavage	Nucleic acid binding protein (AHRD V1 *-*- D7L2W2_ARALY); contains Interpro domain(s) IPR014560 Uncharacterised conserved protein UCP030333, DNA/RNA-binding Alba-related	1
gma-miR5672	SlAlba1	4	-1	1	21	701	721	CAUGGUAGUGGAAGAAAUGGA	..::: :: :.:::::.:::	AUUAUUACUACUACUACUAUG	Cleavage	Nucleic acid binding protein (AHRD V1 *-*- D7L2W2_ARALY); contains Interpro domain(s) IPR014560 Uncharacterised conserved protein UCP030333, DNA/RNA-binding Alba-related	1
gma-miR5779	SlAlba1	5	-1	1	24	288	311	CAAGUCCAAAGUAGGAAUGUUGCA	..: ::.::.::::::.: ::	GUUGAGCUUUCUGCUUUGGGCAUG	Cleavage	Nucleic acid binding protein (AHRD V1 *-*- D7L2W2_ARALY); contains Interpro domain(s) IPR014560 Uncharacterised conserved protein UCP030333, DNA/RNA-binding Alba-related	1
gma-miR9724	SlAlba1	5	-1	1	22	664	685	UAGAGAUAGUGUCAAAAUAGAA	: .:::: :: .:.:::.:::	UAUUAUUCUGCUAUUAUUUCUU	Cleavage	Nucleic acid binding protein (AHRD V1 *-*- D7L2W2_ARALY); contains Interpro domain(s) IPR014560 Uncharacterised conserved protein UCP030333, DNA/RNA-binding Alba-related	1
gma-miR9729	SlAlba1	5	-1	1	24	583	606	GUAAUGAGUAGAAACAUUUAGAAG	::: : : :::::..:::.	AGUAGAAAGGAUGCUACUUGUUAU	Cleavage	Nucleic acid binding protein (AHRD V1 *-*- D7L2W2_ARALY); contains Interpro domain(s) IPR014560 Uncharacterised conserved protein UCP030333, DNA/RNA-binding Alba-related	1
gma-miR9749	SlAlba1	4.5	-1	1	21	721	741	UUAGCUUCUUUCACCUUUCCC	::: :: :.:::.:::::	GUUAAAAGUUAGAGAGGCUAA	Cleavage	Nucleic acid binding protein (AHRD V1 *-*- D7L2W2_ARALY); contains Interpro domain(s) IPR014560 Uncharacterised conserved protein UCP030333, DNA/RNA-binding Alba-related	1
gra-miR530a	SlAlba1	4.5	-1	1	21	150	170	AGGUGCAGAUGCAGUUGCAGG	.:: :: : :::::::::::	UCUACACCAGCAUCUGCACCA	Cleavage	Nucleic acid binding protein (AHRD V1 *-*- D7L2W2_ARALY); contains Interpro domain(s) IPR014560 Uncharacterised conserved protein UCP030333, DNA/RNA-binding Alba-related	2
gra-miR530a	SlAlba1	5	-1	1	21	105	125	AGGUGCAGAUGCAGUUGCAGG	::: :::.: :::::::	AUGGCACCUGUAGCUGCACCC	Cleavage	Nucleic acid binding protein (AHRD V1 *-*- D7L2W2_ARALY); contains Interpro domain(s) IPR014560 Uncharacterised conserved protein UCP030333, DNA/RNA-binding Alba-related	2
gra-miR530b	SlAlba1	5	-1	1	21	105	125	AGGUGCAGGUGCAGGCGCAGC	:: ::::.: :::::::	AUGGCACCUGUAGCUGCACCC	Cleavage	Nucleic acid binding protein (AHRD V1 *-*- D7L2W2_ARALY); contains Interpro domain(s) IPR014560 Uncharacterised conserved protein UCP030333, DNA/RNA-binding Alba-related	1
gra-miR7492d	SlAlba1	5	-1	1	24	21	44	UGGGCUUAGAUUUUUUGCGGCGUU	.:::::.:.::: ::::	UAAAUUUUAAAAAGUUUAACCCCA	Cleavage	Nucleic acid binding protein (AHRD V1 *-*- D7L2W2_ARALY); contains Interpro domain(s) IPR014560 Uncharacterised conserved protein UCP030333, DNA/RNA-binding Alba-related	1
gra-miR7494c	SlAlba1	5	-1	1	24	803	826	AUGGAGGAAAACAGAGGGAGAAGC	:...:.: ::: :::::::	AGGAAUUUUUUUUUUUGCCUCCAU	Cleavage	Nucleic acid binding protein (AHRD V1 *-*- D7L2W2_ARALY); contains Interpro domain(s) IPR014560 Uncharacterised conserved protein UCP030333, DNA/RNA-binding Alba-related	1
gra-miR7504d	SlAlba1	5	-1	1	24	45	68	AGGAAAAAAAAUCUGAUUUGUCAU	.:: : : :::::::::.:	AAUUUAAUUGAAAUUUUUUUUUCA	Cleavage	Nucleic acid binding protein (AHRD V1 *-*- D7L2W2_ARALY); contains Interpro domain(s) IPR014560 Uncharacterised conserved protein UCP030333, DNA/RNA-binding Alba-related	1
gra-miR8691	SlAlba1	5	-1	1	24	669	692	AGAUGAUGAGAAAGGAAAGUCAAG	.:: :. :::::.::.:: :	UUCUGCUAUUAUUUCUUAUUAUAU	Cleavage	Nucleic acid binding protein (AHRD V1 *-*- D7L2W2_ARALY); contains Interpro domain(s) IPR014560 Uncharacterised conserved protein UCP030333, DNA/RNA-binding Alba-related	1
gra-miR8756	SlAlba1	5	-1	1	24	15	38	UGGACUGUUAAAAUUUUAAUGGCA	::::: ::: :: :::..:	UUAAUUUAAAUUUUAAAAAGUUUA	Translation	Nucleic acid binding protein (AHRD V1 *-*- D7L2W2_ARALY); contains Interpro domain(s) IPR014560 Uncharacterised conserved protein UCP030333, DNA/RNA-binding Alba-related	1
gra-miR8770	SlAlba1	5	-1	1	24	685	708	UUGAUGGUGGUAAGAAAUGUGCAU	.:.:::: :::..:..::.:	UAUUAUAUUUGUUAUUAUUAUUAC	Cleavage	Nucleic acid binding protein (AHRD V1 *-*- D7L2W2_ARALY); contains Interpro domain(s) IPR014560 Uncharacterised conserved protein UCP030333, DNA/RNA-binding Alba-related	1
hme-miR-6305-3p	SlAlba1	5	-1	1	22	667	688	UGUGAGAAAUUCUAGCAGAUGA	::::::: ::::::.:.	UAUUCUGCUAUUAUUUCUUAUU	Translation	Nucleic acid binding protein (AHRD V1 *-*- D7L2W2_ARALY); contains Interpro domain(s) IPR014560 Uncharacterised conserved protein UCP030333, DNA/RNA-binding Alba-related	2
hme-miR-6305-3p	SlAlba1	5	-1	1	22	827	848	UGUGAGAAAUUCUAGCAGAUGA	.: :: ::::.::: :::::	AUAACUUAUAGAGUUUGUCACA	Cleavage	Nucleic acid binding protein (AHRD V1 *-*- D7L2W2_ARALY); contains Interpro domain(s) IPR014560 Uncharacterised conserved protein UCP030333, DNA/RNA-binding Alba-related	2
mtr-miR2590h	SlAlba1	4.5	-1	1	24	233	256	AGAAUGACAUGGCAGAAUAAUCAC	: : :::: :.:::::: :::	ACCACUUUUCUUCUAUGUCAAUCU	Cleavage	Nucleic acid binding protein (AHRD V1 *-*- D7L2W2_ARALY); contains Interpro domain(s) IPR014560 Uncharacterised conserved protein UCP030333, DNA/RNA-binding Alba-related	1
mtr-miR2590i	SlAlba1	4.5	-1	1	24	233	256	AGAAUGACAUGGCAGAAUAAUCAC	: : :::: :.:::::: :::	ACCACUUUUCUUCUAUGUCAAUCU	Cleavage	Nucleic acid binding protein (AHRD V1 *-*- D7L2W2_ARALY); contains Interpro domain(s) IPR014560 Uncharacterised conserved protein UCP030333, DNA/RNA-binding Alba-related	1
mtr-miR2592ap	SlAlba1	4.5	-1	1	21	142	162	AGGCUGGUUUAGAUGAAGGUA	:::: .::::: :::::: :	CACCUGUAUCUACACCAGCAU	Cleavage	Nucleic acid binding protein (AHRD V1 *-*- D7L2W2_ARALY); contains Interpro domain(s) IPR014560 Uncharacterised conserved protein UCP030333, DNA/RNA-binding Alba-related	1
mtr-miR2592aq	SlAlba1	4.5	-1	1	21	142	162	AGGCUGGUUUAGAUGAAGGUA	:::: .::::: :::::: :	CACCUGUAUCUACACCAGCAU	Cleavage	Nucleic acid binding protein (AHRD V1 *-*- D7L2W2_ARALY); contains Interpro domain(s) IPR014560 Uncharacterised conserved protein UCP030333, DNA/RNA-binding Alba-related	1
mtr-miR2661	SlAlba1	4.5	-1	1	21	854	874	UAGGUUUGAGAAAAUGGGCAG	: :..: :::.::::::.:.	CAGUUCCCUUUUUCAAACUUG	Cleavage	Nucleic acid binding protein (AHRD V1 *-*- D7L2W2_ARALY); contains Interpro domain(s) IPR014560 Uncharacterised conserved protein UCP030333, DNA/RNA-binding Alba-related	1
mtr-miR2671a	SlAlba1	5	-1	1	21	364	384	UUAAAAGUUUCGUUUCGGUCC	::: ::.: :::. ::::::	CGACGGAGAAGAAGGUUUUAA	Cleavage	Nucleic acid binding protein (AHRD V1 *-*- D7L2W2_ARALY); contains Interpro domain(s) IPR014560 Uncharacterised conserved protein UCP030333, DNA/RNA-binding Alba-related	1
mtr-miR2671b	SlAlba1	5	-1	1	21	364	384	UUAAAAGUUUCGUUUCGGUCC	::: ::.: :::. ::::::	CGACGGAGAAGAAGGUUUUAA	Cleavage	Nucleic acid binding protein (AHRD V1 *-*- D7L2W2_ARALY); contains Interpro domain(s) IPR014560 Uncharacterised conserved protein UCP030333, DNA/RNA-binding Alba-related	1
mtr-miR5257	SlAlba1	5	-1	1	21	583	603	ACAAGUAGAACCUUUUUUCUG	:.:::.: : ::::::::	AGUAGAAAGGAUGCUACUUGU	Translation	Nucleic acid binding protein (AHRD V1 *-*- D7L2W2_ARALY); contains Interpro domain(s) IPR014560 Uncharacterised conserved protein UCP030333, DNA/RNA-binding Alba-related	1
mtr-miR5558-3p	SlAlba1	4.5	-1	1	21	9	29	UAGAUUUAGAAUUAGAAAAGC	.::::.:::::. :: :.::	CUUUUUUUAAUUUAAAUUUUA	Cleavage	Nucleic acid binding protein (AHRD V1 *-*- D7L2W2_ARALY); contains Interpro domain(s) IPR014560 Uncharacterised conserved protein UCP030333, DNA/RNA-binding Alba-related	1
mtr-miR7696c-3p	SlAlba1	5	-1	1	21	413	433	UUUUGAAUUAUGAGAACUUGA	::: : :::..::::.::	CAAAGGCCGCAUGGUUCAGAA	Cleavage	Nucleic acid binding protein (AHRD V1 *-*- D7L2W2_ARALY); contains Interpro domain(s) IPR014560 Uncharacterised conserved protein UCP030333, DNA/RNA-binding Alba-related	1
mtr-miR7696d-3p	SlAlba1	5	-1	1	21	413	433	UUUUGAAUUAUGAGAACUUGA	::: : :::..::::.::	CAAAGGCCGCAUGGUUCAGAA	Cleavage	Nucleic acid binding protein (AHRD V1 *-*- D7L2W2_ARALY); contains Interpro domain(s) IPR014560 Uncharacterised conserved protein UCP030333, DNA/RNA-binding Alba-related	1
osa-miR2873a	SlAlba1	5	-1	1	24	26	49	AAGUUUGGACUUAAAUUUGGUAAC	::: ::.::::: :::::.::	UUUAAAAAGUUUAACCCCAAAUUU	Translation	Nucleic acid binding protein (AHRD V1 *-*- D7L2W2_ARALY); contains Interpro domain(s) IPR014560 Uncharacterised conserved protein UCP030333, DNA/RNA-binding Alba-related	1
osa-miR5157a-3p	SlAlba1	5	-1	1	24	779	802	AGAAGUUGUGGCUAUCAAAAAGUU	..: :::: ::.....::::.:	UGUUGUUUGUGAGUUGUGACUUUU	Cleavage	Nucleic acid binding protein (AHRD V1 *-*- D7L2W2_ARALY); contains Interpro domain(s) IPR014560 Uncharacterised conserved protein UCP030333, DNA/RNA-binding Alba-related	1
osa-miR5157b-3p	SlAlba1	5	-1	1	24	779	802	AGAAGUUGUGGCUAUCAAAAAGUU	..: :::: ::.....::::.:	UGUUGUUUGUGAGUUGUGACUUUU	Cleavage	Nucleic acid binding protein (AHRD V1 *-*- D7L2W2_ARALY); contains Interpro domain(s) IPR014560 Uncharacterised conserved protein UCP030333, DNA/RNA-binding Alba-related	1
osa-miR5788	SlAlba1	4.5	-1	1	21	832	852	UGGAUGUGACAUACUCUAGUA	:::::: ::::::::..	UUAUAGAGUUUGUCACAUUUU	Cleavage	Nucleic acid binding protein (AHRD V1 *-*- D7L2W2_ARALY); contains Interpro domain(s) IPR014560 Uncharacterised conserved protein UCP030333, DNA/RNA-binding Alba-related	1
osa-miR5824	SlAlba1	5	-1	1	24	671	693	AGUCUGAUAAGAAGUCAAUGGCGU	.::.::: :.:::::::.: :.:	CUGCUAUU-AUUUCUUAUUAUAUU	Cleavage	Nucleic acid binding protein (AHRD V1 *-*- D7L2W2_ARALY); contains Interpro domain(s) IPR014560 Uncharacterised conserved protein UCP030333, DNA/RNA-binding Alba-related	1
osa-miR7693-5p	SlAlba1	5	-1	1	24	447	470	GUUUCCGCUCUUCAUCGAUGGCUG	..:.:: :::::::: .::	AUAGUGUUGACGAAGAGCGAGAAG	Cleavage	Nucleic acid binding protein (AHRD V1 *-*- D7L2W2_ARALY); contains Interpro domain(s) IPR014560 Uncharacterised conserved protein UCP030333, DNA/RNA-binding Alba-related	1
ppt-miR902k-5p	SlAlba1	5	-1	1	21	350	370	UAUGUUGCAGAUUCUUCAUUU	.::::. :.::.:::.::. :	GAAUGGUGGAUUUGCGACGGA	Cleavage	Nucleic acid binding protein (AHRD V1 *-*- D7L2W2_ARALY); contains Interpro domain(s) IPR014560 Uncharacterised conserved protein UCP030333, DNA/RNA-binding Alba-related	1
ptc-miR6460	SlAlba1	5	-1	1	21	643	663	UGAUAUGUGGCAUUCAAUCGA	:.::::.::::::::	AUAUGAGGAUGCUACAUAUCA	Cleavage	Nucleic acid binding protein (AHRD V1 *-*- D7L2W2_ARALY); contains Interpro domain(s) IPR014560 Uncharacterised conserved protein UCP030333, DNA/RNA-binding Alba-related	1
rgl-miR7797b	SlAlba1	4	-1	1	23	394	416	UUUGAUUUCGUCUUACAUUUUUC	..:::: ::::.::.. ::::	UUGGAAUGAAAGAUGAGGCCAAA	Cleavage	Nucleic acid binding protein (AHRD V1 *-*- D7L2W2_ARALY); contains Interpro domain(s) IPR014560 Uncharacterised conserved protein UCP030333, DNA/RNA-binding Alba-related	1
rgl-miR7972	SlAlba1	5	-1	1	21	458	478	UUGUCAGGCUUGUUAUUCUCC	: :::. .: :::..:::.::	GAAGAGCGAGAAGUUUGAUAA	Cleavage	Nucleic acid binding protein (AHRD V1 *-*- D7L2W2_ARALY); contains Interpro domain(s) IPR014560 Uncharacterised conserved protein UCP030333, DNA/RNA-binding Alba-related	1
sly-miR9477-3p	SlAlba1	4.5	-1	1	24	846	869	UUGGGAAAGGGAACAACUGAUAGU	:: :. : :::::::::..:::	ACAUUUUGCAGUUCCCUUUUUCAA	Cleavage	Nucleic acid binding protein (AHRD V1 *-*- D7L2W2_ARALY); contains Interpro domain(s) IPR014560 Uncharacterised conserved protein UCP030333, DNA/RNA-binding Alba-related	1
smo-miR1081	SlAlba1	4.5	-1	1	21	750	770	UGAGGCUUGCCUUUGAUUCUC	: ::::::::: :::::	UGACAGCAAAGGCAACCCUCA	Cleavage	Nucleic acid binding protein (AHRD V1 *-*- D7L2W2_ARALY); contains Interpro domain(s) IPR014560 Uncharacterised conserved protein UCP030333, DNA/RNA-binding Alba-related	1
ssl-miR948	SlAlba1	5	-1	1	20	117	137	UGUGGCU-GUGUGGGUUCCGG	: : :::::::: :::::::	GCUGCACCCACACUAGCCACA	Cleavage	Nucleic acid binding protein (AHRD V1 *-*- D7L2W2_ARALY); contains Interpro domain(s) IPR014560 Uncharacterised conserved protein UCP030333, DNA/RNA-binding Alba-related	1
tae-miR9668-5p	SlAlba1	5	-1	1	21	589	609	CCAAUGACAAGUAUUUUCGGA	:: . :::::::.::::	AAGGAUGCUACUUGUUAUUGU	Cleavage	Nucleic acid binding protein (AHRD V1 *-*- D7L2W2_ARALY); contains Interpro domain(s) IPR014560 Uncharacterised conserved protein UCP030333, DNA/RNA-binding Alba-related	1
vvi-miR3624-5p	SlAlba1	4.5	-1	1	21	265	285	UAGUAUGCUGCUGUCUUUAGA	:: : .:::::::::: :.	GGUACAUGCAGCAGCAUAAUG	Cleavage	Nucleic acid binding protein (AHRD V1 *-*- D7L2W2_ARALY); contains Interpro domain(s) IPR014560 Uncharacterised conserved protein UCP030333, DNA/RNA-binding Alba-related	1
zma-miR171h-5p	SlAlba1	4.5	-1	1	21	481	501	UGGUAUUGUUUCGGCUCAUGU	:::: : ::.::::::.:	UGAUGACACCAAGCAAUACUA	Cleavage	Nucleic acid binding protein (AHRD V1 *-*- D7L2W2_ARALY); contains Interpro domain(s) IPR014560 Uncharacterised conserved protein UCP030333, DNA/RNA-binding Alba-related	1
aly-miR774a-5p.2	SlAlba2	5	-1	1	21	680	700	AGAUAUGGGUGACUAAUACUU	.:: :: :::..:..::.:.:	GAGCAUCAGUUGCUUAUGUUU	Cleavage	Ribonuclease P protein subunit p25 (AHRD V1 *--- RPP25_HUMAN); contains Interpro domain(s) IPR002775 Alba, DNA/RNA-binding protein	1
aly-miR823-5p	SlAlba2	5	-1	1	20	812	831	CUUGUAUGAUCACUAACCAU	::: : ::::::.:.:::	AUGACUUGUGAUCGUGCAAA	Cleavage	Ribonuclease P protein subunit p25 (AHRD V1 *--- RPP25_HUMAN); contains Interpro domain(s) IPR002775 Alba, DNA/RNA-binding protein	1
aly-miR833-5p	SlAlba2	5	-1	1	23	50	72	UGUUAGUCUGAACUCGGUCUAGU	::: .::: :.::: :::::	AGGAGAAUGAGAUUAGAAUAACA	Cleavage	Ribonuclease P protein subunit p25 (AHRD V1 *--- RPP25_HUMAN); contains Interpro domain(s) IPR002775 Alba, DNA/RNA-binding protein	1
aly-miR838-5p	SlAlba2	5	-1	1	21	714	734	UGCAAGAAUGAGAAGCAAAGC	:: ::: :..::.:::::	AAUUCACUUGUUGUUUUUGCA	Cleavage	Ribonuclease P protein subunit p25 (AHRD V1 *--- RPP25_HUMAN); contains Interpro domain(s) IPR002775 Alba, DNA/RNA-binding protein	1
aly-miR847-5p	SlAlba2	4	-1	1	21	108	128	UCUUGAUGAAGAGGAAUGGAA	: :.: ::.::::: :::.::	UACUAAUCUUCUUCUUCAGGA	Cleavage	Ribonuclease P protein subunit p25 (AHRD V1 *--- RPP25_HUMAN); contains Interpro domain(s) IPR002775 Alba, DNA/RNA-binding protein	1
aqc-miR408	SlAlba2	5	-1	1	21	625	645	UGCUCUGCCUCAUCCUUGUCU	:::.::: ::::.::::	GUACAGGGACGAGGUAGAGGU	Cleavage	Ribonuclease P protein subunit p25 (AHRD V1 *--- RPP25_HUMAN); contains Interpro domain(s) IPR002775 Alba, DNA/RNA-binding protein	1
aqc-miR477d	SlAlba2	5	-1	1	20	269	288	CUCUUCUUCAAAGGCUUCUA	.::: :.:: :::::::.	GGGAACCUUUAGAAGAAGGA	Translation	Ribonuclease P protein subunit p25 (AHRD V1 *--- RPP25_HUMAN); contains Interpro domain(s) IPR002775 Alba, DNA/RNA-binding protein	1
bdi-miR7719-5p	SlAlba2	5	-1	1	21	544	564	UCCGCCAUACAUGUUUCUAUC	.:.: :::: :::::.:::	CGUGGUAACAACUAUGGUGGA	Translation	Ribonuclease P protein subunit p25 (AHRD V1 *--- RPP25_HUMAN); contains Interpro domain(s) IPR002775 Alba, DNA/RNA-binding protein	1
bdi-miR7753-5p	SlAlba2	5	-1	1	21	418	438	AUGUCUUCUUCCUUGCUCAUC	:::: .: :::.::.:.:.:	UAUGAUUAUGGAGGAGGGCGU	Cleavage	Ribonuclease P protein subunit p25 (AHRD V1 *--- RPP25_HUMAN); contains Interpro domain(s) IPR002775 Alba, DNA/RNA-binding protein	1
bdi-miR7784a-3p	SlAlba2	5	-1	1	24	140	162	CAUAGACUUAUGAGACGAGUACAU	: : : :.: ::: ::::::::::	AAGAAAUUG-CUCUUAAGUCUAUG	Translation	Ribonuclease P protein subunit p25 (AHRD V1 *--- RPP25_HUMAN); contains Interpro domain(s) IPR002775 Alba, DNA/RNA-binding protein	1
bdi-miR7784b-3p	SlAlba2	5	-1	1	24	140	162	CAUAGACUUAUGAGACGAGUACAU	: : : :.: ::: ::::::::::	AAGAAAUUG-CUCUUAAGUCUAUG	Translation	Ribonuclease P protein subunit p25 (AHRD V1 *--- RPP25_HUMAN); contains Interpro domain(s) IPR002775 Alba, DNA/RNA-binding protein	1
bdi-miR9492	SlAlba2	5	-1	1	21	551	571	UAUCUACUCUGUCAUGGUAUC	::.:::...:::::: :.	ACAACUAUGGUGGAGUAGCUG	Cleavage	Ribonuclease P protein subunit p25 (AHRD V1 *--- RPP25_HUMAN); contains Interpro domain(s) IPR002775 Alba, DNA/RNA-binding protein	1
bra-miR172d-5p	SlAlba2	5	-1	1	21	432	452	GCAGCAUCAUUAAGAUUCACA	: : .:.::::::::: ::.	AGGGCGUUUUAAUGAUGGUGU	Cleavage	Ribonuclease P protein subunit p25 (AHRD V1 *--- RPP25_HUMAN); contains Interpro domain(s) IPR002775 Alba, DNA/RNA-binding protein	1
cpa-miR8146	SlAlba2	5	-1	1	24	100	123	AGGAAGACGGUGAGUAGAAGCCAA	: ::::: :.: :::::.:	ACUUAUGCUACUAAUCUUCUUCUU	Cleavage	Ribonuclease P protein subunit p25 (AHRD V1 *--- RPP25_HUMAN); contains Interpro domain(s) IPR002775 Alba, DNA/RNA-binding protein	1
cpa-miR8148	SlAlba2	4.5	-1	1	24	380	403	UGACUGGGUCUGCUGACGUGGCAU	:.:. :::::::.: :::::	CACCUAUUCCAGCAGAUCAAGUCA	Cleavage	Ribonuclease P protein subunit p25 (AHRD V1 *--- RPP25_HUMAN); contains Interpro domain(s) IPR002775 Alba, DNA/RNA-binding protein	1
gma-miR5780d	SlAlba2	5	-1	1	22	760	781	UGUUUUGAGUUUCUGAUAAAUU	::: :: :::::::::::. :	AAUCUAACAGAAACUCAAGCCC	Cleavage	Ribonuclease P protein subunit p25 (AHRD V1 *--- RPP25_HUMAN); contains Interpro domain(s) IPR002775 Alba, DNA/RNA-binding protein	1
gra-miR8659a	SlAlba2	5	-1	1	24	124	147	AAUUUUUUAAGGUUGUUUGUGGAA	: ::: .:.:: ::.:::::	CAGGAGAAAGGAUCUAAAGAAAUU	Cleavage	Ribonuclease P protein subunit p25 (AHRD V1 *--- RPP25_HUMAN); contains Interpro domain(s) IPR002775 Alba, DNA/RNA-binding protein	1
gra-miR8659b	SlAlba2	5	-1	1	24	124	147	AAUUUUUUAAGGUUGUUUGUGGAA	: ::: .:.:: ::.:::::	CAGGAGAAAGGAUCUAAAGAAAUU	Cleavage	Ribonuclease P protein subunit p25 (AHRD V1 *--- RPP25_HUMAN); contains Interpro domain(s) IPR002775 Alba, DNA/RNA-binding protein	1
hbr-miR6171	SlAlba2	4.5	-1	1	21	218	238	AUGUGGAUUGCUGAAGGCUUU	.::::::: ::. .:::::	UUGGCCUUCAUCAGAUCACAU	Translation	Ribonuclease P protein subunit p25 (AHRD V1 *--- RPP25_HUMAN); contains Interpro domain(s) IPR002775 Alba, DNA/RNA-binding protein	1
hme-miR-2765	SlAlba2	5	-1	1	22	550	571	UGGUAACUCCACCACCGUUGGC	:::: ::::::::: .:..	AACAACUAUGGUGGAGUAGCUG	Cleavage	Ribonuclease P protein subunit p25 (AHRD V1 *--- RPP25_HUMAN); contains Interpro domain(s) IPR002775 Alba, DNA/RNA-binding protein	1
hvu-miR6202	SlAlba2	5	-1	1	20	739	758	UGAAGAUUUUAAGCAUUGAA	:: ::::::. . ::::::	GUCCAUGCUUGUGUUCUUCA	Cleavage	Ribonuclease P protein subunit p25 (AHRD V1 *--- RPP25_HUMAN); contains Interpro domain(s) IPR002775 Alba, DNA/RNA-binding protein	1
mtr-miR2089-3p	SlAlba2	5	-1	1	22	96	117	AGGAUUGGUGUAAUAGGUAAAA	::::.::: .::.::::.:	CAUUACUUAUGCUACUAAUCUU	Translation	Ribonuclease P protein subunit p25 (AHRD V1 *--- RPP25_HUMAN); contains Interpro domain(s) IPR002775 Alba, DNA/RNA-binding protein	1
mtr-miR2585a	SlAlba2	5	-1	1	22	25	46	CAGGAUUAGCGAUUACAGGGAC	:: ::::.: :::::::	AAGCCAAUAAUUGAUAAUCCUA	Cleavage	Ribonuclease P protein subunit p25 (AHRD V1 *--- RPP25_HUMAN); contains Interpro domain(s) IPR002775 Alba, DNA/RNA-binding protein	1
mtr-miR2585b	SlAlba2	5	-1	1	22	25	46	CAGGAUUAGCGAUUACAGGGAC	:: ::::.: :::::::	AAGCCAAUAAUUGAUAAUCCUA	Cleavage	Ribonuclease P protein subunit p25 (AHRD V1 *--- RPP25_HUMAN); contains Interpro domain(s) IPR002775 Alba, DNA/RNA-binding protein	1
mtr-miR2636	SlAlba2	5	-1	1	21	397	417	UUUGGUUAGUGUGCUGAAUAU	: :::: ::::.:::.::	CAAGUCAGACCACUGACCGAA	Cleavage	Ribonuclease P protein subunit p25 (AHRD V1 *--- RPP25_HUMAN); contains Interpro domain(s) IPR002775 Alba, DNA/RNA-binding protein	1
mtr-miR5217	SlAlba2	5	-1	1	22	825	846	AGGUCAUUUUGAACGGUCGGAU	.: : : : :::::::::.::	GUGCAAAAGAUCAAAAUGAUCU	Cleavage	Ribonuclease P protein subunit p25 (AHRD V1 *--- RPP25_HUMAN); contains Interpro domain(s) IPR002775 Alba, DNA/RNA-binding protein	1
mtr-miR5271a	SlAlba2	5	-1	1	24	315	338	CGGAUAAUUGUGGUUACUAACGGU	.:: ::: :. ::::::::::	UGUGUCAGUCAUAACAAUUAUCCU	Cleavage	Ribonuclease P protein subunit p25 (AHRD V1 *--- RPP25_HUMAN); contains Interpro domain(s) IPR002775 Alba, DNA/RNA-binding protein	1
mtr-miR5271b	SlAlba2	5	-1	1	24	315	338	CGGAUAAUUGUGGUUACUAACGGU	.:: ::: :. ::::::::::	UGUGUCAGUCAUAACAAUUAUCCU	Cleavage	Ribonuclease P protein subunit p25 (AHRD V1 *--- RPP25_HUMAN); contains Interpro domain(s) IPR002775 Alba, DNA/RNA-binding protein	1
mtr-miR5752a	SlAlba2	3.5	-1	1	21	653	673	CAUUGUUUGGUUUAGUACAAA	::::::::.::::..::	AGGGUACUAAAUCAAAUGAUA	Cleavage	Ribonuclease P protein subunit p25 (AHRD V1 *--- RPP25_HUMAN); contains Interpro domain(s) IPR002775 Alba, DNA/RNA-binding protein	1
mtr-miR5752b	SlAlba2	3.5	-1	1	21	653	673	CAUUGUUUGGUUUAGUACAAA	::::::::.::::..::	AGGGUACUAAAUCAAAUGAUA	Cleavage	Ribonuclease P protein subunit p25 (AHRD V1 *--- RPP25_HUMAN); contains Interpro domain(s) IPR002775 Alba, DNA/RNA-binding protein	1
osa-miR166k-5p	SlAlba2	5	-1	1	21	394	414	GGUUUGUUGUCUGGCUCGAGG	:: ::.::::: :: .:::	GAUCAAGUCAGACCACUGACC	Cleavage	Ribonuclease P protein subunit p25 (AHRD V1 *--- RPP25_HUMAN); contains Interpro domain(s) IPR002775 Alba, DNA/RNA-binding protein	1
osa-miR1853-5p	SlAlba2	3.5	-1	1	24	684	707	AGCAUUCAAACAUUCCCAAUUACC	:.::: :::::::::::.:	AUCAGUUGCUUAUGUUUGAAUGUU	Cleavage	Ribonuclease P protein subunit p25 (AHRD V1 *--- RPP25_HUMAN); contains Interpro domain(s) IPR002775 Alba, DNA/RNA-binding protein	1
osa-miR2055	SlAlba2	5	-1	1	21	110	130	UUUCCUUGGGAAGGUGGUUUC	::.: .::::.. ::::.:	CUAAUCUUCUUCUUCAGGAGA	Cleavage	Ribonuclease P protein subunit p25 (AHRD V1 *--- RPP25_HUMAN); contains Interpro domain(s) IPR002775 Alba, DNA/RNA-binding protein	1
osa-miR419	SlAlba2	3.5	-1	1	21	210	230	UGAUGAAUGCUGACGAUGUUG	:: :::::..:: :::::::	GAAGAUCGUUGGCCUUCAUCA	Cleavage	Ribonuclease P protein subunit p25 (AHRD V1 *--- RPP25_HUMAN); contains Interpro domain(s) IPR002775 Alba, DNA/RNA-binding protein	1
ppt-miR1039-5p	SlAlba2	3.5	-1	1	21	124	143	UCUUUGGGUCUUUCUCUCCUG	::::::: ::.::.:.:::::	CAGGAGA-AAGGAUCUAAAGA	Cleavage	Ribonuclease P protein subunit p25 (AHRD V1 *--- RPP25_HUMAN); contains Interpro domain(s) IPR002775 Alba, DNA/RNA-binding protein	1
ppt-miR1048-5p	SlAlba2	4.5	-1	1	21	736	756	UAGAACAUGAGUGUAGACGAC	.::: :..::..::::::	UGUGUCCAUGCUUGUGUUCUU	Cleavage	Ribonuclease P protein subunit p25 (AHRD V1 *--- RPP25_HUMAN); contains Interpro domain(s) IPR002775 Alba, DNA/RNA-binding protein	1
ppt-miR419	SlAlba2	5	-1	1	21	210	230	UGAUGAAUGAUGACGAUGUAU	: :::::.. : :::::::	GAAGAUCGUUGGCCUUCAUCA	Translation	Ribonuclease P protein subunit p25 (AHRD V1 *--- RPP25_HUMAN); contains Interpro domain(s) IPR002775 Alba, DNA/RNA-binding protein	1
ptc-miR6466-5p	SlAlba2	5	-1	1	21	682	702	UCUGGUAUGAGCAUUUGAUGA	:::::. ::::.::... ::	GCAUCAGUUGCUUAUGUUUGA	Cleavage	Ribonuclease P protein subunit p25 (AHRD V1 *--- RPP25_HUMAN); contains Interpro domain(s) IPR002775 Alba, DNA/RNA-binding protein	1
ptc-miR7814	SlAlba2	4.5	-1	1	21	827	847	UAGAUUGUUUUUAUGCUUUGA	:::: :: ::::..:::::	GCAAAAGAUCAAAAUGAUCUA	Cleavage	Ribonuclease P protein subunit p25 (AHRD V1 *--- RPP25_HUMAN); contains Interpro domain(s) IPR002775 Alba, DNA/RNA-binding protein	1
pti-miR5483	SlAlba2	5	-1	1	23	124	146	AUUUUUUUGGAUCGUGUGAUAUA	: : ::::.:::.::::	CAGGAGAAAGGAUCUAAAGAAAU	Cleavage	Ribonuclease P protein subunit p25 (AHRD V1 *--- RPP25_HUMAN); contains Interpro domain(s) IPR002775 Alba, DNA/RNA-binding protein	1
sly-miR5303	SlAlba2	4	-1	1	21	742	762	UUUUUGAAGAGUUCGAGCAAC	::::.: ..:::::::::	CAUGCUUGUGUUCUUCAAAAU	Cleavage	Ribonuclease P protein subunit p25 (AHRD V1 *--- RPP25_HUMAN); contains Interpro domain(s) IPR002775 Alba, DNA/RNA-binding protein	1
smo-miR1088-3p	SlAlba2	4.5	-1	1	21	472	492	GCGUGCUCUUUUUCUUCUGUC	:.:.:: :.:::.::: :::.	GGCGGAUGGAAAGGAGGACGU	Cleavage	Ribonuclease P protein subunit p25 (AHRD V1 *--- RPP25_HUMAN); contains Interpro domain(s) IPR002775 Alba, DNA/RNA-binding protein	1
vvi-miR3633b-5p	SlAlba2	2.5	-1	1	21	369	389	GGAAUGGGUGGCUGGGAUCUA	.:.: .::::::::.:::::	CGGGUAUCAGCCACCUAUUCC	Cleavage	Ribonuclease P protein subunit p25 (AHRD V1 *--- RPP25_HUMAN); contains Interpro domain(s) IPR002775 Alba, DNA/RNA-binding protein	1
zma-miR164e-3p	SlAlba2	5	-1	1	21	463	483	CAUGUGUCCGCCCUCUCCACC	:::::::::::::::.. :	GGUGGAGAGGGCGGAUGGAAA	Cleavage	Ribonuclease P protein subunit p25 (AHRD V1 *--- RPP25_HUMAN); contains Interpro domain(s) IPR002775 Alba, DNA/RNA-binding protein	1
ahy-miR3513-5p	SlAlba3	5	-1	1	21	871	891	UUAAUUUCUGAGUUUGUCAUC	::: .::. ::::.::::	CUUGAAGAAUACAGAGAUUAU	Translation	Ribonuclease P protein subunit p25 (AHRD V1 *--- RPP25_RAT); contains Interpro domain(s) IPR002775 Alba, DNA/RNA-binding protein	1
aly-miR156h-5p	SlAlba3	5	-1	1	20	1017	1036	UGACAGAAGAAAGAGAGCAC	::.:.:::::. :.:::.	AUGUUUUCUUUUCUUUGUUU	Cleavage	Ribonuclease P protein subunit p25 (AHRD V1 *--- RPP25_RAT); contains Interpro domain(s) IPR002775 Alba, DNA/RNA-binding protein	1
aly-miR399f-5p	SlAlba3	4.5	-1	1	22	1140	1161	GGGCAAGAUCACCAUUGGCAGA	.::.:: ::::::::..:	AUGUUCAGUGUUGAUCUUGUUC	Cleavage	Ribonuclease P protein subunit p25 (AHRD V1 *--- RPP25_RAT); contains Interpro domain(s) IPR002775 Alba, DNA/RNA-binding protein	1
aly-miR858-3p	SlAlba3	4.5	-1	1	21	1052	1072	GGUCGAGCAGACAACGAAGAU	:::::. :: ::::::.::..	AUCUUUAUUCUCUGCUUGAUU	Cleavage	Ribonuclease P protein subunit p25 (AHRD V1 *--- RPP25_RAT); contains Interpro domain(s) IPR002775 Alba, DNA/RNA-binding protein	1
aqc-miR477d	SlAlba3	4.5	-1	1	20	362	381	CUCUUCUUCAAAGGCUUCUA	.::: :: :::::::::.	GGGAACCCCUUGAAGAAGGU	Cleavage	Ribonuclease P protein subunit p25 (AHRD V1 *--- RPP25_RAT); contains Interpro domain(s) IPR002775 Alba, DNA/RNA-binding protein	1
aqu-miR-2021-3p	SlAlba3	5	-1	1	21	457	477	UGGUGGUCGGUGUUUCGUGGA	:...:....::: :::::::	GCUGUGGGGUACCAACCACCA	Cleavage	Ribonuclease P protein subunit p25 (AHRD V1 *--- RPP25_RAT); contains Interpro domain(s) IPR002775 Alba, DNA/RNA-binding protein	1
ath-miR156h	SlAlba3	5	-1	1	20	1017	1036	UGACAGAAGAAAGAGAGCAC	::.:.:::::. :.:::.	AUGUUUUCUUUUCUUUGUUU	Cleavage	Ribonuclease P protein subunit p25 (AHRD V1 *--- RPP25_RAT); contains Interpro domain(s) IPR002775 Alba, DNA/RNA-binding protein	1
ath-miR413	SlAlba3	5	-1	1	21	482	502	AUAGUUUCUCUUGUUCUGCAC	::::: ::.: :::: :.:	CAGCAGACCAGGUGAAAGUGU	Cleavage	Ribonuclease P protein subunit p25 (AHRD V1 *--- RPP25_RAT); contains Interpro domain(s) IPR002775 Alba, DNA/RNA-binding protein	1
ath-miR414	SlAlba3	3.5	-1	1	21	618	638	UCAUCUUCAUCAUCAUCGUCA	:.:::::::.::.. ::::	GUAUGAUGAUGGUGGGUAUGA	Cleavage	Ribonuclease P protein subunit p25 (AHRD V1 *--- RPP25_RAT); contains Interpro domain(s) IPR002775 Alba, DNA/RNA-binding protein	1
ath-miR4228-5p	SlAlba3	4.5	-1	1	21	234	254	AUAGCCUUGAACGCCGUCGUU	::. :.::::::::: ::	GGAGAUCGUGUUCAAGGCAAU	Cleavage	Ribonuclease P protein subunit p25 (AHRD V1 *--- RPP25_RAT); contains Interpro domain(s) IPR002775 Alba, DNA/RNA-binding protein	1
ath-miR8184	SlAlba3	4.5	-1	1	21	961	981	UUUGGUCUGAUUACGAAUGUA	: .:: .::::::::: .:.:	UCUAUCUGUAAUCAGAGUAGA	Cleavage	Ribonuclease P protein subunit p25 (AHRD V1 *--- RPP25_RAT); contains Interpro domain(s) IPR002775 Alba, DNA/RNA-binding protein	1
ath-miR854a	SlAlba3	4.5	-1	1	21	71	91	GAUGAGGAUAGGGAGGAGGAG	.::. :::.:::.::.::	AAUCUUAUCCUUAUUCUUAUA	Cleavage	Ribonuclease P protein subunit p25 (AHRD V1 *--- RPP25_RAT); contains Interpro domain(s) IPR002775 Alba, DNA/RNA-binding protein	1
ath-miR854b	SlAlba3	4.5	-1	1	21	71	91	GAUGAGGAUAGGGAGGAGGAG	.::. :::.:::.::.::	AAUCUUAUCCUUAUUCUUAUA	Cleavage	Ribonuclease P protein subunit p25 (AHRD V1 *--- RPP25_RAT); contains Interpro domain(s) IPR002775 Alba, DNA/RNA-binding protein	1
ath-miR867	SlAlba3	5	-1	1	21	228	248	UUGAACAUGGUUUAUUAGGAA	:: :. :.:.:.:::::::	AUCAGAGGAGAUCGUGUUCAA	Cleavage	Ribonuclease P protein subunit p25 (AHRD V1 *--- RPP25_RAT); contains Interpro domain(s) IPR002775 Alba, DNA/RNA-binding protein	1
bdi-miR5198	SlAlba3	5	-1	1	21	1044	1064	GGGGAAAAGAGAUUGAGGGAG	.:.:: ::::.: :::.:.	UAUCUUCUAUCUUUAUUCUCU	Cleavage	Ribonuclease P protein subunit p25 (AHRD V1 *--- RPP25_RAT); contains Interpro domain(s) IPR002775 Alba, DNA/RNA-binding protein	1
bdi-miR7741-5p.1	SlAlba3	4.5	-1	1	21	741	761	UUUUAAUUGUGGAAGCUCUUG	... .:::::.::::: ::.:	UGGUGGCUUCUACAAUCAAGA	Cleavage	Ribonuclease P protein subunit p25 (AHRD V1 *--- RPP25_RAT); contains Interpro domain(s) IPR002775 Alba, DNA/RNA-binding protein	1
cca-miR6108f	SlAlba3	5	-1	1	21	71	91	UAUGGUGAGAAGGGUAAGAAG	:::::.:::: :. ..:::	AAUCUUAUCCUUAUUCUUAUA	Cleavage	Ribonuclease P protein subunit p25 (AHRD V1 *--- RPP25_RAT); contains Interpro domain(s) IPR002775 Alba, DNA/RNA-binding protein	1
cre-miR1158	SlAlba3	5	-1	1	20	307	326	ACUUGGAGGAGGCCACUGGC	... :::.::.: ::::::	AUUGUUGGUCUUCACCAAGU	Cleavage	Ribonuclease P protein subunit p25 (AHRD V1 *--- RPP25_RAT); contains Interpro domain(s) IPR002775 Alba, DNA/RNA-binding protein	1
cre-miR1169-3p	SlAlba3	4.5	-1	1	21	316	336	UGUGGAUGUUGCUUGCUGGAU	:.:: ::::.:::.::.:.	CUUCACCAAGUAACGUCUAUU	Cleavage	Ribonuclease P protein subunit p25 (AHRD V1 *--- RPP25_RAT); contains Interpro domain(s) IPR002775 Alba, DNA/RNA-binding protein	1
csi-miR3951	SlAlba3	5	-1	1	21	1114	1134	UAGAUAAAGAUGAGAGAAAAA	: ::: .:..:::::.:.:.	UCUUUGAUUUGUCUUUGUUUG	Cleavage	Ribonuclease P protein subunit p25 (AHRD V1 *--- RPP25_RAT); contains Interpro domain(s) IPR002775 Alba, DNA/RNA-binding protein	1
ghr-miR7492a	SlAlba3	5	-1	1	23	878	900	CUAUAGAACAUGAUCUUUAGCGG	:.::::.:::: ::::.	AAUACAGAGAUUAUGUGCUAUGA	Cleavage	Ribonuclease P protein subunit p25 (AHRD V1 *--- RPP25_RAT); contains Interpro domain(s) IPR002775 Alba, DNA/RNA-binding protein	1
ghr-miR7492b	SlAlba3	5	-1	1	23	878	900	CUAUAGAACAUGAUCUUUAGCGG	:.::::.:::: ::::.	AAUACAGAGAUUAUGUGCUAUGA	Cleavage	Ribonuclease P protein subunit p25 (AHRD V1 *--- RPP25_RAT); contains Interpro domain(s) IPR002775 Alba, DNA/RNA-binding protein	1
ghr-miR7493	SlAlba3	5	-1	1	24	1121	1144	AAUAUUUUAAUAAUUCAAUCGUCA	:: . ::.::.::::.::	UUUGUCUUUGUUUGUUGAAAUGUU	Cleavage	Ribonuclease P protein subunit p25 (AHRD V1 *--- RPP25_RAT); contains Interpro domain(s) IPR002775 Alba, DNA/RNA-binding protein	1
gma-miR4399	SlAlba3	5	-1	1	22	1117	1138	UUAACGAAAAAGGACUAACGAC	:: :::.:: ::.:::.:	UUGAUUUGUCUUUGUUUGUUGA	Cleavage	Ribonuclease P protein subunit p25 (AHRD V1 *--- RPP25_RAT); contains Interpro domain(s) IPR002775 Alba, DNA/RNA-binding protein	1
gma-miR4415a-5p	SlAlba3	5	-1	1	21	1029	1049	AAGUUGUGAUGAGAAUCAAUG	: ::: ::.:::: :.: :::	CUUUGUUUUUCAUGAUAUCUU	Cleavage	Ribonuclease P protein subunit p25 (AHRD V1 *--- RPP25_RAT); contains Interpro domain(s) IPR002775 Alba, DNA/RNA-binding protein	1
gma-miR9722	SlAlba3	4.5	-1	1	21	1016	1036	UAAUAGAGGGAAGAAGAUGAA	..:.:::::..::.:.::	GAUGUUUUCUUUUCUUUGUUU	Cleavage	Ribonuclease P protein subunit p25 (AHRD V1 *--- RPP25_RAT); contains Interpro domain(s) IPR002775 Alba, DNA/RNA-binding protein	1
gma-miR9730	SlAlba3	4	-1	1	22	626	647	CGAUUGCUGUCAUAACUGCUGC	..:..: :::::. :::::::	AUGGUGGGUAUGAUCGCAAUCG	Cleavage	Ribonuclease P protein subunit p25 (AHRD V1 *--- RPP25_RAT); contains Interpro domain(s) IPR002775 Alba, DNA/RNA-binding protein	1
gma-miR9736	SlAlba3	4	-1	1	21	1020	1040	UGAAAGACAAACAAAGGUGGG	... :.::: :::::.:::::	UUUUCUUUUCUUUGUUUUUCA	Cleavage	Ribonuclease P protein subunit p25 (AHRD V1 *--- RPP25_RAT); contains Interpro domain(s) IPR002775 Alba, DNA/RNA-binding protein	1
gra-miR7504n	SlAlba3	5	-1	1	24	58	81	AGGAUAAAAUUACUGAUGUGGCAU	:.: .: :::: :::::::	GAAGAAUAAUACUAAUCUUAUCCU	Cleavage	Ribonuclease P protein subunit p25 (AHRD V1 *--- RPP25_RAT); contains Interpro domain(s) IPR002775 Alba, DNA/RNA-binding protein	1
gra-miR7506b	SlAlba3	5	-1	1	20	901	920	CUGGGACAUGGCGUUGGCAA	:::: .: ::::::.:.:	GUGCCUGCUCCAUGUUCUAU	Cleavage	Ribonuclease P protein subunit p25 (AHRD V1 *--- RPP25_RAT); contains Interpro domain(s) IPR002775 Alba, DNA/RNA-binding protein	1
gra-miR8712	SlAlba3	5	-1	1	24	183	206	AUAUCAUUGGUGAUGUAUCGUCUU	:: : ::.:::::. ::: :::	GCGAAGCUAUAUCACUUAUGCUAU	Cleavage	Ribonuclease P protein subunit p25 (AHRD V1 *--- RPP25_RAT); contains Interpro domain(s) IPR002775 Alba, DNA/RNA-binding protein	1
gra-miR8750	SlAlba3	5	-1	1	24	596	619	UCUUAGUUGGCAUAUACUCAAGGA	::. : ::::::..::.::	GAAAUGGAUUUAUGCCGGCUGAGU	Cleavage	Ribonuclease P protein subunit p25 (AHRD V1 *--- RPP25_RAT); contains Interpro domain(s) IPR002775 Alba, DNA/RNA-binding protein	1
hme-miR-307	SlAlba3	5	-1	1	22	835	856	CACAACCUCCUUGAGUGAGCGA	:: :. ::::::::: :::	GGGCCGAUCCAAGGAGGUGGUG	Cleavage	Ribonuclease P protein subunit p25 (AHRD V1 *--- RPP25_RAT); contains Interpro domain(s) IPR002775 Alba, DNA/RNA-binding protein	1
hvu-miR6190	SlAlba3	4.5	-1	1	21	1013	1033	CGAGGAAAGGAAGAAGCCAUG	.:: . :.:::.::::.:.:	GGUGAUGUUUUCUUUUCUUUG	Cleavage	Ribonuclease P protein subunit p25 (AHRD V1 *--- RPP25_RAT); contains Interpro domain(s) IPR002775 Alba, DNA/RNA-binding protein	1
mdm-miR396a	SlAlba3	5	-1	1	21	445	465	UUCCACAGCUUUCUUGAACAG	::: .::::: :::::::..	CUGGAUAAGAAUGCUGUGGGG	Translation	Ribonuclease P protein subunit p25 (AHRD V1 *--- RPP25_RAT); contains Interpro domain(s) IPR002775 Alba, DNA/RNA-binding protein	1
mtr-miR2592a-3p	SlAlba3	5	-1	1	21	906	927	GAAAAACAU-GAAUGUCGAGCG	.:::: :..::: :::::::::	UGCUCCAUGUUCUAUGUUUUUC	Cleavage	Ribonuclease P protein subunit p25 (AHRD V1 *--- RPP25_RAT); contains Interpro domain(s) IPR002775 Alba, DNA/RNA-binding protein	1
mtr-miR5239	SlAlba3	5	-1	1	21	1044	1064	UGGGAGAAAAGAUAGAAUGUG	.:. :::::::::: .::.:	UAUCUUCUAUCUUUAUUCUCU	Cleavage	Ribonuclease P protein subunit p25 (AHRD V1 *--- RPP25_RAT); contains Interpro domain(s) IPR002775 Alba, DNA/RNA-binding protein	1
mtr-miR5561-5p	SlAlba3	5	-1	1	21	1122	1142	CAUUUGGAGAGACAUAGACAA	:::::: :::.: :. :::::	UUGUCUUUGUUUGUUGAAAUG	Cleavage	Ribonuclease P protein subunit p25 (AHRD V1 *--- RPP25_RAT); contains Interpro domain(s) IPR002775 Alba, DNA/RNA-binding protein	1
osa-miR166g-5p	SlAlba3	5	-1	1	21	1112	1132	AAUGGAGGCUGAUCCAAGAUC	:::: :::. :.::...::	AUUCUUUGAUUUGUCUUUGUU	Translation	Ribonuclease P protein subunit p25 (AHRD V1 *--- RPP25_RAT); contains Interpro domain(s) IPR002775 Alba, DNA/RNA-binding protein	1
osa-miR1868	SlAlba3	5	-1	1	24	1020	1043	UCACGGAAAACGAGGGAGCAGCCA	.:.:.:.:::::.: :::	UUUUCUUUUCUUUGUUUUUCAUGA	Cleavage	Ribonuclease P protein subunit p25 (AHRD V1 *--- RPP25_RAT); contains Interpro domain(s) IPR002775 Alba, DNA/RNA-binding protein	1
osa-miR413	SlAlba3	4.5	-1	1	21	482	502	CUAGUUUCACUUGUUCUGCAC	::::: ::.:::::: :.	CAGCAGACCAGGUGAAAGUGU	Cleavage	Ribonuclease P protein subunit p25 (AHRD V1 *--- RPP25_RAT); contains Interpro domain(s) IPR002775 Alba, DNA/RNA-binding protein	1
osa-miR414	SlAlba3	3	-1	1	21	618	638	UCAUCCUCAUCAUCAUCGUCC	: :.:::::::.::.: ::::	GUAUGAUGAUGGUGGGUAUGA	Cleavage	Ribonuclease P protein subunit p25 (AHRD V1 *--- RPP25_RAT); contains Interpro domain(s) IPR002775 Alba, DNA/RNA-binding protein	1
osa-miR5339	SlAlba3	5	-1	1	21	948	968	CAGAUAGAGAAUCUUCUCAGA	:: ::.:: ::::::::	UAACAGUAGGUUAUCUAUCUG	Cleavage	Ribonuclease P protein subunit p25 (AHRD V1 *--- RPP25_RAT); contains Interpro domain(s) IPR002775 Alba, DNA/RNA-binding protein	1
osa-miR5500	SlAlba3	5	-1	1	22	1084	1105	AUCACUGAUGAAAUCUUGCGGC	:.. :::::.:.:::::	CAAGUGUAAUUUCGUUAGUGAG	Cleavage	Ribonuclease P protein subunit p25 (AHRD V1 *--- RPP25_RAT); contains Interpro domain(s) IPR002775 Alba, DNA/RNA-binding protein	1
osa-miR5508	SlAlba3	5	-1	1	21	948	968	UAGAUGGCUGAUCUGGUGUGG	::: .::.:.: :.::::.	UAACAGUAGGUUAUCUAUCUG	Cleavage	Ribonuclease P protein subunit p25 (AHRD V1 *--- RPP25_RAT); contains Interpro domain(s) IPR002775 Alba, DNA/RNA-binding protein	1
osa-miR5544	SlAlba3	5	-1	1	22	897	918	AGAACACGGAGUAGAAGUUGGU	:. :.. ::.:::: ::::::	AUGAGUGCCUGCUCCAUGUUCU	Cleavage	Ribonuclease P protein subunit p25 (AHRD V1 *--- RPP25_RAT); contains Interpro domain(s) IPR002775 Alba, DNA/RNA-binding protein	1
ppt-miR1039-5p	SlAlba3	4	-1	1	21	567	587	UCUUUGGGUCUUUCUCUCCUG	.: ::.:.:::..:::.::.	AGGAAGGGGAAGGUCCAGAGG	Cleavage	Ribonuclease P protein subunit p25 (AHRD V1 *--- RPP25_RAT); contains Interpro domain(s) IPR002775 Alba, DNA/RNA-binding protein	1
ppt-miR1046-3p	SlAlba3	5	-1	1	21	911	931	UGGUGAAAAAUAUGAAAAAUC	:: :: .::.:::::::..	CAUGUUCUAUGUUUUUCAUUC	Cleavage	Ribonuclease P protein subunit p25 (AHRD V1 *--- RPP25_RAT); contains Interpro domain(s) IPR002775 Alba, DNA/RNA-binding protein	1
ppt-miR1222d	SlAlba3	4	-1	1	21	355	375	UUUAAGGGGUUCACUGGUAUA	:::: : :::::::::.::	GAUACAUGGGAACCCCUUGAA	Cleavage	Ribonuclease P protein subunit p25 (AHRD V1 *--- RPP25_RAT); contains Interpro domain(s) IPR002775 Alba, DNA/RNA-binding protein	1
ppt-miR414	SlAlba3	5	-1	1	21	612	632	UCAUCCUCAUCAUCCUCGUCC	:: .::: ::::::: :.::.	GGCUGAGUAUGAUGAUGGUGG	Cleavage	Ribonuclease P protein subunit p25 (AHRD V1 *--- RPP25_RAT); contains Interpro domain(s) IPR002775 Alba, DNA/RNA-binding protein	1
ptc-miR6475	SlAlba3	5	-1	1	21	1023	1043	UCUUGAGAAGUAAAGAACGAC	::::::..::.::: ::	UCUUUUCUUUGUUUUUCAUGA	Cleavage	Ribonuclease P protein subunit p25 (AHRD V1 *--- RPP25_RAT); contains Interpro domain(s) IPR002775 Alba, DNA/RNA-binding protein	1
ptc-miR7840	SlAlba3	5	-1	1	21	926	946	CAAGGAGUAAUUAGUGACAUC	::..::.::::::: ::	UCAUUCGUUAGUUACUCCGUG	Cleavage	Ribonuclease P protein subunit p25 (AHRD V1 *--- RPP25_RAT); contains Interpro domain(s) IPR002775 Alba, DNA/RNA-binding protein	1
rgl-miR7807b-3p	SlAlba3	5	-1	1	22	484	505	UUGAGAUUUUCAUAUAGUUACU	.:: : .:::::.: ::::	GCAGACCAGGUGAAAGUGUCAA	Cleavage	Ribonuclease P protein subunit p25 (AHRD V1 *--- RPP25_RAT); contains Interpro domain(s) IPR002775 Alba, DNA/RNA-binding protein	1
sbi-miR5566	SlAlba3	5	-1	1	21	840	860	UCAGCAUCACCUCCCUGUUGU	:: :::::::.:::: :	GAUCCAAGGAGGUGGUGCUUA	Cleavage	Ribonuclease P protein subunit p25 (AHRD V1 *--- RPP25_RAT); contains Interpro domain(s) IPR002775 Alba, DNA/RNA-binding protein	1
vvi-miR156e	SlAlba3	5	-1	1	20	1017	1036	UGACAGAGGAGAGUGAGCAC	::.:. ::.:.::.:::.	AUGUUUUCUUUUCUUUGUUU	Cleavage	Ribonuclease P protein subunit p25 (AHRD V1 *--- RPP25_RAT); contains Interpro domain(s) IPR002775 Alba, DNA/RNA-binding protein	1
zma-miR169m-3p	SlAlba3	5	-1	1	20	166	185	GGCAUCCAUUCUUGGCUAAG	:::.::.:.: ::::::	ACUAGUCAGGGAAGGAUGCG	Cleavage	Ribonuclease P protein subunit p25 (AHRD V1 *--- RPP25_RAT); contains Interpro domain(s) IPR002775 Alba, DNA/RNA-binding protein	1
zma-miR2275d-5p	SlAlba3	4.5	-1	1	21	1018	1038	AGAGUUGGAGGAAAGAAAACU	:::::::::.::... .:.:	UGUUUUCUUUUCUUUGUUUUU	Cleavage	Ribonuclease P protein subunit p25 (AHRD V1 *--- RPP25_RAT); contains Interpro domain(s) IPR002775 Alba, DNA/RNA-binding protein	1
zma-miR408b-5p	SlAlba3	5	-1	1	21	1110	1130	CAGGGACGAGGCAGAGCAUGG	::: ::.:: .:.:::..::	ACAUUCUUUGAUUUGUCUUUG	Translation	Ribonuclease P protein subunit p25 (AHRD V1 *--- RPP25_RAT); contains Interpro domain(s) IPR002775 Alba, DNA/RNA-binding protein	1
ata-miR171a-5p	SlAlba4	5	-1	1	20	388	407	UGGUAUUGUUUCGGCUCAUG	:: ::::: .: :.::::::	CAGGAGCCCGACCGAUACCA	Cleavage	Nucleic acid binding protein (AHRD V1 ***- D7LGX9_ARALY); contains Interpro domain(s) IPR014560 Uncharacterised conserved protein UCP030333, DNA/RNA-binding Alba-related	1
ata-miR6201-5p	SlAlba4	4.5	-1	1	22	149	170	UGACCCUGAGGCACUCAUACCG	:::::::.::::: : ::	CAAGAUGAGUGUCUCAGAGACA	Cleavage	Nucleic acid binding protein (AHRD V1 ***- D7LGX9_ARALY); contains Interpro domain(s) IPR014560 Uncharacterised conserved protein UCP030333, DNA/RNA-binding Alba-related	1
ata-miR9863a-5p	SlAlba4	3.5	-1	1	21	342	362	UGUUAUGAUCUGCUUCUCAUC	: ::::::: :::::: .:::	GUUGAGAAGAAGAUCAGGACA	Cleavage	Nucleic acid binding protein (AHRD V1 ***- D7LGX9_ARALY); contains Interpro domain(s) IPR014560 Uncharacterised conserved protein UCP030333, DNA/RNA-binding Alba-related	1
ata-miR9863b-5p	SlAlba4	3.5	-1	1	21	342	362	UGUUAUGAUCUGCUUCUCAUC	: ::::::: :::::: .:::	GUUGAGAAGAAGAUCAGGACA	Cleavage	Nucleic acid binding protein (AHRD V1 ***- D7LGX9_ARALY); contains Interpro domain(s) IPR014560 Uncharacterised conserved protein UCP030333, DNA/RNA-binding Alba-related	1
ath-miR167c-3p	SlAlba4	5	-1	1	23	621	643	UAGGUCAUGCUGGUAGUUUCACC	::: : :::::::...::	UAAAAAAAAAGCAGCAUGGUUUA	Cleavage	Nucleic acid binding protein (AHRD V1 ***- D7LGX9_ARALY); contains Interpro domain(s) IPR014560 Uncharacterised conserved protein UCP030333, DNA/RNA-binding Alba-related	1
ath-miR5017-3p	SlAlba4	5	-1	1	21	18	38	UUAUACCAAAUUAAUAGCAAA	: ::.:: :. ::: ::::::	UCUGUUACUGUUUUAGUAUAA	Translation	Nucleic acid binding protein (AHRD V1 ***- D7LGX9_ARALY); contains Interpro domain(s) IPR014560 Uncharacterised conserved protein UCP030333, DNA/RNA-binding Alba-related	1
ath-miR5020b	SlAlba4	4.5	-1	1	21	208	229	AUGGCAUGAAAGAAG-GUGAGA	:::: :::::::.:::..:	AAUCACUCUUCUUUUAUGUUAA	Cleavage	Nucleic acid binding protein (AHRD V1 ***- D7LGX9_ARALY); contains Interpro domain(s) IPR014560 Uncharacterised conserved protein UCP030333, DNA/RNA-binding Alba-related	1
ath-miR5020c	SlAlba4	5	-1	1	21	207	228	UGGCAUGGAAGAAG-GUGAGAC	:::: ::::::..:::..:	AAAUCACUCUUCUUUUAUGUUA	Cleavage	Nucleic acid binding protein (AHRD V1 ***- D7LGX9_ARALY); contains Interpro domain(s) IPR014560 Uncharacterised conserved protein UCP030333, DNA/RNA-binding Alba-related	1
ath-miR5648-5p	SlAlba4	5	-1	1	22	499	520	UUUGGAAAUAUUUGGCUUGACU	:: .: :..: ::::::::::	AGCAGAACUGAUUAUUUCCAAA	Translation	Nucleic acid binding protein (AHRD V1 ***- D7LGX9_ARALY); contains Interpro domain(s) IPR014560 Uncharacterised conserved protein UCP030333, DNA/RNA-binding Alba-related	1
bdi-miR5185l-3p	SlAlba4	4	-1	1	21	217	237	UUUGGAGAUUGACUUAGAAGC	:::.:: ::.::::::. ::	UCUUUUAUGUUAAUCUCUCAA	Cleavage	Nucleic acid binding protein (AHRD V1 ***- D7LGX9_ARALY); contains Interpro domain(s) IPR014560 Uncharacterised conserved protein UCP030333, DNA/RNA-binding Alba-related	1
bra-miR9559-5p	SlAlba4	5	-1	1	21	172	192	UUUGGAUUUUGGUCAUUGUUG	.: .: :: ::.:::::::.	AGAAGAAGAACAGAAUCCAAG	Cleavage	Nucleic acid binding protein (AHRD V1 ***- D7LGX9_ARALY); contains Interpro domain(s) IPR014560 Uncharacterised conserved protein UCP030333, DNA/RNA-binding Alba-related	1
csi-miR479	SlAlba4	5	-1	1	22	388	409	UGUGAUAUUGGUUCGGCUCAUC	: ::::: .:::.::: :: :	CAGGAGCCCGACCGAUACCAAA	Cleavage	Nucleic acid binding protein (AHRD V1 ***- D7LGX9_ARALY); contains Interpro domain(s) IPR014560 Uncharacterised conserved protein UCP030333, DNA/RNA-binding Alba-related	1
ddi-miR-7100	SlAlba4	3.5	-1	1	21	18	38	UUAUAAUGAAACGGUAAUGAU	..::::.::::.: :::::	UCUGUUACUGUUUUAGUAUAA	Cleavage	Nucleic acid binding protein (AHRD V1 ***- D7LGX9_ARALY); contains Interpro domain(s) IPR014560 Uncharacterised conserved protein UCP030333, DNA/RNA-binding Alba-related	1
gma-miR1534	SlAlba4	5	-1	1	20	91	110	UAUUUUGGGUAAAUAGUCAU	:: : .::::::..::.::	AUUAGGGUUUACCUGAAGUA	Cleavage	Nucleic acid binding protein (AHRD V1 ***- D7LGX9_ARALY); contains Interpro domain(s) IPR014560 Uncharacterised conserved protein UCP030333, DNA/RNA-binding Alba-related	1
gma-miR4344	SlAlba4	5	-1	1	24	271	294	AAGUAGACAUUCUAAGACGUUGCU	::::.:.::: :::.::	UCUCUGCUCUUGGGAUGGCUAUUU	Cleavage	Nucleic acid binding protein (AHRD V1 ***- D7LGX9_ARALY); contains Interpro domain(s) IPR014560 Uncharacterised conserved protein UCP030333, DNA/RNA-binding Alba-related	1
gma-miR5773	SlAlba4	3.5	-1	1	22	590	611	UUUUUAAAAGGUUCAGUUAGGU	..:::.: .:.:::::..:::	CUUUAAUUUGAUCUUUUGGAAA	Cleavage	Nucleic acid binding protein (AHRD V1 ***- D7LGX9_ARALY); contains Interpro domain(s) IPR014560 Uncharacterised conserved protein UCP030333, DNA/RNA-binding Alba-related	1
gma-miR9742	SlAlba4	5	-1	1	21	618	638	UGUGUUGUUUGUUUUGUAGCA	: .:: :::: ::.::.::..	UUUUAAAAAAAAAGCAGCAUG	Translation	Nucleic acid binding protein (AHRD V1 ***- D7LGX9_ARALY); contains Interpro domain(s) IPR014560 Uncharacterised conserved protein UCP030333, DNA/RNA-binding Alba-related	1
gma-miR9752	SlAlba4	4.5	-1	1	21	479	499	UGCUUCUUCUUUUCCCUGUUU	::::.:::: :: .::.::::	AAACGGGGACAAUGAGGAGCA	Cleavage	Nucleic acid binding protein (AHRD V1 ***- D7LGX9_ARALY); contains Interpro domain(s) IPR014560 Uncharacterised conserved protein UCP030333, DNA/RNA-binding Alba-related	1
gra-miR7505b	SlAlba4	5	-1	1	21	505	525	ACAGCUUUAGAAAUCAUCCCU	::: ::::: ::: ::::	ACUGAUUAUUUCCAAAUCUGU	Cleavage	Nucleic acid binding protein (AHRD V1 ***- D7LGX9_ARALY); contains Interpro domain(s) IPR014560 Uncharacterised conserved protein UCP030333, DNA/RNA-binding Alba-related	1
hvu-miR397a	SlAlba4	5	-1	1	21	553	573	CCGUUGAGUGCAGCGUUGAUG	::: :. :::::.:::.: :	AAUCUAUACUGCAUUCAGCUG	Cleavage	Nucleic acid binding protein (AHRD V1 ***- D7LGX9_ARALY); contains Interpro domain(s) IPR014560 Uncharacterised conserved protein UCP030333, DNA/RNA-binding Alba-related	1
hvu-miR6201	SlAlba4	4.5	-1	1	22	149	170	UGACCCUGAGGCACUCAUACCG	:::::::.::::: : ::	CAAGAUGAGUGUCUCAGAGACA	Cleavage	Nucleic acid binding protein (AHRD V1 ***- D7LGX9_ARALY); contains Interpro domain(s) IPR014560 Uncharacterised conserved protein UCP030333, DNA/RNA-binding Alba-related	1
mdm-miR7127a	SlAlba4	4.5	-1	1	21	438	458	AUACUCAUCGAAUUUGUCAUA	::: ::.::.:::::::	ACUGAGAAGUUUGAUGAGUUA	Cleavage	Nucleic acid binding protein (AHRD V1 ***- D7LGX9_ARALY); contains Interpro domain(s) IPR014560 Uncharacterised conserved protein UCP030333, DNA/RNA-binding Alba-related	1
mdm-miR7127b	SlAlba4	4.5	-1	1	21	438	458	AUACUCAUCGAAUUUGUCAUA	::: ::.::.:::::::	ACUGAGAAGUUUGAUGAGUUA	Cleavage	Nucleic acid binding protein (AHRD V1 ***- D7LGX9_ARALY); contains Interpro domain(s) IPR014560 Uncharacterised conserved protein UCP030333, DNA/RNA-binding Alba-related	1
mtr-miR2609a	SlAlba4	4.5	-1	1	21	498	518	UGGAAGUAAUAGGUUCUCACU	:::::. ::::.:::::	CAGCAGAACUGAUUAUUUCCA	Translation	Nucleic acid binding protein (AHRD V1 ***- D7LGX9_ARALY); contains Interpro domain(s) IPR014560 Uncharacterised conserved protein UCP030333, DNA/RNA-binding Alba-related	1
mtr-miR2609b	SlAlba4	4.5	-1	1	21	498	518	UGGAAGUAAUAGGUUCUCACU	:::::. ::::.:::::	CAGCAGAACUGAUUAUUUCCA	Translation	Nucleic acid binding protein (AHRD V1 ***- D7LGX9_ARALY); contains Interpro domain(s) IPR014560 Uncharacterised conserved protein UCP030333, DNA/RNA-binding Alba-related	1
mtr-miR5222	SlAlba4	5	-1	1	22	670	691	UUACAGGAGAAGAAUGUAUGGC	.::.: ::.::.:..: :::	UGUAUGCCUUUUUUUUUUUUAA	Cleavage	Nucleic acid binding protein (AHRD V1 ***- D7LGX9_ARALY); contains Interpro domain(s) IPR014560 Uncharacterised conserved protein UCP030333, DNA/RNA-binding Alba-related	1
mtr-miR5237	SlAlba4	4.5	-1	1	21	589	609	UUCAAAAGAUUUAGUUGGGAU	...::.: .::::::::.:	CCUUUAAUUUGAUCUUUUGGA	Cleavage	Nucleic acid binding protein (AHRD V1 ***- D7LGX9_ARALY); contains Interpro domain(s) IPR014560 Uncharacterised conserved protein UCP030333, DNA/RNA-binding Alba-related	1
mtr-miR5238	SlAlba4	5	-1	1	21	673	693	UGUAGAAAAAACAAAGGGCAA	::::.::: ::::::. ::	AUGCCUUUUUUUUUUUUAACC	Cleavage	Nucleic acid binding protein (AHRD V1 ***- D7LGX9_ARALY); contains Interpro domain(s) IPR014560 Uncharacterised conserved protein UCP030333, DNA/RNA-binding Alba-related	1
mtr-miR5248	SlAlba4	5	-1	1	21	764	784	UUUUUAGUUGGCAUGCAUUCA	:::: :: .:..::::::	UUUAUGCCUGGUAGUUAAAAA	Translation	Nucleic acid binding protein (AHRD V1 ***- D7LGX9_ARALY); contains Interpro domain(s) IPR014560 Uncharacterised conserved protein UCP030333, DNA/RNA-binding Alba-related	1
mtr-miR5290	SlAlba4	4.5	-1	1	24	28	51	AAUUUGGAGAGAGAUAGACACAUA	:: :: .:.:: :::::::	UUUUAGUAUAAUUUUCCCCAAAUU	Cleavage	Nucleic acid binding protein (AHRD V1 ***- D7LGX9_ARALY); contains Interpro domain(s) IPR014560 Uncharacterised conserved protein UCP030333, DNA/RNA-binding Alba-related	1
nta-miR6145d	SlAlba4	5	-1	1	21	235	255	AUUGUUACAUGUAACACUGGC	:: : :::::: ::::.:	CAAAGAGGUACAUGCAACAGU	Cleavage	Nucleic acid binding protein (AHRD V1 ***- D7LGX9_ARALY); contains Interpro domain(s) IPR014560 Uncharacterised conserved protein UCP030333, DNA/RNA-binding Alba-related	1
nta-miR6145e	SlAlba4	5	-1	1	21	235	255	AUUGUUACAUGUAGCACUGGC	:: : :::::: ::::.:	CAAAGAGGUACAUGCAACAGU	Cleavage	Nucleic acid binding protein (AHRD V1 ***- D7LGX9_ARALY); contains Interpro domain(s) IPR014560 Uncharacterised conserved protein UCP030333, DNA/RNA-binding Alba-related	1
osa-miR5486	SlAlba4	5	-1	1	21	660	680	AGGGGCUUGCAUAUUCUACCA	: :: :.::.::.: :::..:	UUGUUGGAUGUGUAUGCCUUU	Cleavage	Nucleic acid binding protein (AHRD V1 ***- D7LGX9_ARALY); contains Interpro domain(s) IPR014560 Uncharacterised conserved protein UCP030333, DNA/RNA-binding Alba-related	1
osa-miR5492	SlAlba4	3.5	-1	1	21	514	534	AGAAGGAGAAUAGAUAUGGUU	::: ::::.:::::.: ::	UUCCAAAUCUGUUCUCUUCCU	Cleavage	Nucleic acid binding protein (AHRD V1 ***- D7LGX9_ARALY); contains Interpro domain(s) IPR014560 Uncharacterised conserved protein UCP030333, DNA/RNA-binding Alba-related	1
ptc-miR169u-3p	SlAlba4	4.5	-1	1	21	68	88	GGCAGUCUCCUUUGGCUAUCC	: :: :::::::.::::	CAAAAGGGAAAGGAGGCUGCG	Cleavage	Nucleic acid binding protein (AHRD V1 ***- D7LGX9_ARALY); contains Interpro domain(s) IPR014560 Uncharacterised conserved protein UCP030333, DNA/RNA-binding Alba-related	1
ptc-miR171l-5p	SlAlba4	4.5	-1	1	22	388	409	UGUGAUAUUGGUCCGGCUCAUC	: ::::: ::::.::: :: :	CAGGAGCCCGACCGAUACCAAA	Cleavage	Nucleic acid binding protein (AHRD V1 ***- D7LGX9_ARALY); contains Interpro domain(s) IPR014560 Uncharacterised conserved protein UCP030333, DNA/RNA-binding Alba-related	1
ptc-miR475a-5p	SlAlba4	3.5	-1	1	21	273	293	AAUGGCCAUUGUAAGAGUAGA	:::.:::::. .:::::.:::	UCUGCUCUUGGGAUGGCUAUU	Translation	Nucleic acid binding protein (AHRD V1 ***- D7LGX9_ARALY); contains Interpro domain(s) IPR014560 Uncharacterised conserved protein UCP030333, DNA/RNA-binding Alba-related	1
ptc-miR475b-5p	SlAlba4	3.5	-1	1	21	273	293	AAUGGCCAUUGUAAGAGUAGA	:::.:::::. .:::::.:::	UCUGCUCUUGGGAUGGCUAUU	Translation	Nucleic acid binding protein (AHRD V1 ***- D7LGX9_ARALY); contains Interpro domain(s) IPR014560 Uncharacterised conserved protein UCP030333, DNA/RNA-binding Alba-related	1
ptc-miR480	SlAlba4	5	-1	1	24	738	761	ACUACUACAUCAUUGACGUUGAAC	:::: .:: :.::::::.::: :	CUUCACUGUAAGUGAUGUGGUAAU	Cleavage	Nucleic acid binding protein (AHRD V1 ***- D7LGX9_ARALY); contains Interpro domain(s) IPR014560 Uncharacterised conserved protein UCP030333, DNA/RNA-binding Alba-related	1
ptc-miR6456	SlAlba4	5	-1	1	21	117	136	UUGAGUCCUUCCAUUAGAUCC	::: .::::::::: :::	AAAUC-GAUGGAAGGAAUCAC	Cleavage	Nucleic acid binding protein (AHRD V1 ***- D7LGX9_ARALY); contains Interpro domain(s) IPR014560 Uncharacterised conserved protein UCP030333, DNA/RNA-binding Alba-related	1
ptc-miR6457b	SlAlba4	4	-1	1	21	75	95	UUAGUUUGGCAGCCUCUUCUC	:: :.:::::::: :::.::.	GAAAGGAGGCUGCGAAAUUAG	Cleavage	Nucleic acid binding protein (AHRD V1 ***- D7LGX9_ARALY); contains Interpro domain(s) IPR014560 Uncharacterised conserved protein UCP030333, DNA/RNA-binding Alba-related	1
rgl-miR7972	SlAlba4	5	-1	1	21	434	454	UUGUCAGGCUUGUUAUUCUCC	::: :.: :::..:::..:	CAAGACUGAGAAGUUUGAUGA	Cleavage	Nucleic acid binding protein (AHRD V1 ***- D7LGX9_ARALY); contains Interpro domain(s) IPR014560 Uncharacterised conserved protein UCP030333, DNA/RNA-binding Alba-related	1
smo-miR1103-3p	SlAlba4	5	-1	1	24	667	690	UGGAAAAAGGAGGUGCAUUCUUGU	:.. : :::: ..:..:::::..:	AUGUGUAUGCCUUUUUUUUUUUUA	Cleavage	Nucleic acid binding protein (AHRD V1 ***- D7LGX9_ARALY); contains Interpro domain(s) IPR014560 Uncharacterised conserved protein UCP030333, DNA/RNA-binding Alba-related	1
stu-miR8029	SlAlba4	5	-1	1	24	618	641	AGCCAUUUUUCUUUGUUUUGGAGC	.:. :::: :::: :. ::::.:	UUUUAAAAAAAAAGCAGCAUGGUU	Translation	Nucleic acid binding protein (AHRD V1 ***- D7LGX9_ARALY); contains Interpro domain(s) IPR014560 Uncharacterised conserved protein UCP030333, DNA/RNA-binding Alba-related	1
tae-miR6201	SlAlba4	4.5	-1	1	22	149	170	UGACCCUGAGGCACUCAUACCG	:::::::.::::: : ::	CAAGAUGAGUGUCUCAGAGACA	Cleavage	Nucleic acid binding protein (AHRD V1 ***- D7LGX9_ARALY); contains Interpro domain(s) IPR014560 Uncharacterised conserved protein UCP030333, DNA/RNA-binding Alba-related	1
vvi-miR479	SlAlba4	3.5	-1	1	22	388	409	UGUGGUAUUGGUUCGGCUCAUC	: ::::: .:::.:::::: :	CAGGAGCCCGACCGAUACCAAA	Cleavage	Nucleic acid binding protein (AHRD V1 ***- D7LGX9_ARALY); contains Interpro domain(s) IPR014560 Uncharacterised conserved protein UCP030333, DNA/RNA-binding Alba-related	1
zma-miR171h-5p	SlAlba4	5	-1	1	21	387	407	UGGUAUUGUUUCGGCUCAUGU	:: ::::: .: :.::::::	CCAGGAGCCCGACCGAUACCA	Cleavage	Nucleic acid binding protein (AHRD V1 ***- D7LGX9_ARALY); contains Interpro domain(s) IPR014560 Uncharacterised conserved protein UCP030333, DNA/RNA-binding Alba-related	1
zma-miR171k-5p	SlAlba4	5	-1	1	21	387	407	UGGUAUUGUUUCGGCUCAUGU	:: ::::: .: :.::::::	CCAGGAGCCCGACCGAUACCA	Cleavage	Nucleic acid binding protein (AHRD V1 ***- D7LGX9_ARALY); contains Interpro domain(s) IPR014560 Uncharacterised conserved protein UCP030333, DNA/RNA-binding Alba-related	1
ahy-miR156a	SlAlba5	5	-1	1	20	659	678	UGACAGAAGAGAGAGAGCAC	: ::: :::::::.:: :	CUUCUCCCUCUCUUUUGCCU	Cleavage	Nucleic acid binding protein (AHRD V1 ***- D7LGX9_ARALY); contains Interpro domain(s) IPR014560 Uncharacterised conserved protein UCP030333, DNA/RNA-binding Alba-related	1
aly-miR156a-5p	SlAlba5	5	-1	1	20	659	678	UGACAGAAGAGAGUGAGCAC	: ::: :::::::.:: :	CUUCUCCCUCUCUUUUGCCU	Cleavage	Nucleic acid binding protein (AHRD V1 ***- D7LGX9_ARALY); contains Interpro domain(s) IPR014560 Uncharacterised conserved protein UCP030333, DNA/RNA-binding Alba-related	1
aly-miR3446-3p	SlAlba5	5	-1	1	24	132	155	UGCCACUCUUUUAGCUUCCGAAUC	: .::.::::::::: : :	UUGCAGAGAGUUAAAAGAGUUGAA	Cleavage	Nucleic acid binding protein (AHRD V1 ***- D7LGX9_ARALY); contains Interpro domain(s) IPR014560 Uncharacterised conserved protein UCP030333, DNA/RNA-binding Alba-related	1
aqc-miR529	SlAlba5	4	-1	1	21	654	674	AGAAGAGAGAGAGCACAACCC	::: : ::: :::::::.:	AAGUUCUUCUCCCUCUCUUUU	Translation	Nucleic acid binding protein (AHRD V1 ***- D7LGX9_ARALY); contains Interpro domain(s) IPR014560 Uncharacterised conserved protein UCP030333, DNA/RNA-binding Alba-related	1
ata-miR156a-5p	SlAlba5	5	-1	1	20	659	678	UGACAGAAGAGAGUGAGCAC	: ::: :::::::.:: :	CUUCUCCCUCUCUUUUGCCU	Cleavage	Nucleic acid binding protein (AHRD V1 ***- D7LGX9_ARALY); contains Interpro domain(s) IPR014560 Uncharacterised conserved protein UCP030333, DNA/RNA-binding Alba-related	1
ata-miR156b-5p	SlAlba5	5	-1	1	20	659	678	UGACAGAAGAGAGUGAGCAC	: ::: :::::::.:: :	CUUCUCCCUCUCUUUUGCCU	Cleavage	Nucleic acid binding protein (AHRD V1 ***- D7LGX9_ARALY); contains Interpro domain(s) IPR014560 Uncharacterised conserved protein UCP030333, DNA/RNA-binding Alba-related	1
ata-miR156d-3p	SlAlba5	4.5	-1	1	22	163	184	GCUCACUCCUCUUUCUGUCAGC	: .:: :. ::::::::::	AGAGUUAGCAGAAGGAGUGAGC	Translation	Nucleic acid binding protein (AHRD V1 ***- D7LGX9_ARALY); contains Interpro domain(s) IPR014560 Uncharacterised conserved protein UCP030333, DNA/RNA-binding Alba-related	1
ata-miR156d-5p	SlAlba5	5	-1	1	20	659	678	UGACAGAAGAGAGUGAGCAC	: ::: :::::::.:: :	CUUCUCCCUCUCUUUUGCCU	Cleavage	Nucleic acid binding protein (AHRD V1 ***- D7LGX9_ARALY); contains Interpro domain(s) IPR014560 Uncharacterised conserved protein UCP030333, DNA/RNA-binding Alba-related	1
ata-miR156e-5p	SlAlba5	5	-1	1	20	659	678	UGACAGAAGAGAGUGAGCAC	: ::: :::::::.:: :	CUUCUCCCUCUCUUUUGCCU	Cleavage	Nucleic acid binding protein (AHRD V1 ***- D7LGX9_ARALY); contains Interpro domain(s) IPR014560 Uncharacterised conserved protein UCP030333, DNA/RNA-binding Alba-related	1
ath-miR5017-5p	SlAlba5	5	-1	1	21	578	598	AUUUGUUACUAAUUUGGAAUG	:.:: .:: :::: :.:::::	CGUUGUAAUUUAGAAGCAAAU	Cleavage	Nucleic acid binding protein (AHRD V1 ***- D7LGX9_ARALY); contains Interpro domain(s) IPR014560 Uncharacterised conserved protein UCP030333, DNA/RNA-binding Alba-related	1
ath-miR5657	SlAlba5	5	-1	1	21	715	735	UGGACAAGGUUAGAUUUGGUG	::..:::.: :: :::::.:	AACUGAAUUUUACAUUGUCUA	Translation	Nucleic acid binding protein (AHRD V1 ***- D7LGX9_ARALY); contains Interpro domain(s) IPR014560 Uncharacterised conserved protein UCP030333, DNA/RNA-binding Alba-related	1
ath-miR844-5p	SlAlba5	4.5	-1	1	21	584	604	UGGUAAGAUUGCUUAUAAGCU	: .::: :::::: .:::::	AAUUUAGAAGCAAAUUUACCU	Cleavage	Nucleic acid binding protein (AHRD V1 ***- D7LGX9_ARALY); contains Interpro domain(s) IPR014560 Uncharacterised conserved protein UCP030333, DNA/RNA-binding Alba-related	1
ath-miR869.1	SlAlba5	5	-1	1	21	527	547	AUUGGUUCAAUUCUGGUGUUG	::. : ::::.:::::. :::	CAGGAACAGAGUUGAAUAAAU	Cleavage	Nucleic acid binding protein (AHRD V1 ***- D7LGX9_ARALY); contains Interpro domain(s) IPR014560 Uncharacterised conserved protein UCP030333, DNA/RNA-binding Alba-related	1
bdi-miR156a	SlAlba5	5	-1	1	21	658	678	UGACAGAAGAGAGAGAGCACA	: : ::: :::::::.:: :	UCUUCUCCCUCUCUUUUGCCU	Cleavage	Nucleic acid binding protein (AHRD V1 ***- D7LGX9_ARALY); contains Interpro domain(s) IPR014560 Uncharacterised conserved protein UCP030333, DNA/RNA-binding Alba-related	1
bdi-miR156b-5p	SlAlba5	5	-1	1	20	659	678	UGACAGAAGAGAGUGAGCAC	: ::: :::::::.:: :	CUUCUCCCUCUCUUUUGCCU	Cleavage	Nucleic acid binding protein (AHRD V1 ***- D7LGX9_ARALY); contains Interpro domain(s) IPR014560 Uncharacterised conserved protein UCP030333, DNA/RNA-binding Alba-related	1
bdi-miR156c	SlAlba5	5	-1	1	20	659	678	UGACAGAAGAGAGUGAGCAC	: ::: :::::::.:: :	CUUCUCCCUCUCUUUUGCCU	Cleavage	Nucleic acid binding protein (AHRD V1 ***- D7LGX9_ARALY); contains Interpro domain(s) IPR014560 Uncharacterised conserved protein UCP030333, DNA/RNA-binding Alba-related	1
bdi-miR5176-3p	SlAlba5	5	-1	1	21	730	750	UGUGAUGAUGUGGCAUAGAAU	::::: .:. .::.:.:::	UGUCUAUUUCGAGUCGUUACA	Translation	Nucleic acid binding protein (AHRD V1 ***- D7LGX9_ARALY); contains Interpro domain(s) IPR014560 Uncharacterised conserved protein UCP030333, DNA/RNA-binding Alba-related	1
bdi-miR529-5p	SlAlba5	4.5	-1	1	21	654	674	AGAAGAGAGAGAGUACAGCCU	: :.: : ::: :::::::.:	AAGUUCUUCUCCCUCUCUUUU	Translation	Nucleic acid binding protein (AHRD V1 ***- D7LGX9_ARALY); contains Interpro domain(s) IPR014560 Uncharacterised conserved protein UCP030333, DNA/RNA-binding Alba-related	1
bdi-miR7717a-3p	SlAlba5	5	-1	1	24	323	346	GAUGGAUACGAUUGUCGACUGAGA	:: :::.:.::::: ::.	GCGAUUUCAACAGUUGUAUCAAUU	Cleavage	Nucleic acid binding protein (AHRD V1 ***- D7LGX9_ARALY); contains Interpro domain(s) IPR014560 Uncharacterised conserved protein UCP030333, DNA/RNA-binding Alba-related	1
bdi-miR7717c-3p	SlAlba5	4.5	-1	1	24	97	120	UUAGUUGACUGAGAAAUAGACGGU	:: :: ::: ::::::..:: ::	UCCCUCCAUUGCUCAGUUGACGAA	Cleavage	Nucleic acid binding protein (AHRD V1 ***- D7LGX9_ARALY); contains Interpro domain(s) IPR014560 Uncharacterised conserved protein UCP030333, DNA/RNA-binding Alba-related	1
bdi-miR7725b-5p.1	SlAlba5	5	-1	1	21	4	24	ACUAGGGAGAUGGUUUUCGCU	: :: :..:.:.::::::	UACAAAUUCUGUUUUCCUAGU	Cleavage	Nucleic acid binding protein (AHRD V1 ***- D7LGX9_ARALY); contains Interpro domain(s) IPR014560 Uncharacterised conserved protein UCP030333, DNA/RNA-binding Alba-related	1
bdi-miR7748b-3p	SlAlba5	4.5	-1	1	24	631	654	UUGGUCAAAGAAAAUCUAAUACGC	::.::::::::: :.::	UCUCUACAGGUUUUCUUUGUCUAA	Cleavage	Nucleic acid binding protein (AHRD V1 ***- D7LGX9_ARALY); contains Interpro domain(s) IPR014560 Uncharacterised conserved protein UCP030333, DNA/RNA-binding Alba-related	1
bdi-miR7767-5p	SlAlba5	3.5	-1	1	21	298	318	CCCCAAGCUGAGAGCUCUCCC	: .:::::.::::::: :::	AGUGGAGCUUUCAGCUUUGGG	Cleavage	Nucleic acid binding protein (AHRD V1 ***- D7LGX9_ARALY); contains Interpro domain(s) IPR014560 Uncharacterised conserved protein UCP030333, DNA/RNA-binding Alba-related	1
bna-miR156a	SlAlba5	5	-1	1	21	658	678	UGACAGAAGAGAGUGAGCACA	: : ::: :::::::.:: :	UCUUCUCCCUCUCUUUUGCCU	Cleavage	Nucleic acid binding protein (AHRD V1 ***- D7LGX9_ARALY); contains Interpro domain(s) IPR014560 Uncharacterised conserved protein UCP030333, DNA/RNA-binding Alba-related	1
bna-miR156d	SlAlba5	5	-1	1	20	659	678	UGACAGAAGAGAGUGAGCAC	: ::: :::::::.:: :	CUUCUCCCUCUCUUUUGCCU	Cleavage	Nucleic acid binding protein (AHRD V1 ***- D7LGX9_ARALY); contains Interpro domain(s) IPR014560 Uncharacterised conserved protein UCP030333, DNA/RNA-binding Alba-related	1
bna-miR156e	SlAlba5	5	-1	1	20	659	678	UGACAGAAGAGAGUGAGCAC	: ::: :::::::.:: :	CUUCUCCCUCUCUUUUGCCU	Cleavage	Nucleic acid binding protein (AHRD V1 ***- D7LGX9_ARALY); contains Interpro domain(s) IPR014560 Uncharacterised conserved protein UCP030333, DNA/RNA-binding Alba-related	1
bra-miR6032-3p	SlAlba5	5	-1	1	22	153	174	UCUGCUGGUCGUUCCAUGUUAA	::.:::::: ...::::::	GAAAUAUGGAAGAGUUAGCAGA	Translation	Nucleic acid binding protein (AHRD V1 ***- D7LGX9_ARALY); contains Interpro domain(s) IPR014560 Uncharacterised conserved protein UCP030333, DNA/RNA-binding Alba-related	1
cca-miR156a	SlAlba5	5	-1	1	20	659	678	UGACAGAAGAGAGUGAGCAC	: ::: :::::::.:: :	CUUCUCCCUCUCUUUUGCCU	Cleavage	Nucleic acid binding protein (AHRD V1 ***- D7LGX9_ARALY); contains Interpro domain(s) IPR014560 Uncharacterised conserved protein UCP030333, DNA/RNA-binding Alba-related	1
cca-miR156b	SlAlba5	5	-1	1	21	658	678	UGACAGAAGAGAGUGAGCAUA	: : ::: :::::::.:: :	UCUUCUCCCUCUCUUUUGCCU	Cleavage	Nucleic acid binding protein (AHRD V1 ***- D7LGX9_ARALY); contains Interpro domain(s) IPR014560 Uncharacterised conserved protein UCP030333, DNA/RNA-binding Alba-related	1
cpa-miR8136	SlAlba5	5	-1	1	19	1	19	UAAAGUGGAAUUGGGAUAA	:::: : :::::...:::	UUAUACAAAUUCUGUUUUC	Cleavage	Nucleic acid binding protein (AHRD V1 ***- D7LGX9_ARALY); contains Interpro domain(s) IPR014560 Uncharacterised conserved protein UCP030333, DNA/RNA-binding Alba-related	1
cre-miR1167	SlAlba5	4.5	-1	1	20	735	754	GGGGUGUGAUGAUUUGAAAC	::::.:.::.:.:::::	AUUUCGAGUCGUUACACCAG	Cleavage	Nucleic acid binding protein (AHRD V1 ***- D7LGX9_ARALY); contains Interpro domain(s) IPR014560 Uncharacterised conserved protein UCP030333, DNA/RNA-binding Alba-related	1
csi-miR156	SlAlba5	5	-1	1	20	659	678	UGACAGAAGAGAGUGAGCAC	: ::: :::::::.:: :	CUUCUCCCUCUCUUUUGCCU	Cleavage	Nucleic acid binding protein (AHRD V1 ***- D7LGX9_ARALY); contains Interpro domain(s) IPR014560 Uncharacterised conserved protein UCP030333, DNA/RNA-binding Alba-related	1
csi-miR3946	SlAlba5	4.5	-1	1	24	616	639	UUGUAGAGAAAGAGAAGAGAGCAC	:: .::.:. :::::::::.	AUUAUCCUUUUUUGUUCUCUACAG	Translation	Nucleic acid binding protein (AHRD V1 ***- D7LGX9_ARALY); contains Interpro domain(s) IPR014560 Uncharacterised conserved protein UCP030333, DNA/RNA-binding Alba-related	1
ctr-miR156	SlAlba5	5	-1	1	20	659	678	UGACAGAAGAGAGUGAGCAC	: ::: :::::::.:: :	CUUCUCCCUCUCUUUUGCCU	Cleavage	Nucleic acid binding protein (AHRD V1 ***- D7LGX9_ARALY); contains Interpro domain(s) IPR014560 Uncharacterised conserved protein UCP030333, DNA/RNA-binding Alba-related	1
dpr-miR156a	SlAlba5	4	-1	1	20	659	678	UGACAGAAGAGAGGGAGCAC	: :::::::::::.:: :	CUUCUCCCUCUCUUUUGCCU	Cleavage	Nucleic acid binding protein (AHRD V1 ***- D7LGX9_ARALY); contains Interpro domain(s) IPR014560 Uncharacterised conserved protein UCP030333, DNA/RNA-binding Alba-related	1
dpr-miR156b	SlAlba5	5	-1	1	20	659	678	UGACAGAAGAGAGUGAGCAC	: ::: :::::::.:: :	CUUCUCCCUCUCUUUUGCCU	Cleavage	Nucleic acid binding protein (AHRD V1 ***- D7LGX9_ARALY); contains Interpro domain(s) IPR014560 Uncharacterised conserved protein UCP030333, DNA/RNA-binding Alba-related	1
esi-miR3455-3p	SlAlba5	4.5	-1	1	21	558	578	CGGUGGAAUCUGAGGAUAGUG	.: :.:.:::::::::...:	UAAUGUUCUCAGAUUCUGUCC	Cleavage	Nucleic acid binding protein (AHRD V1 ***- D7LGX9_ARALY); contains Interpro domain(s) IPR014560 Uncharacterised conserved protein UCP030333, DNA/RNA-binding Alba-related	1
far-miR1119	SlAlba5	5	-1	1	24	57	80	UGGCACGGCGUGAUGCUUAGUCAG	..::: .::: :::::: .::	ACAGUUAAUUAUCCCGCCGUUUCA	Translation	Nucleic acid binding protein (AHRD V1 ***- D7LGX9_ARALY); contains Interpro domain(s) IPR014560 Uncharacterised conserved protein UCP030333, DNA/RNA-binding Alba-related	1
far-miR156a	SlAlba5	5	-1	1	21	658	678	UGACAGAAGAGAGAGAGCACA	: : ::: :::::::.:: :	UCUUCUCCCUCUCUUUUGCCU	Cleavage	Nucleic acid binding protein (AHRD V1 ***- D7LGX9_ARALY); contains Interpro domain(s) IPR014560 Uncharacterised conserved protein UCP030333, DNA/RNA-binding Alba-related	1
far-miR529	SlAlba5	4.5	-1	1	21	654	674	AGAAGAGAGAGAGCACAGCUU	:::.: : ::: :::::::.:	AAGUUCUUCUCCCUCUCUUUU	Translation	Nucleic acid binding protein (AHRD V1 ***- D7LGX9_ARALY); contains Interpro domain(s) IPR014560 Uncharacterised conserved protein UCP030333, DNA/RNA-binding Alba-related	1
ghr-miR156a	SlAlba5	5	-1	1	20	659	678	UGACAGAAGAGAGUGAGCAC	: ::: :::::::.:: :	CUUCUCCCUCUCUUUUGCCU	Cleavage	Nucleic acid binding protein (AHRD V1 ***- D7LGX9_ARALY); contains Interpro domain(s) IPR014560 Uncharacterised conserved protein UCP030333, DNA/RNA-binding Alba-related	1
ghr-miR156b	SlAlba5	5	-1	1	20	659	678	UGACAGAAGAGAGUGAGCAC	: ::: :::::::.:: :	CUUCUCCCUCUCUUUUGCCU	Cleavage	Nucleic acid binding protein (AHRD V1 ***- D7LGX9_ARALY); contains Interpro domain(s) IPR014560 Uncharacterised conserved protein UCP030333, DNA/RNA-binding Alba-related	1
gma-miR1510a-3p	SlAlba5	5	-1	1	23	457	479	UUGUUGUUUUACCUAUUCCACCC	: : :.:::::.::....:	AAUCGUACUGGGUAAGACGGUGA	Cleavage	Nucleic acid binding protein (AHRD V1 ***- D7LGX9_ARALY); contains Interpro domain(s) IPR014560 Uncharacterised conserved protein UCP030333, DNA/RNA-binding Alba-related	1
gma-miR156a	SlAlba5	5	-1	1	20	659	678	UGACAGAAGAGAGUGAGCAC	: ::: :::::::.:: :	CUUCUCCCUCUCUUUUGCCU	Cleavage	Nucleic acid binding protein (AHRD V1 ***- D7LGX9_ARALY); contains Interpro domain(s) IPR014560 Uncharacterised conserved protein UCP030333, DNA/RNA-binding Alba-related	1
gma-miR156b	SlAlba5	5	-1	1	21	658	678	UGACAGAAGAGAGAGAGCACA	: : ::: :::::::.:: :	UCUUCUCCCUCUCUUUUGCCU	Cleavage	Nucleic acid binding protein (AHRD V1 ***- D7LGX9_ARALY); contains Interpro domain(s) IPR014560 Uncharacterised conserved protein UCP030333, DNA/RNA-binding Alba-related	1
gma-miR5035-3p	SlAlba5	5	-1	1	24	696	718	UGUUUAGAAGCUCAUAGAAUAGAU	::: ::.: ::.:. :::::::	CUCU-UUUUUUGGGUGUCUAAACU	Cleavage	Nucleic acid binding protein (AHRD V1 ***- D7LGX9_ARALY); contains Interpro domain(s) IPR014560 Uncharacterised conserved protein UCP030333, DNA/RNA-binding Alba-related	1
gra-miR8657a	SlAlba5	4.5	-1	1	24	389	412	UGUAGUAAUUGUAGAAGUUCAGGG	.::::::::..::. :..:	AUCAUGACUUCUACGGUUGAUGUA	Cleavage	Nucleic acid binding protein (AHRD V1 ***- D7LGX9_ARALY); contains Interpro domain(s) IPR014560 Uncharacterised conserved protein UCP030333, DNA/RNA-binding Alba-related	1
gra-miR8657b	SlAlba5	4.5	-1	1	24	389	412	UGUAGUAAUUGUAGAAGUUCAGGG	.::::::::..::. :..:	AUCAUGACUUCUACGGUUGAUGUA	Cleavage	Nucleic acid binding protein (AHRD V1 ***- D7LGX9_ARALY); contains Interpro domain(s) IPR014560 Uncharacterised conserved protein UCP030333, DNA/RNA-binding Alba-related	1
gra-miR8691	SlAlba5	5	-1	1	24	612	635	AGAUGAUGAGAAAGGAAAGUCAAG	:: :.: ::::::.:..:. :::	CUAUAUUAUCCUUUUUUGUUCUCU	Cleavage	Nucleic acid binding protein (AHRD V1 ***- D7LGX9_ARALY); contains Interpro domain(s) IPR014560 Uncharacterised conserved protein UCP030333, DNA/RNA-binding Alba-related	1
gra-miR8698	SlAlba5	4.5	-1	1	24	49	72	AGGGACAAUUAACUUUAACGGUCA	:: : :::::::: ::::	CAAAAGUAACAGUUAAUUAUCCCG	Cleavage	Nucleic acid binding protein (AHRD V1 ***- D7LGX9_ARALY); contains Interpro domain(s) IPR014560 Uncharacterised conserved protein UCP030333, DNA/RNA-binding Alba-related	1
gra-miR8746	SlAlba5	5	-1	1	21	143	162	UCCAUAUUUCACUAUCUCUUA	::: ::: . :::::::::::	UAAAAGA-GUUGAAAUAUGGA	Cleavage	Nucleic acid binding protein (AHRD V1 ***- D7LGX9_ARALY); contains Interpro domain(s) IPR014560 Uncharacterised conserved protein UCP030333, DNA/RNA-binding Alba-related	1
gra-miR8751a	SlAlba5	4.5	-1	1	24	621	645	UGAAAUUUGUAGAG-ACAAAACGCU	:::::: :::::::..:::.	CCUUUUUUGUUCUCUACAGGUUUUC	Cleavage	Nucleic acid binding protein (AHRD V1 ***- D7LGX9_ARALY); contains Interpro domain(s) IPR014560 Uncharacterised conserved protein UCP030333, DNA/RNA-binding Alba-related	1
gra-miR8751b	SlAlba5	5	-1	1	24	622	645	UGAAAUUUGUAGAGAGAUAACGCU	:: .::::::::..:::.	CUUUUUUGUUCUCUACAGGUUUUC	Cleavage	Nucleic acid binding protein (AHRD V1 ***- D7LGX9_ARALY); contains Interpro domain(s) IPR014560 Uncharacterised conserved protein UCP030333, DNA/RNA-binding Alba-related	1
han-miR156a	SlAlba5	5	-1	1	20	659	678	UGACAGAAGAGAGUGAGCAC	: ::: :::::::.:: :	CUUCUCCCUCUCUUUUGCCU	Cleavage	Nucleic acid binding protein (AHRD V1 ***- D7LGX9_ARALY); contains Interpro domain(s) IPR014560 Uncharacterised conserved protein UCP030333, DNA/RNA-binding Alba-related	1
han-miR156b	SlAlba5	5	-1	1	20	659	678	UGACAGAAGAGAGUGAGCAC	: ::: :::::::.:: :	CUUCUCCCUCUCUUUUGCCU	Cleavage	Nucleic acid binding protein (AHRD V1 ***- D7LGX9_ARALY); contains Interpro domain(s) IPR014560 Uncharacterised conserved protein UCP030333, DNA/RNA-binding Alba-related	1
hvu-miR6192	SlAlba5	4.5	-1	1	22	654	675	UAGGAGAGGGGGGAAGGGAUCU	: .:.:.: .:::.::::..:.	AAGUUCUUCUCCCUCUCUUUUG	Cleavage	Nucleic acid binding protein (AHRD V1 ***- D7LGX9_ARALY); contains Interpro domain(s) IPR014560 Uncharacterised conserved protein UCP030333, DNA/RNA-binding Alba-related	1
hvu-miR6205	SlAlba5	5	-1	1	23	211	233	AGGAUGUUUGGAUACGUUUUAGU	.:: :: ::.:::..:::.	GAAGAAUCGGAUUCAAGUAUCUA	Cleavage	Nucleic acid binding protein (AHRD V1 ***- D7LGX9_ARALY); contains Interpro domain(s) IPR014560 Uncharacterised conserved protein UCP030333, DNA/RNA-binding Alba-related	1
lja-miR7533a	SlAlba5	5	-1	1	21	653	673	GAGGGGAUGGAGAGAAGCUGG	::.: .::::: ::.:.:.	AAAGUUCUUCUCCCUCUCUUU	Cleavage	Nucleic acid binding protein (AHRD V1 ***- D7LGX9_ARALY); contains Interpro domain(s) IPR014560 Uncharacterised conserved protein UCP030333, DNA/RNA-binding Alba-related	1
lja-miR7533b	SlAlba5	5	-1	1	21	653	673	GAGGGGAUGGAGAGAAGCUGG	::.: .::::: ::.:.:.	AAAGUUCUUCUCCCUCUCUUU	Cleavage	Nucleic acid binding protein (AHRD V1 ***- D7LGX9_ARALY); contains Interpro domain(s) IPR014560 Uncharacterised conserved protein UCP030333, DNA/RNA-binding Alba-related	1
mdm-miR156a	SlAlba5	5	-1	1	20	659	678	UGACAGAAGAGAGUGAGCAC	: ::: :::::::.:: :	CUUCUCCCUCUCUUUUGCCU	Cleavage	Nucleic acid binding protein (AHRD V1 ***- D7LGX9_ARALY); contains Interpro domain(s) IPR014560 Uncharacterised conserved protein UCP030333, DNA/RNA-binding Alba-related	1
mdm-miR156b	SlAlba5	5	-1	1	20	659	678	UGACAGAAGAGAGUGAGCAC	: ::: :::::::.:: :	CUUCUCCCUCUCUUUUGCCU	Cleavage	Nucleic acid binding protein (AHRD V1 ***- D7LGX9_ARALY); contains Interpro domain(s) IPR014560 Uncharacterised conserved protein UCP030333, DNA/RNA-binding Alba-related	1
mdm-miR5225a	SlAlba5	5	-1	1	22	70	91	UCUGUCGAAGGUGAGAUGGUGC	:.::.:.:::..::: .:.:.	CCGCCGUUUCAUUUUCAGCGGG	Cleavage	Nucleic acid binding protein (AHRD V1 ***- D7LGX9_ARALY); contains Interpro domain(s) IPR014560 Uncharacterised conserved protein UCP030333, DNA/RNA-binding Alba-related	1
mdm-miR5225b	SlAlba5	5	-1	1	22	70	91	UCUGUCGAAGGUGAGAUGGUGC	:.::.:.:::..::: .:.:.	CCGCCGUUUCAUUUUCAGCGGG	Cleavage	Nucleic acid binding protein (AHRD V1 ***- D7LGX9_ARALY); contains Interpro domain(s) IPR014560 Uncharacterised conserved protein UCP030333, DNA/RNA-binding Alba-related	1
mes-miR156a	SlAlba5	5	-1	1	20	659	678	UGACAGAAGAGAGUGAGCAC	: ::: :::::::.:: :	CUUCUCCCUCUCUUUUGCCU	Cleavage	Nucleic acid binding protein (AHRD V1 ***- D7LGX9_ARALY); contains Interpro domain(s) IPR014560 Uncharacterised conserved protein UCP030333, DNA/RNA-binding Alba-related	1
mes-miR156b	SlAlba5	5	-1	1	20	659	678	UGACAGAAGAGAGUGAGCAC	: ::: :::::::.:: :	CUUCUCCCUCUCUUUUGCCU	Cleavage	Nucleic acid binding protein (AHRD V1 ***- D7LGX9_ARALY); contains Interpro domain(s) IPR014560 Uncharacterised conserved protein UCP030333, DNA/RNA-binding Alba-related	1
mtr-miR1507-5p	SlAlba5	5	-1	1	22	622	643	AGAGUUGUAUGGAACGAAAGAU	:.:::.::::. ::::. :.:	CUUUUUUGUUCUCUACAGGUUU	Translation	Nucleic acid binding protein (AHRD V1 ***- D7LGX9_ARALY); contains Interpro domain(s) IPR014560 Uncharacterised conserved protein UCP030333, DNA/RNA-binding Alba-related	1
mtr-miR156a	SlAlba5	5	-1	1	21	658	678	UGACAGAAGAGAGAGAGCACA	: : ::: :::::::.:: :	UCUUCUCCCUCUCUUUUGCCU	Cleavage	Nucleic acid binding protein (AHRD V1 ***- D7LGX9_ARALY); contains Interpro domain(s) IPR014560 Uncharacterised conserved protein UCP030333, DNA/RNA-binding Alba-related	1
mtr-miR156b-5p	SlAlba5	5	-1	1	20	659	678	UGACAGAAGAGAGUGAGCAC	: ::: :::::::.:: :	CUUCUCCCUCUCUUUUGCCU	Cleavage	Nucleic acid binding protein (AHRD V1 ***- D7LGX9_ARALY); contains Interpro domain(s) IPR014560 Uncharacterised conserved protein UCP030333, DNA/RNA-binding Alba-related	1
mtr-miR156i-3p	SlAlba5	5	-1	1	23	163	185	UGCUCACUUCUCUUUCUGUCAUC	: .:: :. ::.::::::::	AGAGUUAGCAGAAGGAGUGAGCA	Cleavage	Nucleic acid binding protein (AHRD V1 ***- D7LGX9_ARALY); contains Interpro domain(s) IPR014560 Uncharacterised conserved protein UCP030333, DNA/RNA-binding Alba-related	1
mtr-miR156i-5p	SlAlba5	5	-1	1	20	659	678	UGACAGAAGAGAGUGAGCAC	: ::: :::::::.:: :	CUUCUCCCUCUCUUUUGCCU	Cleavage	Nucleic acid binding protein (AHRD V1 ***- D7LGX9_ARALY); contains Interpro domain(s) IPR014560 Uncharacterised conserved protein UCP030333, DNA/RNA-binding Alba-related	1
mtr-miR2590h	SlAlba5	4.5	-1	1	24	61	84	AGAAUGACAUGGCAGAAUAAUCAC	: ::::: : :::.: :::::.:	UUAAUUAUCCCGCCGUUUCAUUUU	Cleavage	Nucleic acid binding protein (AHRD V1 ***- D7LGX9_ARALY); contains Interpro domain(s) IPR014560 Uncharacterised conserved protein UCP030333, DNA/RNA-binding Alba-related	1
mtr-miR2592a.2-3p	SlAlba5	5	-1	1	21	212	232	AAAUGCUUGAGUCCUGUUGUU	:: ::. :::.:::::.:: :	AAGAAUCGGAUUCAAGUAUCU	Cleavage	Nucleic acid binding protein (AHRD V1 ***- D7LGX9_ARALY); contains Interpro domain(s) IPR014560 Uncharacterised conserved protein UCP030333, DNA/RNA-binding Alba-related	1
mtr-miR2618a	SlAlba5	5	-1	1	22	705	726	GUGAAUUCAGUUUACGUACGUU	::.. :::::::::::.	UGGGUGUCUAAACUGAAUUUUA	Cleavage	Nucleic acid binding protein (AHRD V1 ***- D7LGX9_ARALY); contains Interpro domain(s) IPR014560 Uncharacterised conserved protein UCP030333, DNA/RNA-binding Alba-related	1
mtr-miR2618b	SlAlba5	5	-1	1	22	705	726	GUGAAUUCAGUUUACGUACGUU	::.. :::::::::::.	UGGGUGUCUAAACUGAAUUUUA	Cleavage	Nucleic acid binding protein (AHRD V1 ***- D7LGX9_ARALY); contains Interpro domain(s) IPR014560 Uncharacterised conserved protein UCP030333, DNA/RNA-binding Alba-related	1
mtr-miR5225a	SlAlba5	5	-1	1	22	387	408	UCAGUCGCAGGAGAGAUGACAC	:::: ::.:: ::..:::	AAAUCAUGACUUCUACGGUUGA	Cleavage	Nucleic acid binding protein (AHRD V1 ***- D7LGX9_ARALY); contains Interpro domain(s) IPR014560 Uncharacterised conserved protein UCP030333, DNA/RNA-binding Alba-related	1
mtr-miR5250	SlAlba5	5	-1	1	21	548	568	UGAGAAUGUUAGAUACGGAAC	: ..::: .:::..::::::	AUAUUGUAGUUAAUGUUCUCA	Cleavage	Nucleic acid binding protein (AHRD V1 ***- D7LGX9_ARALY); contains Interpro domain(s) IPR014560 Uncharacterised conserved protein UCP030333, DNA/RNA-binding Alba-related	1
mtr-miR5256	SlAlba5	4	-1	1	21	718	738	UAAUGGAUUAUGUAAGAUUAA	: :::.:::::: .::.:::	UGAAUUUUACAUUGUCUAUUU	Cleavage	Nucleic acid binding protein (AHRD V1 ***- D7LGX9_ARALY); contains Interpro domain(s) IPR014560 Uncharacterised conserved protein UCP030333, DNA/RNA-binding Alba-related	1
mtr-miR5272f	SlAlba5	5	-1	1	24	181	204	GAAUUGAUUAUGUUUGGAUACACU	::...::: :..:..::::	GAGCAAUUUGAACCUGGUUGAUUC	Translation	Nucleic acid binding protein (AHRD V1 ***- D7LGX9_ARALY); contains Interpro domain(s) IPR014560 Uncharacterised conserved protein UCP030333, DNA/RNA-binding Alba-related	1
mtr-miR7698-5p	SlAlba5	5	-1	1	21	472	492	UUUUCAUCAAAGUUUUCUGGA	:.: .:::::::::::.	GACGGUGAACUUUGAUGAGUU	Cleavage	Nucleic acid binding protein (AHRD V1 ***- D7LGX9_ARALY); contains Interpro domain(s) IPR014560 Uncharacterised conserved protein UCP030333, DNA/RNA-binding Alba-related	1
nta-miR156a	SlAlba5	5	-1	1	20	659	678	UGACAGAAGAGAGUGAGCAC	: ::: :::::::.:: :	CUUCUCCCUCUCUUUUGCCU	Cleavage	Nucleic acid binding protein (AHRD V1 ***- D7LGX9_ARALY); contains Interpro domain(s) IPR014560 Uncharacterised conserved protein UCP030333, DNA/RNA-binding Alba-related	1
osa-miR1440b	SlAlba5	4.5	-1	1	21	4	24	UUUAGGAGAGUGGUAUUUGAG	::::: :...:.:::::.	UACAAAUUCUGUUUUCCUAGU	Cleavage	Nucleic acid binding protein (AHRD V1 ***- D7LGX9_ARALY); contains Interpro domain(s) IPR014560 Uncharacterised conserved protein UCP030333, DNA/RNA-binding Alba-related	1
osa-miR156a	SlAlba5	5	-1	1	20	659	678	UGACAGAAGAGAGUGAGCAC	: ::: :::::::.:: :	CUUCUCCCUCUCUUUUGCCU	Cleavage	Nucleic acid binding protein (AHRD V1 ***- D7LGX9_ARALY); contains Interpro domain(s) IPR014560 Uncharacterised conserved protein UCP030333, DNA/RNA-binding Alba-related	1
osa-miR156f-3p	SlAlba5	5	-1	1	22	163	184	GCUCACUUCUCUUUCUGUCAGC	: .:: :. ::.:::::::	AGAGUUAGCAGAAGGAGUGAGC	Translation	Nucleic acid binding protein (AHRD V1 ***- D7LGX9_ARALY); contains Interpro domain(s) IPR014560 Uncharacterised conserved protein UCP030333, DNA/RNA-binding Alba-related	1
osa-miR156i	SlAlba5	5	-1	1	20	659	678	UGACAGAAGAGAGUGAGCAC	: ::: :::::::.:: :	CUUCUCCCUCUCUUUUGCCU	Cleavage	Nucleic acid binding protein (AHRD V1 ***- D7LGX9_ARALY); contains Interpro domain(s) IPR014560 Uncharacterised conserved protein UCP030333, DNA/RNA-binding Alba-related	1
osa-miR156j-3p	SlAlba5	5	-1	1	22	163	184	GCUCGCUCCUCUUUCUGUCAGC	: .:: :. :::::.::::	AGAGUUAGCAGAAGGAGUGAGC	Translation	Nucleic acid binding protein (AHRD V1 ***- D7LGX9_ARALY); contains Interpro domain(s) IPR014560 Uncharacterised conserved protein UCP030333, DNA/RNA-binding Alba-related	1
osa-miR156j-5p	SlAlba5	5	-1	1	20	659	678	UGACAGAAGAGAGUGAGCAC	: ::: :::::::.:: :	CUUCUCCCUCUCUUUUGCCU	Cleavage	Nucleic acid binding protein (AHRD V1 ***- D7LGX9_ARALY); contains Interpro domain(s) IPR014560 Uncharacterised conserved protein UCP030333, DNA/RNA-binding Alba-related	1
osa-miR156k	SlAlba5	5	-1	1	21	658	678	UGACAGAAGAGAGAGAGCACA	: : ::: :::::::.:: :	UCUUCUCCCUCUCUUUUGCCU	Cleavage	Nucleic acid binding protein (AHRD V1 ***- D7LGX9_ARALY); contains Interpro domain(s) IPR014560 Uncharacterised conserved protein UCP030333, DNA/RNA-binding Alba-related	1
osa-miR156l-3p	SlAlba5	5	-1	1	22	163	184	GCUCACUUCUCUUUCUGUCAGC	: .:: :. ::.:::::::	AGAGUUAGCAGAAGGAGUGAGC	Translation	Nucleic acid binding protein (AHRD V1 ***- D7LGX9_ARALY); contains Interpro domain(s) IPR014560 Uncharacterised conserved protein UCP030333, DNA/RNA-binding Alba-related	1
osa-miR156l-5p	SlAlba5	5	-1	1	21	658	678	CGACAGAAGAGAGUGAGCAUA	: : ::: :::::::.:: :	UCUUCUCCCUCUCUUUUGCCU	Cleavage	Nucleic acid binding protein (AHRD V1 ***- D7LGX9_ARALY); contains Interpro domain(s) IPR014560 Uncharacterised conserved protein UCP030333, DNA/RNA-binding Alba-related	1
osa-miR529b	SlAlba5	4.5	-1	1	21	654	674	AGAAGAGAGAGAGUACAGCUU	:::.: : ::: :::::::.:	AAGUUCUUCUCCCUCUCUUUU	Translation	Nucleic acid binding protein (AHRD V1 ***- D7LGX9_ARALY); contains Interpro domain(s) IPR014560 Uncharacterised conserved protein UCP030333, DNA/RNA-binding Alba-related	1
osa-miR5821	SlAlba5	5	-1	1	21	96	116	UGGACGGAGCGAUGGUGGGCG	::: ::::.:::: ::. :	GUCCCUCCAUUGCUCAGUUGA	Cleavage	Nucleic acid binding protein (AHRD V1 ***- D7LGX9_ARALY); contains Interpro domain(s) IPR014560 Uncharacterised conserved protein UCP030333, DNA/RNA-binding Alba-related	1
ppt-miR156a	SlAlba5	5	-1	1	20	659	678	UGACAGAAGAGAGUGAGCAC	: ::: :::::::.:: :	CUUCUCCCUCUCUUUUGCCU	Cleavage	Nucleic acid binding protein (AHRD V1 ***- D7LGX9_ARALY); contains Interpro domain(s) IPR014560 Uncharacterised conserved protein UCP030333, DNA/RNA-binding Alba-related	1
ppt-miR529d	SlAlba5	4.5	-1	1	21	654	674	AGAAGAGAGAGAGCACAGCCC	:.: : ::: :::::::.:	AAGUUCUUCUCCCUCUCUUUU	Translation	Nucleic acid binding protein (AHRD V1 ***- D7LGX9_ARALY); contains Interpro domain(s) IPR014560 Uncharacterised conserved protein UCP030333, DNA/RNA-binding Alba-related	1
ptc-miR156a	SlAlba5	5	-1	1	20	659	678	UGACAGAAGAGAGUGAGCAC	: ::: :::::::.:: :	CUUCUCCCUCUCUUUUGCCU	Cleavage	Nucleic acid binding protein (AHRD V1 ***- D7LGX9_ARALY); contains Interpro domain(s) IPR014560 Uncharacterised conserved protein UCP030333, DNA/RNA-binding Alba-related	1
ptc-miR7814	SlAlba5	4.5	-1	1	21	506	526	UAGAUUGUUUUUAUGCUUUGA	:::: ::..::::::: :	CAAAAGGAUGGAAACAAUAUU	Cleavage	Nucleic acid binding protein (AHRD V1 ***- D7LGX9_ARALY); contains Interpro domain(s) IPR014560 Uncharacterised conserved protein UCP030333, DNA/RNA-binding Alba-related	1
rco-miR156a	SlAlba5	5	-1	1	21	658	678	UGACAGAAGAGAGUGAGCACA	: : ::: :::::::.:: :	UCUUCUCCCUCUCUUUUGCCU	Cleavage	Nucleic acid binding protein (AHRD V1 ***- D7LGX9_ARALY); contains Interpro domain(s) IPR014560 Uncharacterised conserved protein UCP030333, DNA/RNA-binding Alba-related	1
rgl-miR5576	SlAlba5	5	-1	1	23	309	331	AGAAGUUGGCAUUUGCAAACACU	:::: .:::: :.:.:::	CAGCUUUGGGAAUGGCGAUUUCA	Cleavage	Nucleic acid binding protein (AHRD V1 ***- D7LGX9_ARALY); contains Interpro domain(s) IPR014560 Uncharacterised conserved protein UCP030333, DNA/RNA-binding Alba-related	1
sbi-miR156a	SlAlba5	5	-1	1	20	659	678	UGACAGAAGAGAGUGAGCAC	: ::: :::::::.:: :	CUUCUCCCUCUCUUUUGCCU	Cleavage	Nucleic acid binding protein (AHRD V1 ***- D7LGX9_ARALY); contains Interpro domain(s) IPR014560 Uncharacterised conserved protein UCP030333, DNA/RNA-binding Alba-related	1
sly-miR156d-5p	SlAlba5	5	-1	1	20	659	678	UGACAGAAGAGAGUGAGCAC	: ::: :::::::.:: :	CUUCUCCCUCUCUUUUGCCU	Cleavage	Nucleic acid binding protein (AHRD V1 ***- D7LGX9_ARALY); contains Interpro domain(s) IPR014560 Uncharacterised conserved protein UCP030333, DNA/RNA-binding Alba-related	1
sly-miR9471a-3p	SlAlba5	5	-1	1	21	489	509	UUGGCUGAGUGAGCAUCACGG	::::::::.:: .:: ::	AGUUGAUGCUCGCUGGGCAAA	Cleavage	Nucleic acid binding protein (AHRD V1 ***- D7LGX9_ARALY); contains Interpro domain(s) IPR014560 Uncharacterised conserved protein UCP030333, DNA/RNA-binding Alba-related	1
sly-miR9471b-3p	SlAlba5	5	-1	1	21	489	509	UUGGCUGAGUGAGCAUCACUG	::::::::.:: .:: ::	AGUUGAUGCUCGCUGGGCAAA	Cleavage	Nucleic acid binding protein (AHRD V1 ***- D7LGX9_ARALY); contains Interpro domain(s) IPR014560 Uncharacterised conserved protein UCP030333, DNA/RNA-binding Alba-related	1
sly-miR9474-5p	SlAlba5	4.5	-1	1	22	382	403	UGUAGAAGUCAUGAAUAAAAUG	: :::::::::::::.	AAAAAAAAUCAUGACUUCUACG	Cleavage	Nucleic acid binding protein (AHRD V1 ***- D7LGX9_ARALY); contains Interpro domain(s) IPR014560 Uncharacterised conserved protein UCP030333, DNA/RNA-binding Alba-related	1
smo-miR156a	SlAlba5	5	-1	1	20	659	678	CGACAGAAGAGAGUGAGCAC	: ::: :::::::.:: :	CUUCUCCCUCUCUUUUGCCU	Cleavage	Nucleic acid binding protein (AHRD V1 ***- D7LGX9_ARALY); contains Interpro domain(s) IPR014560 Uncharacterised conserved protein UCP030333, DNA/RNA-binding Alba-related	1
stu-miR4376-3p	SlAlba5	4	-1	1	20	278	297	GCAUCAUACUCCUGCAUAUU	:::::::: ::::: :::	UAUAUGCAGCAGUAUAAUGA	Translation	Nucleic acid binding protein (AHRD V1 ***- D7LGX9_ARALY); contains Interpro domain(s) IPR014560 Uncharacterised conserved protein UCP030333, DNA/RNA-binding Alba-related	1
stu-miR7122-5p	SlAlba5	5	-1	1	22	634	654	UUAUACAGAGAAACCGCUGUCG	: :::: : :::::.::: :::	CUACAG-GUUUUCUUUGUCUAA	Cleavage	Nucleic acid binding protein (AHRD V1 ***- D7LGX9_ARALY); contains Interpro domain(s) IPR014560 Uncharacterised conserved protein UCP030333, DNA/RNA-binding Alba-related	1
stu-miR7991a	SlAlba5	5	-1	1	21	1	21	AGGAGGUCGGAAUUUUUAAUG	:: ::::::.: ..::::	UUAUACAAAUUCUGUUUUCCU	Cleavage	Nucleic acid binding protein (AHRD V1 ***- D7LGX9_ARALY); contains Interpro domain(s) IPR014560 Uncharacterised conserved protein UCP030333, DNA/RNA-binding Alba-related	1
stu-miR8031	SlAlba5	4	-1	1	23	693	715	UUAGACACCUCAACUAAGACUUG	:::: :: .:::::::::	GCCCUCUUUUUUUGGGUGUCUAA	Translation	Nucleic acid binding protein (AHRD V1 ***- D7LGX9_ARALY); contains Interpro domain(s) IPR014560 Uncharacterised conserved protein UCP030333, DNA/RNA-binding Alba-related	1
stu-miR8038a-3p	SlAlba5	4	-1	1	21	173	193	GUUCAACUUGCUCACUUGGAG	.::::::::: ::::::	GAAGGAGUGAGCAAUUUGAAC	Cleavage	Nucleic acid binding protein (AHRD V1 ***- D7LGX9_ARALY); contains Interpro domain(s) IPR014560 Uncharacterised conserved protein UCP030333, DNA/RNA-binding Alba-related	1
stu-miR8038b-3p	SlAlba5	4	-1	1	21	173	193	GUUCAACUUGCUCACUUGGAG	.::::::::: ::::::	GAAGGAGUGAGCAAUUUGAAC	Cleavage	Nucleic acid binding protein (AHRD V1 ***- D7LGX9_ARALY); contains Interpro domain(s) IPR014560 Uncharacterised conserved protein UCP030333, DNA/RNA-binding Alba-related	1
tae-miR156	SlAlba5	5	-1	1	21	658	678	UGACAGAAGAGAGUGAGCACA	: : ::: :::::::.:: :	UCUUCUCCCUCUCUUUUGCCU	Cleavage	Nucleic acid binding protein (AHRD V1 ***- D7LGX9_ARALY); contains Interpro domain(s) IPR014560 Uncharacterised conserved protein UCP030333, DNA/RNA-binding Alba-related	1
vvi-miR3624-5p	SlAlba5	5	-1	1	21	276	296	UAGUAUGCUGCUGUCUUUAGA	:: : .::::::.::: :.	GGUAUAUGCAGCAGUAUAAUG	Cleavage	Nucleic acid binding protein (AHRD V1 ***- D7LGX9_ARALY); contains Interpro domain(s) IPR014560 Uncharacterised conserved protein UCP030333, DNA/RNA-binding Alba-related	1
zma-miR156a-5p	SlAlba5	5	-1	1	20	659	678	UGACAGAAGAGAGUGAGCAC	: ::: :::::::.:: :	CUUCUCCCUCUCUUUUGCCU	Cleavage	Nucleic acid binding protein (AHRD V1 ***- D7LGX9_ARALY); contains Interpro domain(s) IPR014560 Uncharacterised conserved protein UCP030333, DNA/RNA-binding Alba-related	1
zma-miR156d-3p	SlAlba5	5	-1	1	22	163	184	GCUCACUUCUCUUUCUGUCAGC	: .:: :. ::.:::::::	AGAGUUAGCAGAAGGAGUGAGC	Translation	Nucleic acid binding protein (AHRD V1 ***- D7LGX9_ARALY); contains Interpro domain(s) IPR014560 Uncharacterised conserved protein UCP030333, DNA/RNA-binding Alba-related	1
zma-miR156d-5p	SlAlba5	5	-1	1	20	659	678	UGACAGAAGAGAGUGAGCAC	: ::: :::::::.:: :	CUUCUCCCUCUCUUUUGCCU	Cleavage	Nucleic acid binding protein (AHRD V1 ***- D7LGX9_ARALY); contains Interpro domain(s) IPR014560 Uncharacterised conserved protein UCP030333, DNA/RNA-binding Alba-related	1
zma-miR156f-3p	SlAlba5	5	-1	1	22	163	184	GCUCACUUCUCUUUCUGUCAGC	: .:: :. ::.:::::::	AGAGUUAGCAGAAGGAGUGAGC	Translation	Nucleic acid binding protein (AHRD V1 ***- D7LGX9_ARALY); contains Interpro domain(s) IPR014560 Uncharacterised conserved protein UCP030333, DNA/RNA-binding Alba-related	1
zma-miR156f-5p	SlAlba5	5	-1	1	20	659	678	UGACAGAAGAGAGUGAGCAC	: ::: :::::::.:: :	CUUCUCCCUCUCUUUUGCCU	Cleavage	Nucleic acid binding protein (AHRD V1 ***- D7LGX9_ARALY); contains Interpro domain(s) IPR014560 Uncharacterised conserved protein UCP030333, DNA/RNA-binding Alba-related	1
zma-miR156g-3p	SlAlba5	5	-1	1	22	163	184	GCUCACUUCUCUUUCUGUCAGC	: .:: :. ::.:::::::	AGAGUUAGCAGAAGGAGUGAGC	Translation	Nucleic acid binding protein (AHRD V1 ***- D7LGX9_ARALY); contains Interpro domain(s) IPR014560 Uncharacterised conserved protein UCP030333, DNA/RNA-binding Alba-related	1
zma-miR156g-5p	SlAlba5	5	-1	1	20	659	678	UGACAGAAGAGAGUGAGCAC	: ::: :::::::.:: :	CUUCUCCCUCUCUUUUGCCU	Cleavage	Nucleic acid binding protein (AHRD V1 ***- D7LGX9_ARALY); contains Interpro domain(s) IPR014560 Uncharacterised conserved protein UCP030333, DNA/RNA-binding Alba-related	1
zma-miR529-5p	SlAlba5	4.5	-1	1	21	654	674	AGAAGAGAGAGAGUACAGCCU	: :.: : ::: :::::::.:	AAGUUCUUCUCCCUCUCUUUU	Translation	Nucleic acid binding protein (AHRD V1 ***- D7LGX9_ARALY); contains Interpro domain(s) IPR014560 Uncharacterised conserved protein UCP030333, DNA/RNA-binding Alba-related	1
aly-miR3449-5p	SlAlba6	5	-1	1	21	1023	1043	UCUAGAUUGCUUUCGGUCUGU	:: .: :. :::::.::::	CAAGUUCAAGUGCAAUUUAGA	Translation	Ribonuclease P protein subunit p25 (AHRD V1 *--- RPP25_HUMAN); contains Interpro domain(s) IPR002775 Alba, DNA/RNA-binding protein	1
aly-miR400-3p	SlAlba6	4	-1	1	21	953	973	GACUUAUAAUAAUCUCAUGAA	::::: ::::::::.. :.	AGCAUGAAAUUAUUAUGGCUU	Cleavage	Ribonuclease P protein subunit p25 (AHRD V1 *--- RPP25_HUMAN); contains Interpro domain(s) IPR002775 Alba, DNA/RNA-binding protein	1
aly-miR4235	SlAlba6	5	-1	1	21	48	68	ACUGAAAACACUACAACCCCU	::::: ::: :::::.. :	GAGGGUUUUAGGGUUUUUGUU	Translation	Ribonuclease P protein subunit p25 (AHRD V1 *--- RPP25_HUMAN); contains Interpro domain(s) IPR002775 Alba, DNA/RNA-binding protein	1
aly-miR472-3p	SlAlba6	4	-1	1	22	198	219	UUUUUCCUACUCCGCCCAUACC	: : : :::::.:::::.:	UUCAGGAGAGGAGUGGGAAAGA	Cleavage	Ribonuclease P protein subunit p25 (AHRD V1 *--- RPP25_HUMAN); contains Interpro domain(s) IPR002775 Alba, DNA/RNA-binding protein	1
aly-miR834-5p	SlAlba6	5	-1	1	21	785	805	ACCACAGCUUCUGCUACGAAC	::.:::::.:.: ::::	GGAGGUGGCAGAGGUUAUGGU	Cleavage	Ribonuclease P protein subunit p25 (AHRD V1 *--- RPP25_HUMAN); contains Interpro domain(s) IPR002775 Alba, DNA/RNA-binding protein	1
aly-miR837-5p	SlAlba6	5	-1	1	21	946	966	CAUUGUUUCUUGUUUUUUUCA	: ::::::.:: ::::. ::	UAAAAAAAGCAUGAAAUUAUU	Translation	Ribonuclease P protein subunit p25 (AHRD V1 *--- RPP25_HUMAN); contains Interpro domain(s) IPR002775 Alba, DNA/RNA-binding protein	1
aly-miR838-3p	SlAlba6	3.5	-1	1	21	29	49	UUUUCUUCUUCUUCUUGCACA	::::::::::::::.:	CUCUGAAGAAGAAGAAGAAGA	Cleavage	Ribonuclease P protein subunit p25 (AHRD V1 *--- RPP25_HUMAN); contains Interpro domain(s) IPR002775 Alba, DNA/RNA-binding protein	1
aly-miR862-3p	SlAlba6	5	-1	1	21	373	393	ACAUGCUGGAUCUACUUGAAG	: .:: ::: .:.::::::	UGUGGAGCAGACUCGGCAUGU	Translation	Ribonuclease P protein subunit p25 (AHRD V1 *--- RPP25_HUMAN); contains Interpro domain(s) IPR002775 Alba, DNA/RNA-binding protein	1
aqc-miR482a	SlAlba6	5	-1	1	22	198	219	UCUUGCCGACUCCUCCCAUACC	: : ::::::: :: ::::	UUCAGGAGAGGAGUGGGAAAGA	Cleavage	Ribonuclease P protein subunit p25 (AHRD V1 *--- RPP25_HUMAN); contains Interpro domain(s) IPR002775 Alba, DNA/RNA-binding protein	1
ath-miR838	SlAlba6	5	-1	1	21	29	49	UUUUCUUCUACUUCUUGCACA	:::::: :::::::.:	CUCUGAAGAAGAAGAAGAAGA	Translation	Ribonuclease P protein subunit p25 (AHRD V1 *--- RPP25_HUMAN); contains Interpro domain(s) IPR002775 Alba, DNA/RNA-binding protein	1
bdi-miR166h-5p	SlAlba6	5	-1	1	21	234	254	GGUUUGUUGUCUGGCUCGGGG	.:.:.:::.:::.::.:	CAAUGGGUCAGGCAAUAAGCA	Cleavage	Ribonuclease P protein subunit p25 (AHRD V1 *--- RPP25_HUMAN); contains Interpro domain(s) IPR002775 Alba, DNA/RNA-binding protein	1
bdi-miR5163a-3p	SlAlba6	5	-1	1	21	1055	1075	UUAGGUAUUUCAGGUUAGGUG	....:: :.: ::::..::::	UGUUUAUCUUAAAAUGUCUAA	Translation	Ribonuclease P protein subunit p25 (AHRD V1 *--- RPP25_HUMAN); contains Interpro domain(s) IPR002775 Alba, DNA/RNA-binding protein	1
bdi-miR5182	SlAlba6	5	-1	1	21	991	1011	UGAUGAUCUUGGAACACGUGC	: .:: :::::. :::::.:	UCUUGUUUUCCAGCAUCAUUA	Cleavage	Ribonuclease P protein subunit p25 (AHRD V1 *--- RPP25_HUMAN); contains Interpro domain(s) IPR002775 Alba, DNA/RNA-binding protein	1
bdi-miR5199	SlAlba6	5	-1	1	21	312	332	UGUUCAUACGGUUGAUAGCAC	::::::::.:. .:::.::	CUGCUAUCAGCUCAGUGAGCA	Cleavage	Ribonuclease P protein subunit p25 (AHRD V1 *--- RPP25_HUMAN); contains Interpro domain(s) IPR002775 Alba, DNA/RNA-binding protein	1
bdi-miR7710-3p	SlAlba6	5	-1	1	24	961	984	AUUGAUGUCACAAACUAUAGUAGC	.::.:::.: :::: .::::.:	AUUAUUAUGGCUUGUUGCAUCGAC	Cleavage	Ribonuclease P protein subunit p25 (AHRD V1 *--- RPP25_HUMAN); contains Interpro domain(s) IPR002775 Alba, DNA/RNA-binding protein	1
bdi-miR7717c-5p	SlAlba6	4.5	-1	1	24	829	852	UUGCUAUUUCUUGGGCGACUGAGA	:: ::.:::::...:.::::	GGGCAACCGUCCAAGGGGUGGCAA	Cleavage	Ribonuclease P protein subunit p25 (AHRD V1 *--- RPP25_HUMAN); contains Interpro domain(s) IPR002775 Alba, DNA/RNA-binding protein	1
bdi-miR827-5p	SlAlba6	5	-1	1	22	678	699	UUUUGUUGGUUGUCAUCUAACC	: ::::.:::.: :::.:	AUGGAUAUGAUAACUAUCAAGA	Cleavage	Ribonuclease P protein subunit p25 (AHRD V1 *--- RPP25_HUMAN); contains Interpro domain(s) IPR002775 Alba, DNA/RNA-binding protein	1
bra-miR400-3p	SlAlba6	4.5	-1	1	21	953	973	GACUUAUAAUGAUCUCAUGAA	::::: ::.:::::.. :.	AGCAUGAAAUUAUUAUGGCUU	Cleavage	Ribonuclease P protein subunit p25 (AHRD V1 *--- RPP25_HUMAN); contains Interpro domain(s) IPR002775 Alba, DNA/RNA-binding protein	1
bra-miR5716	SlAlba6	5	-1	1	21	1055	1075	UUGGAUAAUUGAAGAUAUAAA	: : :::::: :: :.::.::	UGUUUAUCUUAAAAUGUCUAA	Translation	Ribonuclease P protein subunit p25 (AHRD V1 *--- RPP25_HUMAN); contains Interpro domain(s) IPR002775 Alba, DNA/RNA-binding protein	1
bra-miR9561-3p	SlAlba6	5	-1	1	22	45	66	GAGAGACUCUGAAAGACUCACC	::: :::.::.::.:.:	GAAGAGGGUUUUAGGGUUUUUG	Cleavage	Ribonuclease P protein subunit p25 (AHRD V1 *--- RPP25_HUMAN); contains Interpro domain(s) IPR002775 Alba, DNA/RNA-binding protein	1
csi-miR472	SlAlba6	5	-1	1	21	198	218	UUUUCCCACACCUCCCAUCCC	: : :::: ::::::::.	UUCAGGAGAGGAGUGGGAAAG	Translation	Ribonuclease P protein subunit p25 (AHRD V1 *--- RPP25_HUMAN); contains Interpro domain(s) IPR002775 Alba, DNA/RNA-binding protein	1
csi-miR482b	SlAlba6	5	-1	1	22	198	219	UCUUGCCCACCCCUCCCAUUCC	: : :::: ::::: ::::	UUCAGGAGAGGAGUGGGAAAGA	Translation	Ribonuclease P protein subunit p25 (AHRD V1 *--- RPP25_HUMAN); contains Interpro domain(s) IPR002775 Alba, DNA/RNA-binding protein	1
dpr-miR160	SlAlba6	5	-1	1	21	227	247	UGCCUGGCUCCUUGUAUGCCA	: : : .::: :.:.::::::	UUGAAAGCAAUGGGUCAGGCA	Translation	Ribonuclease P protein subunit p25 (AHRD V1 *--- RPP25_HUMAN); contains Interpro domain(s) IPR002775 Alba, DNA/RNA-binding protein	1
ghr-miR482a	SlAlba6	2.5	-1	1	22	198	219	UCUUUCCUACUCCUCCCAUACC	: : :::::::.:::::::	UUCAGGAGAGGAGUGGGAAAGA	Cleavage	Ribonuclease P protein subunit p25 (AHRD V1 *--- RPP25_HUMAN); contains Interpro domain(s) IPR002775 Alba, DNA/RNA-binding protein	1
gma-miR1510a-3p	SlAlba6	4.5	-1	1	23	229	251	UUGUUGUUUUACCUAUUCCACCC	: :::.::: :..:::.::	GAAAGCAAUGGGUCAGGCAAUAA	Translation	Ribonuclease P protein subunit p25 (AHRD V1 *--- RPP25_HUMAN); contains Interpro domain(s) IPR002775 Alba, DNA/RNA-binding protein	1
gma-miR1510a-5p	SlAlba6	5	-1	1	24	1042	1065	AGGGAUAGGUAAAACAAUGACUGC	.::: ::::...::::..	GACCAUAUUCUUUUGUUUAUCUUA	Cleavage	Ribonuclease P protein subunit p25 (AHRD V1 *--- RPP25_HUMAN); contains Interpro domain(s) IPR002775 Alba, DNA/RNA-binding protein	1
gma-miR1512a-5p	SlAlba6	5	-1	1	22	4	25	UAACUGAAAAUUCUUAAAGUAU	:::::..::: :::::.	UUCUGUUAAGGGUUUACAGUUG	Cleavage	Ribonuclease P protein subunit p25 (AHRD V1 *--- RPP25_HUMAN); contains Interpro domain(s) IPR002775 Alba, DNA/RNA-binding protein	1
gma-miR1512b	SlAlba6	5	-1	1	22	4	25	UAACUGGAAAUUCUUAAAGCAU	:::::..::: :::::.	UUCUGUUAAGGGUUUACAGUUG	Cleavage	Ribonuclease P protein subunit p25 (AHRD V1 *--- RPP25_HUMAN); contains Interpro domain(s) IPR002775 Alba, DNA/RNA-binding protein	1
gma-miR1513c	SlAlba6	5	-1	1	19	916	934	UAUGAGAGAAAGCCAUGAC	: ::::.:::::.:..:	AUAAUGGUUUUCUUUUGUC	Cleavage	Ribonuclease P protein subunit p25 (AHRD V1 *--- RPP25_HUMAN); contains Interpro domain(s) IPR002775 Alba, DNA/RNA-binding protein	1
gma-miR1530	SlAlba6	5	-1	1	21	58	78	UUUUCACAUAAAUUAAAAUAU	.:::: .::::: :::::	GGGUUUUUGUUUAUCAGAAAA	Cleavage	Ribonuclease P protein subunit p25 (AHRD V1 *--- RPP25_HUMAN); contains Interpro domain(s) IPR002775 Alba, DNA/RNA-binding protein	1
gma-miR171h	SlAlba6	4	-1	1	21	379	399	AUUGAGACGAGCCGAAUCAAU	:: ::::: .::::::::	GCAGACUCGGCAUGUCUCAAU	Translation	Ribonuclease P protein subunit p25 (AHRD V1 *--- RPP25_HUMAN); contains Interpro domain(s) IPR002775 Alba, DNA/RNA-binding protein	1
gma-miR393b	SlAlba6	4	-1	1	21	746	766	UUUGGGAUCAUGCUAUCCCUU	.:::::: :.::::.:...:	UGGGGAUAUCGUGAUUCUGGA	Cleavage	Ribonuclease P protein subunit p25 (AHRD V1 *--- RPP25_HUMAN); contains Interpro domain(s) IPR002775 Alba, DNA/RNA-binding protein	1
gma-miR4396	SlAlba6	5	-1	1	24	153	176	UGUAGUUUCUAAGACGAUGCUGAC	::: . : : ::::::::::::	CACAGGGACUUGUUAGAAACUACA	Cleavage	Ribonuclease P protein subunit p25 (AHRD V1 *--- RPP25_HUMAN); contains Interpro domain(s) IPR002775 Alba, DNA/RNA-binding protein	1
gma-miR4416c	SlAlba6	4.5	-1	1	21	917	937	CUGGGUGAGAGAAACACGUAU	:.: :::::.:...::::	UAAUGGUUUUCUUUUGUCCAG	Cleavage	Ribonuclease P protein subunit p25 (AHRD V1 *--- RPP25_HUMAN); contains Interpro domain(s) IPR002775 Alba, DNA/RNA-binding protein	1
gma-miR5033	SlAlba6	4	-1	1	21	919	939	GGCUGUACAAAAGGAAACUAC	:.::::.::::::: :::.	AUGGUUUUCUUUUGUCCAGUG	Cleavage	Ribonuclease P protein subunit p25 (AHRD V1 *--- RPP25_HUMAN); contains Interpro domain(s) IPR002775 Alba, DNA/RNA-binding protein	1
gma-miR5780a	SlAlba6	4.5	-1	1	23	308	330	AUCACUUAGCUGACGGUAGGGAC	::.:. :::::: :::::	GAUGCUGCUAUCAGCUCAGUGAG	Cleavage	Ribonuclease P protein subunit p25 (AHRD V1 *--- RPP25_HUMAN); contains Interpro domain(s) IPR002775 Alba, DNA/RNA-binding protein	1
gma-miR9760	SlAlba6	4.5	-1	1	21	163	183	UGGAUGAUGUAGUUUUGAUUG	: .::::::::::: :.:	UGUUAGAAACUACAUCAGCUA	Cleavage	Ribonuclease P protein subunit p25 (AHRD V1 *--- RPP25_HUMAN); contains Interpro domain(s) IPR002775 Alba, DNA/RNA-binding protein	1
gra-miR482	SlAlba6	4	-1	1	22	198	219	UCUUUCCAAUUCCUCCCAUUCC	: : :::::.: :::::::	UUCAGGAGAGGAGUGGGAAAGA	Cleavage	Ribonuclease P protein subunit p25 (AHRD V1 *--- RPP25_HUMAN); contains Interpro domain(s) IPR002775 Alba, DNA/RNA-binding protein	1
gra-miR8742a	SlAlba6	4	-1	1	21	669	689	UAUCUUAUUCAUCUUGGACUG	::::::::.::: ::::	AUUACCAAGAUGGAUAUGAUA	Cleavage	Ribonuclease P protein subunit p25 (AHRD V1 *--- RPP25_HUMAN); contains Interpro domain(s) IPR002775 Alba, DNA/RNA-binding protein	1
gra-miR8742b	SlAlba6	4	-1	1	21	669	689	UAUCUUAUUCAUCUUGGACUG	::::::::.::: ::::	AUUACCAAGAUGGAUAUGAUA	Cleavage	Ribonuclease P protein subunit p25 (AHRD V1 *--- RPP25_HUMAN); contains Interpro domain(s) IPR002775 Alba, DNA/RNA-binding protein	1
gra-miR8782	SlAlba6	5	-1	1	21	288	308	UUUGGUGUUGAAGGGGAAUAA	:::::.: :: .::.:::.	GAAUUCCUCGUCUGCAUCAAG	Cleavage	Ribonuclease P protein subunit p25 (AHRD V1 *--- RPP25_HUMAN); contains Interpro domain(s) IPR002775 Alba, DNA/RNA-binding protein	1
hci-miR156a	SlAlba6	5	-1	1	20	916	935	UGACAGAAGAGAGUGAGUAC	:: : ..:.::::.::::	AUAAUGGUUUUCUUUUGUCC	Cleavage	Ribonuclease P protein subunit p25 (AHRD V1 *--- RPP25_HUMAN); contains Interpro domain(s) IPR002775 Alba, DNA/RNA-binding protein	1
hme-miR-1b	SlAlba6	5	-1	1	22	981	1002	UGGGAAGUAAGGAAGCACGGAA	:: :.: .:::..::.:::	CGACGGGUUGUCUUGUUUUCCA	Cleavage	Ribonuclease P protein subunit p25 (AHRD V1 *--- RPP25_HUMAN); contains Interpro domain(s) IPR002775 Alba, DNA/RNA-binding protein	1
mdm-miR482b	SlAlba6	4.5	-1	1	22	198	219	UCUUUCCUAUCCCUCCCAUUCC	: : :::: .:.:::::::	UUCAGGAGAGGAGUGGGAAAGA	Translation	Ribonuclease P protein subunit p25 (AHRD V1 *--- RPP25_HUMAN); contains Interpro domain(s) IPR002775 Alba, DNA/RNA-binding protein	1
mtr-miR1510a-5p	SlAlba6	5	-1	1	21	228	248	UUGUCUUACCCAUUCCUCCCA	:: :: ::::::: ::.:::	UGAAAGCAAUGGGUCAGGCAA	Cleavage	Ribonuclease P protein subunit p25 (AHRD V1 *--- RPP25_HUMAN); contains Interpro domain(s) IPR002775 Alba, DNA/RNA-binding protein	1
mtr-miR2597	SlAlba6	5	-1	1	21	76	95	UUUGGUACUUCGUCGAUUUGA	:::: ::. :.::::::::	AAAAAUGGAU-AGGUACCAAA	Translation	Ribonuclease P protein subunit p25 (AHRD V1 *--- RPP25_HUMAN); contains Interpro domain(s) IPR002775 Alba, DNA/RNA-binding protein	1
mtr-miR2620	SlAlba6	4.5	-1	1	22	55	76	UUCUGAUAGACACCGGCUCUGC	.::.:.. :::.::::::::	UUAGGGUUUUUGUUUAUCAGAA	Cleavage	Ribonuclease P protein subunit p25 (AHRD V1 *--- RPP25_HUMAN); contains Interpro domain(s) IPR002775 Alba, DNA/RNA-binding protein	1
mtr-miR2636	SlAlba6	5	-1	1	21	465	485	UUUGGUUAGUGUGCUGAAUAU	:::::::::: :::::..:	AUAUUCAGCAGACUAAUUACU	Translation	Ribonuclease P protein subunit p25 (AHRD V1 *--- RPP25_HUMAN); contains Interpro domain(s) IPR002775 Alba, DNA/RNA-binding protein	1
mtr-miR2673a	SlAlba6	2.5	-1	1	22	30	51	CCUCUUCCUCUUCCUCUUCCAC	::::: ::::: :::::::	UCUGAAGAAGAAGAAGAAGAGG	Cleavage	Ribonuclease P protein subunit p25 (AHRD V1 *--- RPP25_HUMAN); contains Interpro domain(s) IPR002775 Alba, DNA/RNA-binding protein	1
mtr-miR2673b	SlAlba6	2.5	-1	1	22	30	51	CCUCUUCCUCUUCCUCUUCCAC	::::: ::::: :::::::	UCUGAAGAAGAAGAAGAAGAGG	Cleavage	Ribonuclease P protein subunit p25 (AHRD V1 *--- RPP25_HUMAN); contains Interpro domain(s) IPR002775 Alba, DNA/RNA-binding protein	1
mtr-miR393b-3p	SlAlba6	4	-1	1	21	746	766	UUUGGGAUCAUGCUAUCCCUU	.:::::: :.::::.:...:	UGGGGAUAUCGUGAUUCUGGA	Cleavage	Ribonuclease P protein subunit p25 (AHRD V1 *--- RPP25_HUMAN); contains Interpro domain(s) IPR002775 Alba, DNA/RNA-binding protein	1
mtr-miR5744	SlAlba6	4	-1	1	22	1053	1074	UAGGUAUUUUAAGGAGCACGUU	.:: . .::::::::..:::	UUUGUUUAUCUUAAAAUGUCUA	Cleavage	Ribonuclease P protein subunit p25 (AHRD V1 *--- RPP25_HUMAN); contains Interpro domain(s) IPR002775 Alba, DNA/RNA-binding protein	1
mtr-miR5757	SlAlba6	4.5	-1	1	21	866	886	UAGAGAUUUGUUUAACAGCCA	: :.::::.. ...:::::::	UAGUUGUUGGUUGGAUCUCUA	Translation	Ribonuclease P protein subunit p25 (AHRD V1 *--- RPP25_HUMAN); contains Interpro domain(s) IPR002775 Alba, DNA/RNA-binding protein	1
nta-miR6156	SlAlba6	5	-1	1	21	211	231	UUGAAGAUGUUCUAUUUCUGU	.:::: ::: :::.:: ::	UGGGAAAGAGAUCAUUUUGAA	Translation	Ribonuclease P protein subunit p25 (AHRD V1 *--- RPP25_HUMAN); contains Interpro domain(s) IPR002775 Alba, DNA/RNA-binding protein	1
osa-miR1438	SlAlba6	5	-1	1	22	947	968	AGGGUAAUUUUAUCAUUUUUAA	::::: ::.::::::.. :	AAAAAAAGCAUGAAAUUAUUAU	Cleavage	Ribonuclease P protein subunit p25 (AHRD V1 *--- RPP25_HUMAN); contains Interpro domain(s) IPR002775 Alba, DNA/RNA-binding protein	1
osa-miR166k-5p	SlAlba6	5	-1	1	21	234	254	GGUUUGUUGUCUGGCUCGAGG	.:.:.:::.:::.::.:	CAAUGGGUCAGGCAAUAAGCA	Cleavage	Ribonuclease P protein subunit p25 (AHRD V1 *--- RPP25_HUMAN); contains Interpro domain(s) IPR002775 Alba, DNA/RNA-binding protein	1
osa-miR1872	SlAlba6	4.5	-1	1	24	2	25	GAACUGUAAGUCUGUGACGGGUAA	: .:.::.: .:..::::::::	GUUUCUGUUAAGGGUUUACAGUUG	Cleavage	Ribonuclease P protein subunit p25 (AHRD V1 *--- RPP25_HUMAN); contains Interpro domain(s) IPR002775 Alba, DNA/RNA-binding protein	1
osa-miR1882a	SlAlba6	4.5	-1	1	24	216	239	AGAUUGCUUUCAAGGUCAUUUCUU	::::.:: :..:::::::::::	AAGAGAUCAUUUUGAAAGCAAUGG	Cleavage	Ribonuclease P protein subunit p25 (AHRD V1 *--- RPP25_HUMAN); contains Interpro domain(s) IPR002775 Alba, DNA/RNA-binding protein	1
osa-miR5822	SlAlba6	5	-1	1	21	458	478	UGUCUGCUCGAUGUCAGGUUG	.::::.::. :::::::	CCUUCUGAUAUUCAGCAGACU	Cleavage	Ribonuclease P protein subunit p25 (AHRD V1 *--- RPP25_HUMAN); contains Interpro domain(s) IPR002775 Alba, DNA/RNA-binding protein	1
osa-miR5830	SlAlba6	5	-1	1	24	281	304	AUGUAGAUGAGGUGAUGUUACACA	:: : . ::::.:::.:::	AAGAGAAGAAUUCCUCGUCUGCAU	Cleavage	Ribonuclease P protein subunit p25 (AHRD V1 *--- RPP25_HUMAN); contains Interpro domain(s) IPR002775 Alba, DNA/RNA-binding protein	1
osa-miR815a	SlAlba6	4.5	-1	1	21	394	414	AAGGGGAUUGAGGAGAUUGGG	:.:::: ..:::::: ::::	CUCAAUGAUUUCAAUCACCUU	Cleavage	Ribonuclease P protein subunit p25 (AHRD V1 *--- RPP25_HUMAN); contains Interpro domain(s) IPR002775 Alba, DNA/RNA-binding protein	1
pab-miR482a	SlAlba6	4	-1	1	22	198	219	UCUUCCCUACUCCUCCCAUUCC	: : :::::::.:: ::::	UUCAGGAGAGGAGUGGGAAAGA	Cleavage	Ribonuclease P protein subunit p25 (AHRD V1 *--- RPP25_HUMAN); contains Interpro domain(s) IPR002775 Alba, DNA/RNA-binding protein	1
pde-miR396	SlAlba6	5	-1	1	21	195	215	UCCCACGGCUUUCUUGAACUU	::::.::.:: ::::::	UGCUUCAGGAGAGGAGUGGGA	Cleavage	Ribonuclease P protein subunit p25 (AHRD V1 *--- RPP25_HUMAN); contains Interpro domain(s) IPR002775 Alba, DNA/RNA-binding protein	1
pde-miR482a	SlAlba6	2.5	-1	1	22	198	219	UCUUUCCUACUCCUCCCAUUCC	: : :::::::.:::::::	UUCAGGAGAGGAGUGGGAAAGA	Cleavage	Ribonuclease P protein subunit p25 (AHRD V1 *--- RPP25_HUMAN); contains Interpro domain(s) IPR002775 Alba, DNA/RNA-binding protein	1
pde-miR482b	SlAlba6	4.5	-1	1	22	198	219	UCUUCCCUAUUCCUCCCAUUCC	: : :::::.:.:: ::::	UUCAGGAGAGGAGUGGGAAAGA	Cleavage	Ribonuclease P protein subunit p25 (AHRD V1 *--- RPP25_HUMAN); contains Interpro domain(s) IPR002775 Alba, DNA/RNA-binding protein	1
ppt-miR1069-3p	SlAlba6	5	-1	1	21	53	73	UGAUAAAUCAAAGUGCUCACU	: :: ..::: .:::::::	UUUUAGGGUUUUUGUUUAUCA	Cleavage	Ribonuclease P protein subunit p25 (AHRD V1 *--- RPP25_HUMAN); contains Interpro domain(s) IPR002775 Alba, DNA/RNA-binding protein	1
ppt-miR1075	SlAlba6	4.5	-1	1	21	633	653	UGUUUCAGUCAUGGUUUCUAC	: ::... :.::..::.::::	GCAGGGGACGUGGUUGGAACA	Cleavage	Ribonuclease P protein subunit p25 (AHRD V1 *--- RPP25_HUMAN); contains Interpro domain(s) IPR002775 Alba, DNA/RNA-binding protein	1
ppt-miR160g	SlAlba6	5	-1	1	21	227	247	UGCCUGGCUCCUUGUAUGCCA	: : : .::: :.:.::::::	UUGAAAGCAAUGGGUCAGGCA	Translation	Ribonuclease P protein subunit p25 (AHRD V1 *--- RPP25_HUMAN); contains Interpro domain(s) IPR002775 Alba, DNA/RNA-binding protein	1
pta-miR482a	SlAlba6	4	-1	1	22	198	219	UCUUCCCUACUCCUCCCAUUCC	: : :::::::.:: ::::	UUCAGGAGAGGAGUGGGAAAGA	Cleavage	Ribonuclease P protein subunit p25 (AHRD V1 *--- RPP25_HUMAN); contains Interpro domain(s) IPR002775 Alba, DNA/RNA-binding protein	1
pta-miR482b	SlAlba6	4	-1	1	22	198	219	UCUUCCCUACUCCUCCCAUUCC	: : :::::::.:: ::::	UUCAGGAGAGGAGUGGGAAAGA	Cleavage	Ribonuclease P protein subunit p25 (AHRD V1 *--- RPP25_HUMAN); contains Interpro domain(s) IPR002775 Alba, DNA/RNA-binding protein	1
pta-miR482c	SlAlba6	4.5	-1	1	20	200	219	UCUUCCCUAUUCCUCCCAUU	: : :::::.:.:: ::::	CAGGAGAGGAGUGGGAAAGA	Cleavage	Ribonuclease P protein subunit p25 (AHRD V1 *--- RPP25_HUMAN); contains Interpro domain(s) IPR002775 Alba, DNA/RNA-binding protein	1
ptc-miR472b	SlAlba6	5	-1	1	22	776	797	UUUUCCCAACUCCACCCAUCCC	: :::::::: ::: :.:.	GUCAGGGGUGGAGGUGGCAGAG	Cleavage	Ribonuclease P protein subunit p25 (AHRD V1 *--- RPP25_HUMAN); contains Interpro domain(s) IPR002775 Alba, DNA/RNA-binding protein	1
ptc-miR482a.2	SlAlba6	4	-1	1	20	200	219	UCUUGCCUACUCCUCCCAUU	: : :::::::.:: ::::	CAGGAGAGGAGUGGGAAAGA	Cleavage	Ribonuclease P protein subunit p25 (AHRD V1 *--- RPP25_HUMAN); contains Interpro domain(s) IPR002775 Alba, DNA/RNA-binding protein	1
ptc-miR482c-3p	SlAlba6	5	-1	1	22	198	219	UCUUUCCGAGUCCUCCCAUACC	: : ::::: : :::::::	UUCAGGAGAGGAGUGGGAAAGA	Translation	Ribonuclease P protein subunit p25 (AHRD V1 *--- RPP25_HUMAN); contains Interpro domain(s) IPR002775 Alba, DNA/RNA-binding protein	1
sbi-miR5568d-5p	SlAlba6	5	-1	1	21	759	779	UGGCUUUUCUAGAUACAUAGC	.: :: :: :.:::.::.::	AUUCUGGAUAUGGAAGAGUCA	Cleavage	Ribonuclease P protein subunit p25 (AHRD V1 *--- RPP25_HUMAN); contains Interpro domain(s) IPR002775 Alba, DNA/RNA-binding protein	1
sbi-miR5568g-5p	SlAlba6	4.5	-1	1	21	1062	1082	CAAAUUAUAAGAUGUUUUGGC	..::::..::: :: :::::	CUUAAAAUGUCUAAUCAUUUG	Cleavage	Ribonuclease P protein subunit p25 (AHRD V1 *--- RPP25_HUMAN); contains Interpro domain(s) IPR002775 Alba, DNA/RNA-binding protein	1
sly-miR482e-3p	SlAlba6	2.5	-1	1	22	198	219	UCUUUCCUACUCCUCCCAUACC	: : :::::::.:::::::	UUCAGGAGAGGAGUGGGAAAGA	Cleavage	Ribonuclease P protein subunit p25 (AHRD V1 *--- RPP25_HUMAN); contains Interpro domain(s) IPR002775 Alba, DNA/RNA-binding protein	1
sly-miR9471b-5p	SlAlba6	4.5	-1	1	21	316	336	GAGGUGCUCACUCAGCUAAUA	::: :::: ::::::::.: :	UAUCAGCUCAGUGAGCAUCAC	Cleavage	Ribonuclease P protein subunit p25 (AHRD V1 *--- RPP25_HUMAN); contains Interpro domain(s) IPR002775 Alba, DNA/RNA-binding protein	1
smo-miR1103-3p	SlAlba6	5	-1	1	24	913	936	UGGAAAAAGGAGGUGCAUUCUUGU	: :::: ..::.::: ::::	GGCAUAAUGGUUUUCUUUUGUCCA	Cleavage	Ribonuclease P protein subunit p25 (AHRD V1 *--- RPP25_HUMAN); contains Interpro domain(s) IPR002775 Alba, DNA/RNA-binding protein	1
stu-miR7122-5p	SlAlba6	4.5	-1	1	22	17	38	UUAUACAGAGAAACCGCUGUCG	::::. ::::::::: : ::	UUACAGUUGUUUCUCUGAAGAA	Cleavage	Ribonuclease P protein subunit p25 (AHRD V1 *--- RPP25_HUMAN); contains Interpro domain(s) IPR002775 Alba, DNA/RNA-binding protein	1
vvi-miR482	SlAlba6	2.5	-1	1	22	198	219	UCUUUCCUACUCCUCCCAUUCC	: : :::::::.:::::::	UUCAGGAGAGGAGUGGGAAAGA	Cleavage	Ribonuclease P protein subunit p25 (AHRD V1 *--- RPP25_HUMAN); contains Interpro domain(s) IPR002775 Alba, DNA/RNA-binding protein	1
aly-miR166g-5p	SlAlba7	5	-1	1	21	449	469	GGAAUGUUGUUUGGCUCGAGG	::::..::::::: :.:	ACAAGAGCUGAACAACAAUUC	Cleavage	Ribonuclease P protein subunit p25 (AHRD V1 *--- RPP25_HUMAN); contains Interpro domain(s) IPR002775 Alba, DNA/RNA-binding protein	1
aly-miR2112-3p	SlAlba7	4.5	-1	1	21	1116	1136	CUUUAUAUCCGCAUUUGCGCA	::..: : .::::::.:::	GUCGUGACUCUGGAUAUGAAG	Cleavage	Ribonuclease P protein subunit p25 (AHRD V1 *--- RPP25_HUMAN); contains Interpro domain(s) IPR002775 Alba, DNA/RNA-binding protein	1
aly-miR4250	SlAlba7	5	-1	1	21	386	406	UCCAAAGGCACAAGAACAUCA	:: : :::: ::::: ::::	AGAGGGUCUUUUGCCUGUGGA	Translation	Ribonuclease P protein subunit p25 (AHRD V1 *--- RPP25_HUMAN); contains Interpro domain(s) IPR002775 Alba, DNA/RNA-binding protein	1
aly-miR828-5p	SlAlba7	5	-1	1	22	586	607	UCUUGCUUAAAUGAGUAUUCCA	::: :.:::: :..::.::.	AUGAAGAUUCAUAUGGGCGAGG	Translation	Ribonuclease P protein subunit p25 (AHRD V1 *--- RPP25_HUMAN); contains Interpro domain(s) IPR002775 Alba, DNA/RNA-binding protein	1
aly-miR837-5p	SlAlba7	5	-1	1	21	1282	1302	CAUUGUUUCUUGUUUUUUUCA	:.::::.:: ::::. .::	AAAGAAAAGCAUGAAAUUGUG	Translation	Ribonuclease P protein subunit p25 (AHRD V1 *--- RPP25_HUMAN); contains Interpro domain(s) IPR002775 Alba, DNA/RNA-binding protein	1
aly-miR847-5p	SlAlba7	4.5	-1	1	21	212	232	UCUUGAUGAAGAGGAAUGGAA	: :.: : :::::: :::.::	UGCUAAUACUCUUCUUCAGGA	Cleavage	Ribonuclease P protein subunit p25 (AHRD V1 *--- RPP25_HUMAN); contains Interpro domain(s) IPR002775 Alba, DNA/RNA-binding protein	1
aly-miR859-5p	SlAlba7	3.5	-1	1	21	96	116	UCUCUCCGUUGUAAAAUCAAA	:.::::::::.::: :::	UAGGGUUUUACAAUGGAUAGA	Cleavage	Ribonuclease P protein subunit p25 (AHRD V1 *--- RPP25_HUMAN); contains Interpro domain(s) IPR002775 Alba, DNA/RNA-binding protein	1
ath-miR2112-3p	SlAlba7	4.5	-1	1	21	1116	1136	CUUUAUAUCCGCAUUUGCGCA	::..: : .::::::.:::	GUCGUGACUCUGGAUAUGAAG	Cleavage	Ribonuclease P protein subunit p25 (AHRD V1 *--- RPP25_HUMAN); contains Interpro domain(s) IPR002775 Alba, DNA/RNA-binding protein	1
ath-miR5020c	SlAlba7	4.5	-1	1	21	24	44	UGGCAUGGAAGAAGGUGAGAC	:.:::::::::::: :.	UGGUUACCUUCUUCCAUCCUU	Cleavage	Ribonuclease P protein subunit p25 (AHRD V1 *--- RPP25_HUMAN); contains Interpro domain(s) IPR002775 Alba, DNA/RNA-binding protein	1
ath-miR5641	SlAlba7	4	-1	1	21	19	39	UGGAAGAAGAUGAUAGAAUUA	: :::. .:.: :::::::::	UUAUUUGGUUACCUUCUUCCA	Translation	Ribonuclease P protein subunit p25 (AHRD V1 *--- RPP25_HUMAN); contains Interpro domain(s) IPR002775 Alba, DNA/RNA-binding protein	1
ath-miR828	SlAlba7	5	-1	1	22	586	607	UCUUGCUUAAAUGAGUAUUCCA	::: :.:::: :..::.::.	AUGAAGAUUCAUAUGGGCGAGG	Translation	Ribonuclease P protein subunit p25 (AHRD V1 *--- RPP25_HUMAN); contains Interpro domain(s) IPR002775 Alba, DNA/RNA-binding protein	1
ath-miR837-5p	SlAlba7	4.5	-1	1	21	657	677	AUCAGUUUCUUGUUCGUUUCA	::::: : ::::::: ::.:	GGAAACUAUCAAGAAAAUGGU	Cleavage	Ribonuclease P protein subunit p25 (AHRD V1 *--- RPP25_HUMAN); contains Interpro domain(s) IPR002775 Alba, DNA/RNA-binding protein	1
ath-miR859	SlAlba7	5	-1	1	21	96	116	UCUCUCUGUUGUGAAGUCAAA	:..::.::::..:: :::	UAGGGUUUUACAAUGGAUAGA	Cleavage	Ribonuclease P protein subunit p25 (AHRD V1 *--- RPP25_HUMAN); contains Interpro domain(s) IPR002775 Alba, DNA/RNA-binding protein	1
bdi-miR164a-3p	SlAlba7	5	-1	1	21	637	657	CAUGUGCCCUUCUUCUCCACC	: ::::: :::.: : :.:::	GUUGGAGCAGAGGUGGAUAUG	Cleavage	Ribonuclease P protein subunit p25 (AHRD V1 *--- RPP25_HUMAN); contains Interpro domain(s) IPR002775 Alba, DNA/RNA-binding protein	1
bdi-miR5198	SlAlba7	4.5	-1	1	21	1439	1459	GGGGAAAAGAGAUUGAGGGAG	: .::.:::.:.::: ::::	AUAUCUUAAUUUUUUUCCCCC	Cleavage	Ribonuclease P protein subunit p25 (AHRD V1 *--- RPP25_HUMAN); contains Interpro domain(s) IPR002775 Alba, DNA/RNA-binding protein	1
bdi-miR7753-5p	SlAlba7	5	-1	1	21	597	617	AUGUCUUCUUCCUUGCUCAUC	:::.::.:::: ::.: :.:	UAUGGGCGAGGACGAGGUCGU	Cleavage	Ribonuclease P protein subunit p25 (AHRD V1 *--- RPP25_HUMAN); contains Interpro domain(s) IPR002775 Alba, DNA/RNA-binding protein	1
bdi-miR7786-5p	SlAlba7	5	-1	1	24	1143	1166	GUCUAUGUCUAUGUCUGUGCACGC	.:..:::. .:::.:.:::	GAGGUUAUGGACGCGGACGUGGAC	Translation	Ribonuclease P protein subunit p25 (AHRD V1 *--- RPP25_HUMAN); contains Interpro domain(s) IPR002775 Alba, DNA/RNA-binding protein	1
bdi-miR9493	SlAlba7	5	-1	1	24	1237	1260	AAGAAUUAUGAAACGAAGGGAGUA	: :::: :::: .::.:: ::	AGAUGCCUUGGUUUAGUAGUUAUU	Translation	Ribonuclease P protein subunit p25 (AHRD V1 *--- RPP25_HUMAN); contains Interpro domain(s) IPR002775 Alba, DNA/RNA-binding protein	1
cme-miR828	SlAlba7	4.5	-1	1	22	586	607	UCUUGCUCAAAUGAGUAUUCCA	::: :.:::: ::.::.::.	AUGAAGAUUCAUAUGGGCGAGG	Translation	Ribonuclease P protein subunit p25 (AHRD V1 *--- RPP25_HUMAN); contains Interpro domain(s) IPR002775 Alba, DNA/RNA-binding protein	1
csi-miR482a-3p	SlAlba7	4	-1	1	22	226	247	UCUUCCCUAUGCCUCCCAUUCC	: : :::::::.:: ::::	UUCAGGAGAGGCAUGGGAAAGA	Cleavage	Ribonuclease P protein subunit p25 (AHRD V1 *--- RPP25_HUMAN); contains Interpro domain(s) IPR002775 Alba, DNA/RNA-binding protein	1
dpr-miR160	SlAlba7	5	-1	1	21	255	275	UGCCUGGCUCCUUGUAUGCCA	: : : .::: :.:.::::::	UUGAAAGCAAUGGGUCAGGCA	Translation	Ribonuclease P protein subunit p25 (AHRD V1 *--- RPP25_HUMAN); contains Interpro domain(s) IPR002775 Alba, DNA/RNA-binding protein	1
ghr-miR7507	SlAlba7	4.5	-1	1	24	10	33	AAGGUAGUGAAGUAGGCAAUUGGG	: ::.::.:: ..::::::	GGGGUUAGCUUAUUUGGUUACCUU	Cleavage	Ribonuclease P protein subunit p25 (AHRD V1 *--- RPP25_HUMAN); contains Interpro domain(s) IPR002775 Alba, DNA/RNA-binding protein	1
gma-miR166h-5p	SlAlba7	5	-1	1	21	449	469	GGAAUGUUGUUUGGCUCGAGG	::::..::::::: :.:	ACAAGAGCUGAACAACAAUUC	Cleavage	Ribonuclease P protein subunit p25 (AHRD V1 *--- RPP25_HUMAN); contains Interpro domain(s) IPR002775 Alba, DNA/RNA-binding protein	1
gma-miR166j-5p	SlAlba7	5	-1	1	21	449	469	GGAAUGUUGUUUGGCUCGAGG	::::..::::::: :.:	ACAAGAGCUGAACAACAAUUC	Cleavage	Ribonuclease P protein subunit p25 (AHRD V1 *--- RPP25_HUMAN); contains Interpro domain(s) IPR002775 Alba, DNA/RNA-binding protein	1
gma-miR4372b	SlAlba7	4.5	-1	1	22	1309	1330	UAAUAAAAUCGUGACAUGUAAC	: :.::: ..:::::::::.	UUCAUAUGCAGUGAUUUUAUUG	Cleavage	Ribonuclease P protein subunit p25 (AHRD V1 *--- RPP25_HUMAN); contains Interpro domain(s) IPR002775 Alba, DNA/RNA-binding protein	1
gma-miR4395	SlAlba7	5	-1	1	22	208	229	UGGAUAGGAGUAUGGGCUUGAG	.: ::. ::::::.: :.::	ACUAUGCUAAUACUCUUCUUCA	Cleavage	Ribonuclease P protein subunit p25 (AHRD V1 *--- RPP25_HUMAN); contains Interpro domain(s) IPR002775 Alba, DNA/RNA-binding protein	1
gma-miR4995	SlAlba7	4.5	-1	1	21	325	345	AGGCAGUGGCUUGGUUAAGGG	::: :.:::: ::::::.	UACUUCAUCAAGACACUGCUA	Cleavage	Ribonuclease P protein subunit p25 (AHRD V1 *--- RPP25_HUMAN); contains Interpro domain(s) IPR002775 Alba, DNA/RNA-binding protein	1
gma-miR828a	SlAlba7	4.5	-1	1	22	586	607	UCUUGCUCAAAUGAGUAUUCCA	::: :.:::: ::.::.::.	AUGAAGAUUCAUAUGGGCGAGG	Translation	Ribonuclease P protein subunit p25 (AHRD V1 *--- RPP25_HUMAN); contains Interpro domain(s) IPR002775 Alba, DNA/RNA-binding protein	1
gma-miR828b	SlAlba7	4.5	-1	1	22	586	607	UCUUGCUCAAAUGAGUAUUCCA	::: :.:::: ::.::.::.	AUGAAGAUUCAUAUGGGCGAGG	Translation	Ribonuclease P protein subunit p25 (AHRD V1 *--- RPP25_HUMAN); contains Interpro domain(s) IPR002775 Alba, DNA/RNA-binding protein	1
gma-miR9726	SlAlba7	4	-1	1	22	305	326	UAUAGGCAUUAUUUUUUUCUUC	::.:.:: :.::::::::	CAUCAAGAGAAGAGUGCCUAUA	Translation	Ribonuclease P protein subunit p25 (AHRD V1 *--- RPP25_HUMAN); contains Interpro domain(s) IPR002775 Alba, DNA/RNA-binding protein	1
gma-miR9732	SlAlba7	5	-1	1	21	1212	1233	CAAGGGUAUGAUGUG-CAAUCU	.::::: :::::..:....:::	GGAUUGGCACAUUGUGUUUUUG	Cleavage	Ribonuclease P protein subunit p25 (AHRD V1 *--- RPP25_HUMAN); contains Interpro domain(s) IPR002775 Alba, DNA/RNA-binding protein	1
gma-miR9737	SlAlba7	4.5	-1	1	22	420	441	UUGUGGCUGAAAUCACUGUUGC	::::::::::: .:::.	GUUUCAGUGAUUUCAAUCACGU	Cleavage	Ribonuclease P protein subunit p25 (AHRD V1 *--- RPP25_HUMAN); contains Interpro domain(s) IPR002775 Alba, DNA/RNA-binding protein	1
gma-miR9760	SlAlba7	3.5	-1	1	21	191	211	UGGAUGAUGUAGUUUUGAUUG	::.::::::::::: :.:	UGUUCGAAACUACAUCAACUA	Cleavage	Ribonuclease P protein subunit p25 (AHRD V1 *--- RPP25_HUMAN); contains Interpro domain(s) IPR002775 Alba, DNA/RNA-binding protein	1
gra-miR482	SlAlba7	5	-1	1	22	226	247	UCUUUCCAAUUCCUCCCAUUCC	: : :::: :: :::::::	UUCAGGAGAGGCAUGGGAAAGA	Translation	Ribonuclease P protein subunit p25 (AHRD V1 *--- RPP25_HUMAN); contains Interpro domain(s) IPR002775 Alba, DNA/RNA-binding protein	1
gra-miR7504n	SlAlba7	5	-1	1	24	1307	1331	AGGAUAAAAUUACUG-AUGUGGCAU	.: .::.:: ::::.:::::::. :	GUUUCAUAUGCAGUGAUUUUAUUGU	Cleavage	Ribonuclease P protein subunit p25 (AHRD V1 *--- RPP25_HUMAN); contains Interpro domain(s) IPR002775 Alba, DNA/RNA-binding protein	1
gra-miR8661	SlAlba7	5	-1	1	21	1101	1121	CAUUACUUUUUCAUUCAUUAA	..::.:::..::.:: .::	GAGGUGGAUGGGAAGGUCGUG	Cleavage	Ribonuclease P protein subunit p25 (AHRD V1 *--- RPP25_HUMAN); contains Interpro domain(s) IPR002775 Alba, DNA/RNA-binding protein	1
gra-miR8722	SlAlba7	5	-1	1	22	1100	1121	CAUGUUUUUCCUGUUCAUCUUC	.::.::.:..::::.. :.::	CGAGGUGGAUGGGAAGGUCGUG	Cleavage	Ribonuclease P protein subunit p25 (AHRD V1 *--- RPP25_HUMAN); contains Interpro domain(s) IPR002775 Alba, DNA/RNA-binding protein	1
gra-miR8737	SlAlba7	4.5	-1	1	24	216	239	GUGUAUCUCCUGAAAACGACGACA	:: : ::::::::: .::.	AAUACUCUUCUUCAGGAGAGGCAU	Cleavage	Ribonuclease P protein subunit p25 (AHRD V1 *--- RPP25_HUMAN); contains Interpro domain(s) IPR002775 Alba, DNA/RNA-binding protein	1
gra-miR8772	SlAlba7	4	-1	1	21	500	520	UUGGACUGUGGCUACAUAUAG	: ::: ::::::::: .::	ACAGAUGAAGCCACAGUAUAA	Cleavage	Ribonuclease P protein subunit p25 (AHRD V1 *--- RPP25_HUMAN); contains Interpro domain(s) IPR002775 Alba, DNA/RNA-binding protein	1
hvu-miR6180	SlAlba7	5	-1	1	20	24	43	AGGGUGGAAGAAAGAGGGCG	.: .. : ::::::::.:::	UGGUUACCUUCUUCCAUCCU	Cleavage	Ribonuclease P protein subunit p25 (AHRD V1 *--- RPP25_HUMAN); contains Interpro domain(s) IPR002775 Alba, DNA/RNA-binding protein	1
hvu-miR6192	SlAlba7	5	-1	1	22	44	65	UAGGAGAGGGGGGAAGGGAUCU	:.:::::: .:.::::. :	UCCUUCCUUCCAUCUUCUCUCA	Translation	Ribonuclease P protein subunit p25 (AHRD V1 *--- RPP25_HUMAN); contains Interpro domain(s) IPR002775 Alba, DNA/RNA-binding protein	1
lja-miR7533a	SlAlba7	5	-1	1	21	42	62	GAGGGGAUGGAGAGAAGCUGG	:::: .::::::..:::	CUUCCUUCCUUCCAUCUUCUC	Cleavage	Ribonuclease P protein subunit p25 (AHRD V1 *--- RPP25_HUMAN); contains Interpro domain(s) IPR002775 Alba, DNA/RNA-binding protein	1
lja-miR7533b	SlAlba7	5	-1	1	21	42	62	GAGGGGAUGGAGAGAAGCUGG	:::: .::::::..:::	CUUCCUUCCUUCCAUCUUCUC	Cleavage	Ribonuclease P protein subunit p25 (AHRD V1 *--- RPP25_HUMAN); contains Interpro domain(s) IPR002775 Alba, DNA/RNA-binding protein	1
mdm-miR482b	SlAlba7	4	-1	1	22	226	247	UCUUUCCUAUCCCUCCCAUUCC	: : :::: ::.:::::::	UUCAGGAGAGGCAUGGGAAAGA	Translation	Ribonuclease P protein subunit p25 (AHRD V1 *--- RPP25_HUMAN); contains Interpro domain(s) IPR002775 Alba, DNA/RNA-binding protein	1
mdm-miR7121a	SlAlba7	5	-1	1	21	294	315	UCCUCUUGGUGAUCGCC-CUGU	:.:: :: :::::.:::::: :	AUAGCGGAGAUCAUCAAGAGAA	Cleavage	Ribonuclease P protein subunit p25 (AHRD V1 *--- RPP25_HUMAN); contains Interpro domain(s) IPR002775 Alba, DNA/RNA-binding protein	1
mdm-miR828a	SlAlba7	4.5	-1	1	22	586	607	UCUUGCUCAAAUGAGUAUUCCA	::: :.:::: ::.::.::.	AUGAAGAUUCAUAUGGGCGAGG	Translation	Ribonuclease P protein subunit p25 (AHRD V1 *--- RPP25_HUMAN); contains Interpro domain(s) IPR002775 Alba, DNA/RNA-binding protein	1
mtr-miR1510a-5p	SlAlba7	5	-1	1	21	256	276	UUGUCUUACCCAUUCCUCCCA	:: :: ::::::: ::.:::	UGAAAGCAAUGGGUCAGGCAA	Cleavage	Ribonuclease P protein subunit p25 (AHRD V1 *--- RPP25_HUMAN); contains Interpro domain(s) IPR002775 Alba, DNA/RNA-binding protein	1
mtr-miR2629h	SlAlba7	3.5	-1	1	24	376	399	GCAGAAGAUCCUCGGCAGUUAACU	:: ::.:: ::::.::::.:::	AGCCAAUUGAAGAGGGUCUUUUGC	Cleavage	Ribonuclease P protein subunit p25 (AHRD V1 *--- RPP25_HUMAN); contains Interpro domain(s) IPR002775 Alba, DNA/RNA-binding protein	1
mtr-miR2675	SlAlba7	5	-1	1	21	1226	1246	CGAGGCAUAUUUGCAGGGAUU	.:...:::: : ::::::.:	UGUUUUUGCACAGAUGCCUUG	Translation	Ribonuclease P protein subunit p25 (AHRD V1 *--- RPP25_HUMAN); contains Interpro domain(s) IPR002775 Alba, DNA/RNA-binding protein	1
mtr-miR5212-5p	SlAlba7	4	-1	1	22	151	172	UGGAUUUCGUAUUUCUUUGGUA	.::: .:.:::::.::.:.	CCAUAAAUGAGUACGAGAUUCG	Cleavage	Ribonuclease P protein subunit p25 (AHRD V1 *--- RPP25_HUMAN); contains Interpro domain(s) IPR002775 Alba, DNA/RNA-binding protein	1
mtr-miR5239	SlAlba7	5	-1	1	21	47	67	UGGGAGAAAAGAUAGAAUGUG	: ::: ::::: :::: ::	UUCCUUCCAUCUUCUCUCACA	Cleavage	Ribonuclease P protein subunit p25 (AHRD V1 *--- RPP25_HUMAN); contains Interpro domain(s) IPR002775 Alba, DNA/RNA-binding protein	1
mtr-miR5296	SlAlba7	5	-1	1	24	56	79	AUUUUGUGUGGGUGUAAGAGGUGU	: .:::: ::::.:.:::: :.	UCUUCUCUCACACUCGCACACAGA	Cleavage	Ribonuclease P protein subunit p25 (AHRD V1 *--- RPP25_HUMAN); contains Interpro domain(s) IPR002775 Alba, DNA/RNA-binding protein	1
mtr-miR5759	SlAlba7	4	-1	1	21	1442	1462	AAGGGGGUGAAAAGAUUCAAA	: : :::.::::. ::::.::	UCUUAAUUUUUUUCCCCCUUU	Cleavage	Ribonuclease P protein subunit p25 (AHRD V1 *--- RPP25_HUMAN); contains Interpro domain(s) IPR002775 Alba, DNA/RNA-binding protein	1
nta-miR6154a	SlAlba7	5	-1	1	21	218	238	UGGGUCUCCUGGAGAAAGGUC	::. ::::.::::::: ::	UACUCUUCUUCAGGAGAGGCA	Cleavage	Ribonuclease P protein subunit p25 (AHRD V1 *--- RPP25_HUMAN); contains Interpro domain(s) IPR002775 Alba, DNA/RNA-binding protein	1
osa-miR1846a-3p	SlAlba7	5	-1	1	21	931	951	UGACCCCGUUCUCCUCGCCGG	::::. :: ::.:::: ::	GGGGCGGAGAAAAUGGGGCCA	Translation	Ribonuclease P protein subunit p25 (AHRD V1 *--- RPP25_HUMAN); contains Interpro domain(s) IPR002775 Alba, DNA/RNA-binding protein	1
osa-miR1846b-3p	SlAlba7	5	-1	1	21	931	951	UGACCCCGUUCUCCUCGCCGG	::::. :: ::.:::: ::	GGGGCGGAGAAAAUGGGGCCA	Translation	Ribonuclease P protein subunit p25 (AHRD V1 *--- RPP25_HUMAN); contains Interpro domain(s) IPR002775 Alba, DNA/RNA-binding protein	1
osa-miR1882a	SlAlba7	4.5	-1	1	24	244	267	AGAUUGCUUUCAAGGUCAUUUCUU	::::.:: ..::::::::::::	AAGAGAUUGUCUUGAAAGCAAUGG	Cleavage	Ribonuclease P protein subunit p25 (AHRD V1 *--- RPP25_HUMAN); contains Interpro domain(s) IPR002775 Alba, DNA/RNA-binding protein	1
osa-miR2864.1	SlAlba7	5	-1	1	21	922	942	UUUUGCUGCCCUUGUUUUGCA	:::::.::::.: .:::	ACUCAAACAGGGGCGGAGAAA	Cleavage	Ribonuclease P protein subunit p25 (AHRD V1 *--- RPP25_HUMAN); contains Interpro domain(s) IPR002775 Alba, DNA/RNA-binding protein	2
osa-miR2864.1	SlAlba7	5	-1	1	21	1056	1076	UUUUGCUGCCCUUGUUUUGCA	:::::.:::::: ..::	ACUCAAACAGGGGCAGAGGAA	Cleavage	Ribonuclease P protein subunit p25 (AHRD V1 *--- RPP25_HUMAN); contains Interpro domain(s) IPR002775 Alba, DNA/RNA-binding protein	2
osa-miR529a	SlAlba7	5	-1	1	20	1133	1152	CUGUACCCUCUCUCUUCUUC	::::.::. ::::: ::..:	GAAGGAGGCAGAGGUUAUGG	Cleavage	Ribonuclease P protein subunit p25 (AHRD V1 *--- RPP25_HUMAN); contains Interpro domain(s) IPR002775 Alba, DNA/RNA-binding protein	1
osa-miR5340	SlAlba7	4.5	-1	1	23	424	446	UGAUGACGUGGAUGAAUUUCAAA	.: :::: .:::::..:::	CAGUGAUUUCAAUCACGUUGUCA	Cleavage	Ribonuclease P protein subunit p25 (AHRD V1 *--- RPP25_HUMAN); contains Interpro domain(s) IPR002775 Alba, DNA/RNA-binding protein	1
pde-miR396	SlAlba7	5	-1	1	21	223	243	UCCCACGGCUUUCUUGAACUU	::::.::.:: : :::::	UUCUUCAGGAGAGGCAUGGGA	Cleavage	Ribonuclease P protein subunit p25 (AHRD V1 *--- RPP25_HUMAN); contains Interpro domain(s) IPR002775 Alba, DNA/RNA-binding protein	1
ppt-miR1068	SlAlba7	5	-1	1	21	659	679	UAGCCAUUUGCUUGAAGGUCA	::. ::::: ::::::. :	AAACUAUCAAGAAAAUGGUGA	Translation	Ribonuclease P protein subunit p25 (AHRD V1 *--- RPP25_HUMAN); contains Interpro domain(s) IPR002775 Alba, DNA/RNA-binding protein	1
ppt-miR1075	SlAlba7	5	-1	1	21	625	645	UGUUUCAGUCAUGGUUUCUAC	: ::... :.::..::.:.::	GGAGGGGACGUGGUUGGAGCA	Cleavage	Ribonuclease P protein subunit p25 (AHRD V1 *--- RPP25_HUMAN); contains Interpro domain(s) IPR002775 Alba, DNA/RNA-binding protein	1
ppt-miR160g	SlAlba7	5	-1	1	21	255	275	UGCCUGGCUCCUUGUAUGCCA	: : : .::: :.:.::::::	UUGAAAGCAAUGGGUCAGGCA	Translation	Ribonuclease P protein subunit p25 (AHRD V1 *--- RPP25_HUMAN); contains Interpro domain(s) IPR002775 Alba, DNA/RNA-binding protein	1
ptc-miR156l	SlAlba7	5	-1	1	21	46	66	UUGACAGAAGAUGGAGAGCAC	: : .:::::::::: :::	CUUCCUUCCAUCUUCUCUCAC	Cleavage	Ribonuclease P protein subunit p25 (AHRD V1 *--- RPP25_HUMAN); contains Interpro domain(s) IPR002775 Alba, DNA/RNA-binding protein	1
ptc-miR6449	SlAlba7	4.5	-1	1	21	1325	1345	CAUGAUUCUGAAUAACGGUUU	:..::: ::::: :::.::	UUAUUGUUUUUCAGCAUCGUG	Cleavage	Ribonuclease P protein subunit p25 (AHRD V1 *--- RPP25_HUMAN); contains Interpro domain(s) IPR002775 Alba, DNA/RNA-binding protein	1
ptc-miR828a	SlAlba7	4.5	-1	1	22	586	607	UCUUGCUCAAAUGAGUAUUCCA	::: :.:::: ::.::.::.	AUGAAGAUUCAUAUGGGCGAGG	Translation	Ribonuclease P protein subunit p25 (AHRD V1 *--- RPP25_HUMAN); contains Interpro domain(s) IPR002775 Alba, DNA/RNA-binding protein	1
ptc-miR828b-5p	SlAlba7	4.5	-1	1	22	586	607	UCUUGCUCAAAUGAGUAUUCCA	::: :.:::: ::.::.::.	AUGAAGAUUCAUAUGGGCGAGG	Translation	Ribonuclease P protein subunit p25 (AHRD V1 *--- RPP25_HUMAN); contains Interpro domain(s) IPR002775 Alba, DNA/RNA-binding protein	1
sbi-miR529	SlAlba7	5	-1	1	20	1133	1152	CUGUACCCUCUCUCUUCUUC	::::.::. ::::: ::..:	GAAGGAGGCAGAGGUUAUGG	Cleavage	Ribonuclease P protein subunit p25 (AHRD V1 *--- RPP25_HUMAN); contains Interpro domain(s) IPR002775 Alba, DNA/RNA-binding protein	1
sbi-miR6223-5p	SlAlba7	5	-1	1	21	476	496	UUCUUGGGAGGAGCAUGCUAG	:: :: ::::::.:..::.	GUAUCAAGCUCCUUCUGAGGU	Cleavage	Ribonuclease P protein subunit p25 (AHRD V1 *--- RPP25_HUMAN); contains Interpro domain(s) IPR002775 Alba, DNA/RNA-binding protein	1
sly-miR9473-3p	SlAlba7	5	-1	1	21	1434	1454	AAACGAGUUCAGAUUUACAGC	:::: :::: ::.:. :::	UAUGUAUAUCUUAAUUUUUUU	Translation	Ribonuclease P protein subunit p25 (AHRD V1 *--- RPP25_HUMAN); contains Interpro domain(s) IPR002775 Alba, DNA/RNA-binding protein	1
ssl-miR828	SlAlba7	4.5	-1	1	22	586	607	UCUUGCUCAAAUGAGUAUUCCA	::: :.:::: ::.::.::.	AUGAAGAUUCAUAUGGGCGAGG	Translation	Ribonuclease P protein subunit p25 (AHRD V1 *--- RPP25_HUMAN); contains Interpro domain(s) IPR002775 Alba, DNA/RNA-binding protein	1
ssp-miR1128	SlAlba7	4.5	-1	1	21	868	888	UACUACUCCCUCCGUCCCAAA	::::.:::::: : :.::.	ACUGGGGCGGAGGAAAUGGUG	Cleavage	Ribonuclease P protein subunit p25 (AHRD V1 *--- RPP25_HUMAN); contains Interpro domain(s) IPR002775 Alba, DNA/RNA-binding protein	1
stu-miR166c-5p	SlAlba7	5	-1	1	21	449	469	GGAAUGUUGUUUGGCUCGAGG	::::..::::::: :.:	ACAAGAGCUGAACAACAAUUC	Cleavage	Ribonuclease P protein subunit p25 (AHRD V1 *--- RPP25_HUMAN); contains Interpro domain(s) IPR002775 Alba, DNA/RNA-binding protein	1
stu-miR8036-3p	SlAlba7	4	-1	1	22	230	251	UAUGUCUUUCCGAUGCCUCCCA	: ::::::: ::::::: ::	GGAGAGGCAUGGGAAAGAGAUU	Cleavage	Ribonuclease P protein subunit p25 (AHRD V1 *--- RPP25_HUMAN); contains Interpro domain(s) IPR002775 Alba, DNA/RNA-binding protein	1
vvi-miR828a	SlAlba7	4.5	-1	1	22	586	607	UCUUGCUCAAAUGAGUAUUCCA	::: :.:::: ::.::.::.	AUGAAGAUUCAUAUGGGCGAGG	Translation	Ribonuclease P protein subunit p25 (AHRD V1 *--- RPP25_HUMAN); contains Interpro domain(s) IPR002775 Alba, DNA/RNA-binding protein	1
zma-miR164c-3p	SlAlba7	5	-1	1	21	637	657	CAUGUGCCCUUCUUCUCCAUC	: ::::: :::.: : :.:::	GUUGGAGCAGAGGUGGAUAUG	Cleavage	Ribonuclease P protein subunit p25 (AHRD V1 *--- RPP25_HUMAN); contains Interpro domain(s) IPR002775 Alba, DNA/RNA-binding protein	1
zma-miR166k-5p	SlAlba7	5	-1	1	21	449	469	GGAUUGUUGUCUGGCUCGGGG	::::.. ::::::::.:	ACAAGAGCUGAACAACAAUUC	Translation	Ribonuclease P protein subunit p25 (AHRD V1 *--- RPP25_HUMAN); contains Interpro domain(s) IPR002775 Alba, DNA/RNA-binding protein	1
zma-miR166n-5p	SlAlba7	5	-1	1	21	449	469	GGAUUGUUGUCUGGCUCGGUG	::::.. ::::::::.:	ACAAGAGCUGAACAACAAUUC	Translation	Ribonuclease P protein subunit p25 (AHRD V1 *--- RPP25_HUMAN); contains Interpro domain(s) IPR002775 Alba, DNA/RNA-binding protein	1
aly-miR169a-3p	SlAlba8	5	-1	1	21	865	885	GGCAAGUUGUCCUUGGCUACA	: ::: :::: : ::.::::.	UAUAGGCAAGAAGAAUUUGCU	Translation	Ribonuclease P protein subunit p25 (AHRD V1 *--- RPP25_HUMAN); contains Interpro domain(s) IPR002775 Alba, DNA/RNA-binding protein	1
aly-miR3434-5p	SlAlba8	4	-1	1	21	395	415	GCUGAUUCUCUGAUUUUGAAC	:::..: :::::::::: :	AGUCAGGAGCAGAGAAUCAAC	Cleavage	Ribonuclease P protein subunit p25 (AHRD V1 *--- RPP25_HUMAN); contains Interpro domain(s) IPR002775 Alba, DNA/RNA-binding protein	1
aly-miR3437-5p	SlAlba8	3.5	-1	1	21	999	1019	AAAAAACAAGGAUCCACGGAU	:. :: :.:.::::::::::	UUUGGUUGGUUCUUGUUUUUU	Cleavage	Ribonuclease P protein subunit p25 (AHRD V1 *--- RPP25_HUMAN); contains Interpro domain(s) IPR002775 Alba, DNA/RNA-binding protein	1
aly-miR3440-5p	SlAlba8	4.5	-1	1	22	530	551	UGGUUUCCCUGGCCAAUCCACU	::. :::..: ::::::.:	GCAGGGGUGGUUAUGGAAACUA	Cleavage	Ribonuclease P protein subunit p25 (AHRD V1 *--- RPP25_HUMAN); contains Interpro domain(s) IPR002775 Alba, DNA/RNA-binding protein	1
aly-miR3446-3p	SlAlba8	4.5	-1	1	24	779	802	UGCCACUCUUUUAGCUUCCGAAUC	:: ::::.:::.... .::::::	GAGGCGGAGGCUGGGGUGGUGGCA	Cleavage	Ribonuclease P protein subunit p25 (AHRD V1 *--- RPP25_HUMAN); contains Interpro domain(s) IPR002775 Alba, DNA/RNA-binding protein	1
aly-miR834-5p	SlAlba8	5	-1	1	21	730	750	ACCACAGCUUCUGCUACGAAC	: ::: .:::::.:.:: ::	GGUCGAGGCAGAGGUUGGGGA	Cleavage	Ribonuclease P protein subunit p25 (AHRD V1 *--- RPP25_HUMAN); contains Interpro domain(s) IPR002775 Alba, DNA/RNA-binding protein	2
aly-miR834-5p	SlAlba8	5	-1	1	21	775	795	ACCACAGCUUCUGCUACGAAC	:: .::.::.:::: :::	GGCCGAGGCGGAGGCUGGGGU	Cleavage	Ribonuclease P protein subunit p25 (AHRD V1 *--- RPP25_HUMAN); contains Interpro domain(s) IPR002775 Alba, DNA/RNA-binding protein	2
aly-miR838-5p	SlAlba8	5	-1	1	21	1001	1021	UGCAAGAAUGAGAAGCAAAGC	::: ::::..::.:: ::	UGGUUGGUUCUUGUUUUUUCA	Cleavage	Ribonuclease P protein subunit p25 (AHRD V1 *--- RPP25_HUMAN); contains Interpro domain(s) IPR002775 Alba, DNA/RNA-binding protein	1
aly-miR847-5p	SlAlba8	5	-1	1	21	105	125	UCUUGAUGAAGAGGAAUGGAA	: ::: :::::: :::.::	UGCCACCACUCUUCUUCAGGA	Cleavage	Ribonuclease P protein subunit p25 (AHRD V1 *--- RPP25_HUMAN); contains Interpro domain(s) IPR002775 Alba, DNA/RNA-binding protein	1
aly-miR861-3p	SlAlba8	5	-1	1	21	220	240	GAUGGAUAUAUCUUCAAGAAC	: : : :::::: :::.:::	UUGCAUCAAGAUACAUCUAUC	Cleavage	Ribonuclease P protein subunit p25 (AHRD V1 *--- RPP25_HUMAN); contains Interpro domain(s) IPR002775 Alba, DNA/RNA-binding protein	1
ata-miR169d-3p	SlAlba8	5	-1	1	21	865	885	GGCAAGUUGUCCUUGGCUACA	: ::: :::: : ::.::::.	UAUAGGCAAGAAGAAUUUGCU	Translation	Ribonuclease P protein subunit p25 (AHRD V1 *--- RPP25_HUMAN); contains Interpro domain(s) IPR002775 Alba, DNA/RNA-binding protein	1
ath-miR5024-3p	SlAlba8	5	-1	1	21	479	499	CCGUAUCUUGGCCUUGUCAUU	: :.:::::.::.:: ::	GUGGUCGAGGCCGAGGUAGGG	Cleavage	Ribonuclease P protein subunit p25 (AHRD V1 *--- RPP25_HUMAN); contains Interpro domain(s) IPR002775 Alba, DNA/RNA-binding protein	1
ath-miR774a	SlAlba8	5	-1	1	21	820	840	UUGGUUACCCAUAUGGCCAUC	::::. ::::::...:.:	CGAGGCCGGAUGGGUGGUCGA	Cleavage	Ribonuclease P protein subunit p25 (AHRD V1 *--- RPP25_HUMAN); contains Interpro domain(s) IPR002775 Alba, DNA/RNA-binding protein	1
ath-miR869.1	SlAlba8	5	-1	1	21	338	358	AUUGGUUCAAUUCUGGUGUUG	:::: : ::.:::::.:::	CAACUGCUGAGUUGAAUCAAA	Cleavage	Ribonuclease P protein subunit p25 (AHRD V1 *--- RPP25_HUMAN); contains Interpro domain(s) IPR002775 Alba, DNA/RNA-binding protein	1
ath-miR870-5p	SlAlba8	4.5	-1	1	21	959	979	AAGAACAUCAAAUUAGAAUGU	.:: :.: .::::::::: ::	GCAGUUUUGUUUGAUGUUAUU	Cleavage	Ribonuclease P protein subunit p25 (AHRD V1 *--- RPP25_HUMAN); contains Interpro domain(s) IPR002775 Alba, DNA/RNA-binding protein	1
bcy-miR529	SlAlba8	4.5	-1	1	20	102	121	GAAGAAGAGAGAUGGUAGAG	:: :.::: : :::::::::	CUAUGCCACCACUCUUCUUC	Translation	Ribonuclease P protein subunit p25 (AHRD V1 *--- RPP25_HUMAN); contains Interpro domain(s) IPR002775 Alba, DNA/RNA-binding protein	1
bdi-miR169a-3p	SlAlba8	4	-1	1	21	865	885	GGCGAGUUGUUCUUGGCUACA	: ::: :::::: ::.:.::.	UAUAGGCAAGAAGAAUUUGCU	Cleavage	Ribonuclease P protein subunit p25 (AHRD V1 *--- RPP25_HUMAN); contains Interpro domain(s) IPR002775 Alba, DNA/RNA-binding protein	1
bdi-miR437	SlAlba8	5	-1	1	21	930	950	GAACUUAGAGAAGUUUGACUU	:: ::::::.:.:.:::	GUGUGAAACUUUUUUGAGUGA	Cleavage	Ribonuclease P protein subunit p25 (AHRD V1 *--- RPP25_HUMAN); contains Interpro domain(s) IPR002775 Alba, DNA/RNA-binding protein	1
bdi-miR5200c	SlAlba8	5	-1	1	21	270	290	UGUAGAUACUCUCUAAGGCUU	::::. :::: .::::::	GCCCCUUGAAGAGGGUCUACA	Cleavage	Ribonuclease P protein subunit p25 (AHRD V1 *--- RPP25_HUMAN); contains Interpro domain(s) IPR002775 Alba, DNA/RNA-binding protein	1
bdi-miR7735-5p	SlAlba8	5	-1	1	24	411	435	UUGUUUUCCUU-CUGCACUCCCGGC	: ::::: :::::::::::	UCAACAACUGCAGCAAGGAAAACAA	Translation	Ribonuclease P protein subunit p25 (AHRD V1 *--- RPP25_HUMAN); contains Interpro domain(s) IPR002775 Alba, DNA/RNA-binding protein	1
bdi-miR7748b-3p	SlAlba8	5	-1	1	24	963	986	UUGGUCAAAGAAAAUCUAAUACGC	:.:: ::: :: ::::.:.::	UUUUGUUUGAUGUUAUUUGGCUAA	Translation	Ribonuclease P protein subunit p25 (AHRD V1 *--- RPP25_HUMAN); contains Interpro domain(s) IPR002775 Alba, DNA/RNA-binding protein	1
bdi-miR7753-5p	SlAlba8	5	-1	1	21	832	852	AUGUCUUCUUCCUUGCUCAUC	:.::. :.::::.::::. .:	GGUGGUCGAGGAGGAAGGGGU	Cleavage	Ribonuclease P protein subunit p25 (AHRD V1 *--- RPP25_HUMAN); contains Interpro domain(s) IPR002775 Alba, DNA/RNA-binding protein	1
bdi-miR9494	SlAlba8	5	-1	1	21	781	801	UUCAUCACCUUCGUCUCCGUC	:.:::::.: ..::::.::.	GGCGGAGGCUGGGGUGGUGGC	Cleavage	Ribonuclease P protein subunit p25 (AHRD V1 *--- RPP25_HUMAN); contains Interpro domain(s) IPR002775 Alba, DNA/RNA-binding protein	1
bgy-miR529	SlAlba8	4.5	-1	1	20	102	121	GAAGAAGAGAGAUGGUAGAG	:: :.::: : :::::::::	CUAUGCCACCACUCUUCUUC	Translation	Ribonuclease P protein subunit p25 (AHRD V1 *--- RPP25_HUMAN); contains Interpro domain(s) IPR002775 Alba, DNA/RNA-binding protein	1
cca-miR6118-3p	SlAlba8	5	-1	1	22	526	547	UUCCGAGGCCACCCAUUCCAAC	:: : ::::::.. .::::	CGCGGCAGGGGUGGUUAUGGAA	Cleavage	Ribonuclease P protein subunit p25 (AHRD V1 *--- RPP25_HUMAN); contains Interpro domain(s) IPR002775 Alba, DNA/RNA-binding protein	1
esi-miR3453-5p	SlAlba8	3	-1	1	21	826	846	UUCUCCUCGAUCGCCCGCCUG	:.: .:::.:.::::::::.:	CGGAUGGGUGGUCGAGGAGGA	Cleavage	Ribonuclease P protein subunit p25 (AHRD V1 *--- RPP25_HUMAN); contains Interpro domain(s) IPR002775 Alba, DNA/RNA-binding protein	1
ghr-miR7496a	SlAlba8	5	-1	1	24	984	1007	AUGACCAAAUUGAUAGAAUGUGUA	:: : .::::.:.: ::::::..	UAAAGGUUCUGUUACUUUGGUUGG	Translation	Ribonuclease P protein subunit p25 (AHRD V1 *--- RPP25_HUMAN); contains Interpro domain(s) IPR002775 Alba, DNA/RNA-binding protein	1
ghr-miR7496b	SlAlba8	5	-1	1	24	984	1007	AUGACCAAAUUGAUAGAAUGUGUA	:: : .::::.:.: ::::::..	UAAAGGUUCUGUUACUUUGGUUGG	Translation	Ribonuclease P protein subunit p25 (AHRD V1 *--- RPP25_HUMAN); contains Interpro domain(s) IPR002775 Alba, DNA/RNA-binding protein	1
ghr-miR7505	SlAlba8	5	-1	1	21	527	547	UUCAGAAACCAUCCCUUCCUU	:: ::::.::::: . :::	GCGGCAGGGGUGGUUAUGGAA	Cleavage	Ribonuclease P protein subunit p25 (AHRD V1 *--- RPP25_HUMAN); contains Interpro domain(s) IPR002775 Alba, DNA/RNA-binding protein	1
gma-miR1520a	SlAlba8	5	-1	1	23	1041	1063	UAGAACAUGAUACAUGACAGUCA	:: :::::::::: .: :::.:	UGUCUGUCAUGUAAUAAGUUUUC	Translation	Ribonuclease P protein subunit p25 (AHRD V1 *--- RPP25_HUMAN); contains Interpro domain(s) IPR002775 Alba, DNA/RNA-binding protein	1
gma-miR169n-3p	SlAlba8	4	-1	1	21	869	889	UGCCGGCAAGUUUCUCUUGGC	: ::::: .::.::::.: ::	GGCAAGAAGAAUUUGCUGUCA	Cleavage	Ribonuclease P protein subunit p25 (AHRD V1 *--- RPP25_HUMAN); contains Interpro domain(s) IPR002775 Alba, DNA/RNA-binding protein	1
gma-miR396a-3p	SlAlba8	5	-1	1	20	953	972	UUCAAUAAAGCUGUGGGAAG	.::: ..:::.:::.:: .:	UUUCAUGCAGUUUUGUUUGA	Cleavage	Ribonuclease P protein subunit p25 (AHRD V1 *--- RPP25_HUMAN); contains Interpro domain(s) IPR002775 Alba, DNA/RNA-binding protein	1
gma-miR396d	SlAlba8	5	-1	1	24	946	969	AAGAAAGCUGUGGGAGAAUAUGGC	:::.:: ..:::.::: ::	AGUGAAUUUUCAUGCAGUUUUGUU	Cleavage	Ribonuclease P protein subunit p25 (AHRD V1 *--- RPP25_HUMAN); contains Interpro domain(s) IPR002775 Alba, DNA/RNA-binding protein	1
gma-miR4386	SlAlba8	4.5	-1	1	24	109	132	UCGAAGGUUCUGGAGAGGACUGCA	:: ::.:::.:::.::: :::	ACCACUCUUCUUCAGGACCAACGA	Cleavage	Ribonuclease P protein subunit p25 (AHRD V1 *--- RPP25_HUMAN); contains Interpro domain(s) IPR002775 Alba, DNA/RNA-binding protein	1
gma-miR9760	SlAlba8	4.5	-1	1	21	84	104	UGGAUGAUGUAGUUUUGAUUG	.: ::.:::.:::::.: :.:	UAUUCGAAAUUACAUUAGCUA	Cleavage	Ribonuclease P protein subunit p25 (AHRD V1 *--- RPP25_HUMAN); contains Interpro domain(s) IPR002775 Alba, DNA/RNA-binding protein	1
gra-miR8642	SlAlba8	5	-1	1	24	372	395	UGAUCAAAACAGGAACGAAUUCAA	:. :: ::. ::::::::::	CCAAGCUCCGUCUCGUUUUGAUCA	Translation	Ribonuclease P protein subunit p25 (AHRD V1 *--- RPP25_HUMAN); contains Interpro domain(s) IPR002775 Alba, DNA/RNA-binding protein	1
gra-miR8665	SlAlba8	5	-1	1	24	649	672	UUAAUUAUUAUAUAGAUCAAGGAU	:::: :::: ::::: ::	GAUAAUGAUGGAUAUUAUAAUCAA	Cleavage	Ribonuclease P protein subunit p25 (AHRD V1 *--- RPP25_HUMAN); contains Interpro domain(s) IPR002775 Alba, DNA/RNA-binding protein	1
gra-miR8743a	SlAlba8	4.5	-1	1	24	1043	1066	UAUGAAAAGUUAUAAAAUGGUCAU	..::: : :::: :::::::	UCUGUCAUGUAAUAAGUUUUCAUU	Cleavage	Ribonuclease P protein subunit p25 (AHRD V1 *--- RPP25_HUMAN); contains Interpro domain(s) IPR002775 Alba, DNA/RNA-binding protein	1
gra-miR8778	SlAlba8	5	-1	1	24	882	905	UUUCCAUAUUAGGGUUUGAACUUU	::::: :.:.::: : :::	UGCUGUCAAAGCUUGAUAGGAAAA	Cleavage	Ribonuclease P protein subunit p25 (AHRD V1 *--- RPP25_HUMAN); contains Interpro domain(s) IPR002775 Alba, DNA/RNA-binding protein	1
gra-miR8782	SlAlba8	5	-1	1	21	110	130	UUUGGUGUUGAAGGGGAAUAA	: ::..:::::. :::::	CCACUCUUCUUCAGGACCAAC	Cleavage	Ribonuclease P protein subunit p25 (AHRD V1 *--- RPP25_HUMAN); contains Interpro domain(s) IPR002775 Alba, DNA/RNA-binding protein	1
lja-miR7526a	SlAlba8	5	-1	1	21	984	1004	AUCAAGGUAGCUGUAACUUCC	::: : : :.:::.:::.:	UAAAGGUUCUGUUACUUUGGU	Cleavage	Ribonuclease P protein subunit p25 (AHRD V1 *--- RPP25_HUMAN); contains Interpro domain(s) IPR002775 Alba, DNA/RNA-binding protein	1
lja-miR7526b	SlAlba8	5	-1	1	21	984	1004	AUCAAGGUAGCUGUAACUUCC	::: : : :.:::.:::.:	UAAAGGUUCUGUUACUUUGGU	Cleavage	Ribonuclease P protein subunit p25 (AHRD V1 *--- RPP25_HUMAN); contains Interpro domain(s) IPR002775 Alba, DNA/RNA-binding protein	1
lja-miR7531	SlAlba8	4	-1	1	21	509	529	CGUGUUUUCUUUCAUUCCCCA	::: .::.:::...::.::	GAGGGCGUGGAAGGGGACGCG	Cleavage	Ribonuclease P protein subunit p25 (AHRD V1 *--- RPP25_HUMAN); contains Interpro domain(s) IPR002775 Alba, DNA/RNA-binding protein	1
mtr-miR2612	SlAlba8	5	-1	1	21	693	713	UGAUAGUGUCAACUAGUACAG	:: :.:: ::.:.:::::	AGAUAAUGGUGGAUAUUAUCA	Translation	Ribonuclease P protein subunit p25 (AHRD V1 *--- RPP25_HUMAN); contains Interpro domain(s) IPR002775 Alba, DNA/RNA-binding protein	1
mtr-miR2670a	SlAlba8	4.5	-1	1	21	925	945	CAAGAAGGUUGCUCACUAUUU	::.::: : :::.::.:::	GCAUGGUGUGAAACUUUUUUG	Translation	Ribonuclease P protein subunit p25 (AHRD V1 *--- RPP25_HUMAN); contains Interpro domain(s) IPR002775 Alba, DNA/RNA-binding protein	1
mtr-miR2673a	SlAlba8	4.5	-1	1	22	836	857	CCUCUUCCUCUUCCUCUUCCAC	:: ::.:::::::.:: .: ::	GUCGAGGAGGAAGGGGUGGUGG	Cleavage	Ribonuclease P protein subunit p25 (AHRD V1 *--- RPP25_HUMAN); contains Interpro domain(s) IPR002775 Alba, DNA/RNA-binding protein	2
mtr-miR2673a	SlAlba8	4.5	-1	1	22	491	512	CCUCUUCCUCUUCCUCUUCCAC	: :: ::.:: ::::: :::::	GAGGUAGGGGCAGAGGCAGAGG	Cleavage	Ribonuclease P protein subunit p25 (AHRD V1 *--- RPP25_HUMAN); contains Interpro domain(s) IPR002775 Alba, DNA/RNA-binding protein	2
mtr-miR2673b	SlAlba8	4.5	-1	1	22	836	857	CCUCUUCCUCUUCCUCUUCCAC	:: ::.:::::::.:: .: ::	GUCGAGGAGGAAGGGGUGGUGG	Cleavage	Ribonuclease P protein subunit p25 (AHRD V1 *--- RPP25_HUMAN); contains Interpro domain(s) IPR002775 Alba, DNA/RNA-binding protein	2
mtr-miR2673b	SlAlba8	4.5	-1	1	22	491	512	CCUCUUCCUCUUCCUCUUCCAC	: :: ::.:: ::::: :::::	GAGGUAGGGGCAGAGGCAGAGG	Cleavage	Ribonuclease P protein subunit p25 (AHRD V1 *--- RPP25_HUMAN); contains Interpro domain(s) IPR002775 Alba, DNA/RNA-binding protein	2
mtr-miR2676a	SlAlba8	5	-1	1	21	545	565	CAUUGUUUGGAUAAUAAUUUG	::: :: :::: :.:..:::	GAAACUACUAUCAAGAUGAUG	Cleavage	Ribonuclease P protein subunit p25 (AHRD V1 *--- RPP25_HUMAN); contains Interpro domain(s) IPR002775 Alba, DNA/RNA-binding protein	1
mtr-miR5289a	SlAlba8	4	-1	1	24	1051	1074	CGAGGAAAACUGAAAACUUCGGCA	::::::::: ::::..: :	GUAAUAAGUUUUCAUUUUUUUUAG	Translation	Ribonuclease P protein subunit p25 (AHRD V1 *--- RPP25_HUMAN); contains Interpro domain(s) IPR002775 Alba, DNA/RNA-binding protein	1
mtr-miR5289b	SlAlba8	4	-1	1	24	1051	1074	CGAGGAAAACUGAAAACUUCGGCA	::::::::: ::::..: :	GUAAUAAGUUUUCAUUUUUUUUAG	Translation	Ribonuclease P protein subunit p25 (AHRD V1 *--- RPP25_HUMAN); contains Interpro domain(s) IPR002775 Alba, DNA/RNA-binding protein	1
osa-miR1426	SlAlba8	3.5	-1	1	21	448	468	AGAAUCUUGAUGAUGAUUAAA	: :.::. : :::::::::::	UCUGAUUUUAAUCAAGAUUCU	Cleavage	Ribonuclease P protein subunit p25 (AHRD V1 *--- RPP25_HUMAN); contains Interpro domain(s) IPR002775 Alba, DNA/RNA-binding protein	1
osa-miR1862d	SlAlba8	5	-1	1	24	419	442	ACUAGGUUUGUUUAUUUUGGGACG	:::.. ::::::.::::	UGCAGCAAGGAAAACAAGCCUAUG	Cleavage	Ribonuclease P protein subunit p25 (AHRD V1 *--- RPP25_HUMAN); contains Interpro domain(s) IPR002775 Alba, DNA/RNA-binding protein	1
osa-miR1871	SlAlba8	4.5	-1	1	24	48	71	AUGGCUCUGAUAUCAUGUUGGUUU	:: :. :::: :::::::.::	UAAGGAGAAUGAGAUCAGAGUCAC	Cleavage	Ribonuclease P protein subunit p25 (AHRD V1 *--- RPP25_HUMAN); contains Interpro domain(s) IPR002775 Alba, DNA/RNA-binding protein	1
osa-miR2919	SlAlba8	4	-1	1	19	1086	1104	AAGGGGGGGGGGGGAAAGA	::::: :..: ::.:::::	UCUUUACUUCACCUCCCUU	Cleavage	Ribonuclease P protein subunit p25 (AHRD V1 *--- RPP25_HUMAN); contains Interpro domain(s) IPR002775 Alba, DNA/RNA-binding protein	1
osa-miR395f	SlAlba8	5	-1	1	21	1011	1031	GUGAAUUGUUUGGGGGAACUC	:::....:: :..:::::.	UUGUUUUUUCAUAUGAUUCAU	Translation	Ribonuclease P protein subunit p25 (AHRD V1 *--- RPP25_HUMAN); contains Interpro domain(s) IPR002775 Alba, DNA/RNA-binding protein	1
osa-miR5080	SlAlba8	5	-1	1	21	922	942	AAAAGGAUCAUACCGUGACAG	.:: ::.:::.::: :::::	UUGGCAUGGUGUGAAACUUUU	Cleavage	Ribonuclease P protein subunit p25 (AHRD V1 *--- RPP25_HUMAN); contains Interpro domain(s) IPR002775 Alba, DNA/RNA-binding protein	1
osa-miR5532	SlAlba8	5	-1	1	22	1010	1031	AUGGAAUAUAUGACAAAGGUGG	.::: ::::::. :.:::	CUUGUUUUUUCAUAUGAUUCAU	Cleavage	Ribonuclease P protein subunit p25 (AHRD V1 *--- RPP25_HUMAN); contains Interpro domain(s) IPR002775 Alba, DNA/RNA-binding protein	1
osa-miR6255	SlAlba8	5	-1	1	22	1052	1073	UGGGAAAAAUGGGCAGUUGAGU	.:: : ..:::::::...:	UAAUAAGUUUUCAUUUUUUUUA	Cleavage	Ribonuclease P protein subunit p25 (AHRD V1 *--- RPP25_HUMAN); contains Interpro domain(s) IPR002775 Alba, DNA/RNA-binding protein	1
pab-miR3702	SlAlba8	5	-1	1	21	1	21	AAUCUCUUGGUGCUUAUUCGC	.:.:::.:.::::. ::.:	AUGGAUAGGUACCAGAAGGUG	Cleavage	Ribonuclease P protein subunit p25 (AHRD V1 *--- RPP25_HUMAN); contains Interpro domain(s) IPR002775 Alba, DNA/RNA-binding protein	1
ppt-miR1046-3p	SlAlba8	5	-1	1	21	1013	1033	UGGUGAAAAAUAUGAAAAAUC	: :::::::::: ::::..	GUUUUUUCAUAUGAUUCAUUU	Cleavage	Ribonuclease P protein subunit p25 (AHRD V1 *--- RPP25_HUMAN); contains Interpro domain(s) IPR002775 Alba, DNA/RNA-binding protein	1
ppt-miR1222d	SlAlba8	4.5	-1	1	21	259	279	UUUAAGGGGUUCACUGGUAUA	::.: :::.::::::.::	GAUGCAUAUGAGCCCCUUGAA	Cleavage	Ribonuclease P protein subunit p25 (AHRD V1 *--- RPP25_HUMAN); contains Interpro domain(s) IPR002775 Alba, DNA/RNA-binding protein	1
ptc-miR169b-3p	SlAlba8	4	-1	1	20	866	885	GGCAGGUUGUUCUUGGCUAC	::: :::::: ::..:::.	AUAGGCAAGAAGAAUUUGCU	Cleavage	Ribonuclease P protein subunit p25 (AHRD V1 *--- RPP25_HUMAN); contains Interpro domain(s) IPR002775 Alba, DNA/RNA-binding protein	1
ptc-miR475c	SlAlba8	4.5	-1	1	21	649	668	UUACAAUGUCCAUUGAUUAAG	:::: .:::::.::: :::	GAUAAU-GAUGGAUAUUAUAA	Cleavage	Ribonuclease P protein subunit p25 (AHRD V1 *--- RPP25_HUMAN); contains Interpro domain(s) IPR002775 Alba, DNA/RNA-binding protein	1
ptc-miR482d-5p	SlAlba8	5	-1	1	22	424	445	GGACAUGGGUUGGUUUGCAAGA	: :::: :.::.::::.:	CAAGGAAAACAAGCCUAUGUUC	Cleavage	Ribonuclease P protein subunit p25 (AHRD V1 *--- RPP25_HUMAN); contains Interpro domain(s) IPR002775 Alba, DNA/RNA-binding protein	1
ptc-miR7836	SlAlba8	4	-1	1	21	1087	1107	UGGGUGGGAGGUGUGGUAGCU	.:::. :::::::: .:::	CUUUACUUCACCUCCCUUCCA	Cleavage	Ribonuclease P protein subunit p25 (AHRD V1 *--- RPP25_HUMAN); contains Interpro domain(s) IPR002775 Alba, DNA/RNA-binding protein	1
ptc-miR7837	SlAlba8	4	-1	1	21	1087	1107	UGGGUGGGAGGUGUGGUAGCU	.:::. :::::::: .:::	CUUUACUUCACCUCCCUUCCA	Cleavage	Ribonuclease P protein subunit p25 (AHRD V1 *--- RPP25_HUMAN); contains Interpro domain(s) IPR002775 Alba, DNA/RNA-binding protein	1
rgl-miR7807a-5p	SlAlba8	5	-1	1	21	941	964	AACUAUAUGAAAAU---CUCAAUU	::::: ::::::::. ::::	UUUUGAGUGAAUUUUCAUGCAGUU	Cleavage	Ribonuclease P protein subunit p25 (AHRD V1 *--- RPP25_HUMAN); contains Interpro domain(s) IPR002775 Alba, DNA/RNA-binding protein	1
sbi-miR6231-3p	SlAlba8	5	-1	1	21	677	697	UAUUUGUGGACUCAUGGACAU	: : .::.::...::.:::	GAGGCGGUGGGUUUGCAGAUA	Cleavage	Ribonuclease P protein subunit p25 (AHRD V1 *--- RPP25_HUMAN); contains Interpro domain(s) IPR002775 Alba, DNA/RNA-binding protein	1
sbi-miR6232a-5p	SlAlba8	4	-1	1	24	706	729	GUCGCUUUGACUUUUUUGGUACAU	::.::: ::.:::::.:.:..	UAUUAUCAACAAGGUCAAGGUGGU	Cleavage	Ribonuclease P protein subunit p25 (AHRD V1 *--- RPP25_HUMAN); contains Interpro domain(s) IPR002775 Alba, DNA/RNA-binding protein	1
sbi-miR821e	SlAlba8	4.5	-1	1	21	1026	1046	AAGUCAUCAAAAUAAAAGUUG	: :::::::::::: ::	AUUCAUUUAUUUUGAUGUCUG	Cleavage	Ribonuclease P protein subunit p25 (AHRD V1 *--- RPP25_HUMAN); contains Interpro domain(s) IPR002775 Alba, DNA/RNA-binding protein	1
smo-miR1080	SlAlba8	5	-1	1	22	681	702	UUCACUAUCUGCAAACACCUCU	:. : ::::::::::: ::.	CGGUGGGUUUGCAGAUAAUGGU	Cleavage	Ribonuclease P protein subunit p25 (AHRD V1 *--- RPP25_HUMAN); contains Interpro domain(s) IPR002775 Alba, DNA/RNA-binding protein	1
stu-miR8004	SlAlba8	5	-1	1	24	900	922	AGGGGUUGUGUAUGUGUUUGGCCU	:::.:. :.::::::::.:	GGAAAAAAUAU-UGCACAACCCUU	Cleavage	Ribonuclease P protein subunit p25 (AHRD V1 *--- RPP25_HUMAN); contains Interpro domain(s) IPR002775 Alba, DNA/RNA-binding protein	1
stu-miR8011a-5p	SlAlba8	5	-1	1	24	894	917	UUGUGUGAGGUUUCUUUUUGUUUC	.:.:..:: :::. :..:::::	UUGAUAGGAAAAAAUAUUGCACAA	Cleavage	Ribonuclease P protein subunit p25 (AHRD V1 *--- RPP25_HUMAN); contains Interpro domain(s) IPR002775 Alba, DNA/RNA-binding protein	1
stu-miR8023	SlAlba8	4	-1	1	24	129	152	UUUGGCACAAUUUCAUUGGCAACC	: ::::::::::: ...::	ACGAACAAAUGAAAUUGUUUUGAA	Cleavage	Ribonuclease P protein subunit p25 (AHRD V1 *--- RPP25_HUMAN); contains Interpro domain(s) IPR002775 Alba, DNA/RNA-binding protein	1
vvi-miR3630-3p	SlAlba8	5	-1	1	22	183	204	UUUGGGAAUCUCUCUGAUGCAC	:::.. ::::::: ..::.	UGCCAUUGCAGAGAUUAUUAAG	Cleavage	Ribonuclease P protein subunit p25 (AHRD V1 *--- RPP25_HUMAN); contains Interpro domain(s) IPR002775 Alba, DNA/RNA-binding protein	1
vvi-miR3633a-3p	SlAlba8	5	-1	1	22	823	844	UUCCUAUACCACCCAUUCCCUA	:.::::::::: ::::.	GGCCGGAUGGGUGGUCGAGGAG	Cleavage	Ribonuclease P protein subunit p25 (AHRD V1 *--- RPP25_HUMAN); contains Interpro domain(s) IPR002775 Alba, DNA/RNA-binding protein	1
zma-miR169a-3p	SlAlba8	3.5	-1	1	21	865	885	GGCAAGUUGUUCUUGGCUACA	: ::: :::::: ::.::::.	UAUAGGCAAGAAGAAUUUGCU	Cleavage	Ribonuclease P protein subunit p25 (AHRD V1 *--- RPP25_HUMAN); contains Interpro domain(s) IPR002775 Alba, DNA/RNA-binding protein	1
zma-miR169b-3p	SlAlba8	3.5	-1	1	21	865	885	GGCAAGUUGUUCUUGGCUACA	: ::: :::::: ::.::::.	UAUAGGCAAGAAGAAUUUGCU	Cleavage	Ribonuclease P protein subunit p25 (AHRD V1 *--- RPP25_HUMAN); contains Interpro domain(s) IPR002775 Alba, DNA/RNA-binding protein	1
zma-miR169r-3p	SlAlba8	5	-1	1	21	865	885	GGCAAGUUGUCCUUGGCUACA	: ::: :::: : ::.::::.	UAUAGGCAAGAAGAAUUUGCU	Translation	Ribonuclease P protein subunit p25 (AHRD V1 *--- RPP25_HUMAN); contains Interpro domain(s) IPR002775 Alba, DNA/RNA-binding protein	1
zma-miR2118f	SlAlba8	5	-1	1	22	142	163	UUCCCAAUGCCUUCCAUGCCUA	:. : ::::::: :::::	AUUGUUUUGAAGGCAAUGGGAC	Cleavage	Ribonuclease P protein subunit p25 (AHRD V1 *--- RPP25_HUMAN); contains Interpro domain(s) IPR002775 Alba, DNA/RNA-binding protein	1
